# Supplementary material for: Enteroinvasive <em>Escherichia Coli</em> is Inefficient to Escape from Autophagy during Caco-2 Cellular Infection
Source: Preprints.org preprint supplement (doi:10.20944/preprints202202.0321.v1), 2022-02-25
Supplement: Supplementary file 1 [file FigureS1_BandoSY.docx]

**
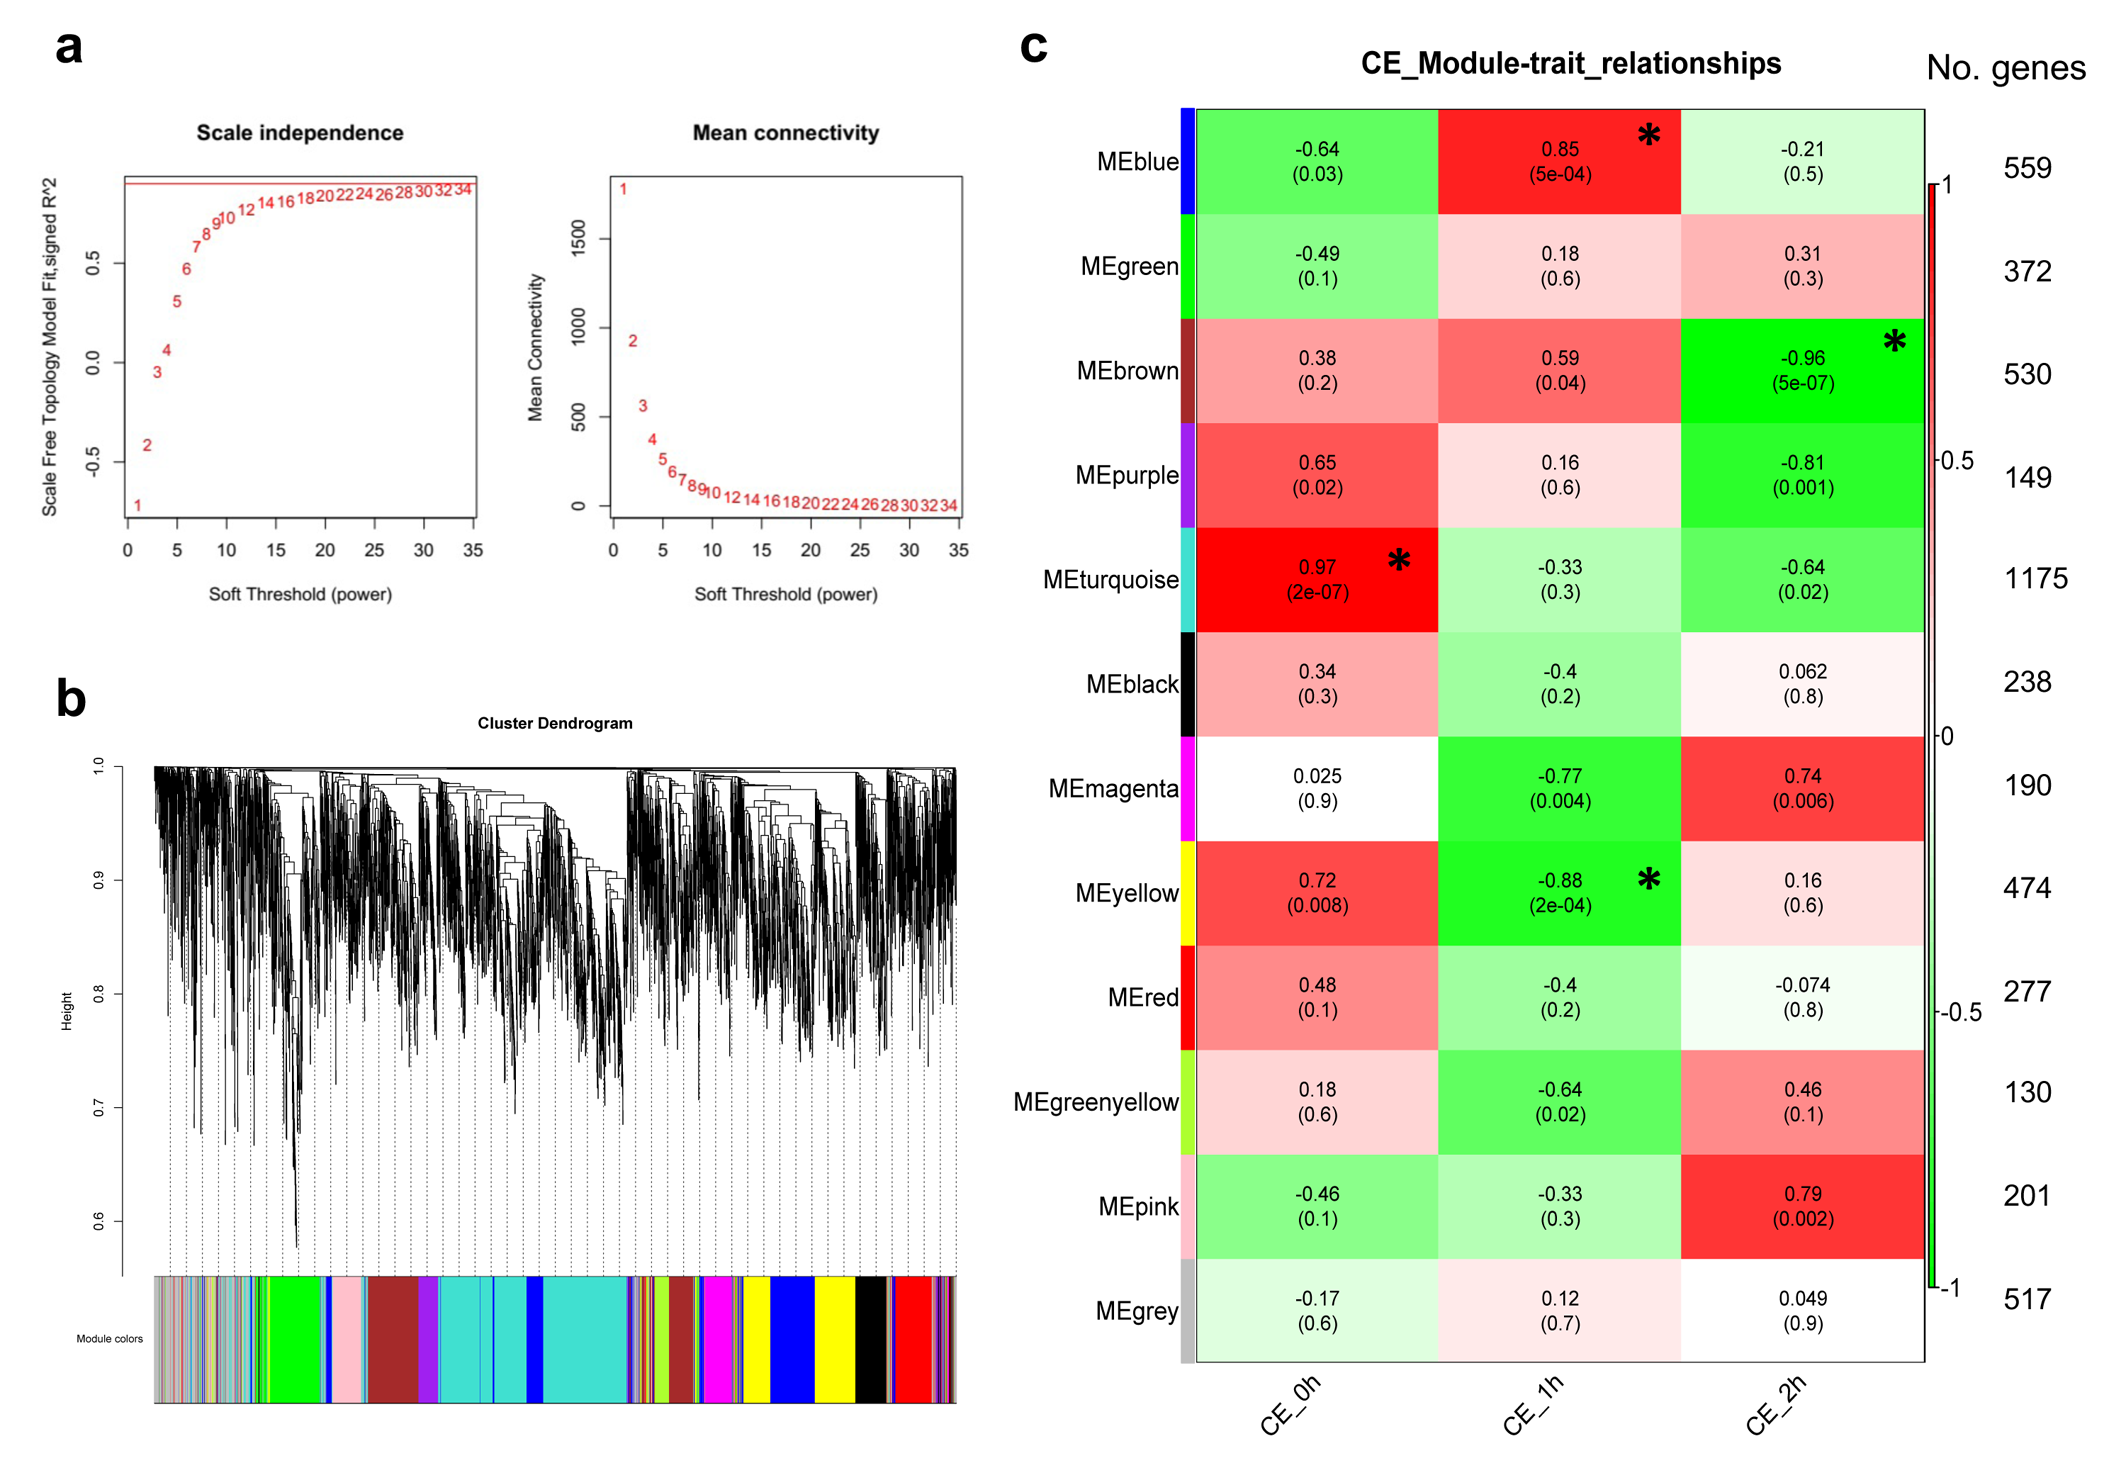
**

**Figure S1.** WGCNA for CE group. **(a)** The dataset was fit to a scale-free model of proposed values for β ranging from 1 to 35 (numbers inside the plots). Left panel shows that approximate scale-free topology is attained around soft-thresholding power of 20. The right plot shows the mean connectivity along with the soft-thresholding power. **(c)** Module-trait correlation with time-intervals. In the rows, modules are identified by their colors and names. In the columns it is shown the trait of interest (time-interval: CE_0h, T0; CE_1h, T1; CE_2h, T2). Numbers inside each colored box are the correlation coefficients (MS) between the module and the specific trait, with p-value between brackets. The more intense the color of the box, the more negatively (green) or positively (red) correlated is the module with the trait. * indicates the module highly correlated with the time-interval (MS < 0.85, p < 5e04).
