# Supplementary material for: Enteroinvasive <em>Escherichia Coli</em> is Inefficient to Escape from Autophagy during Caco-2 Cellular Infection
Source: Preprints.org preprint supplement (doi:10.20944/preprints202202.0321.v1), 2022-02-25
Supplement: Supplementary file 3 [file FigureS3_BandoSY.docx]

**
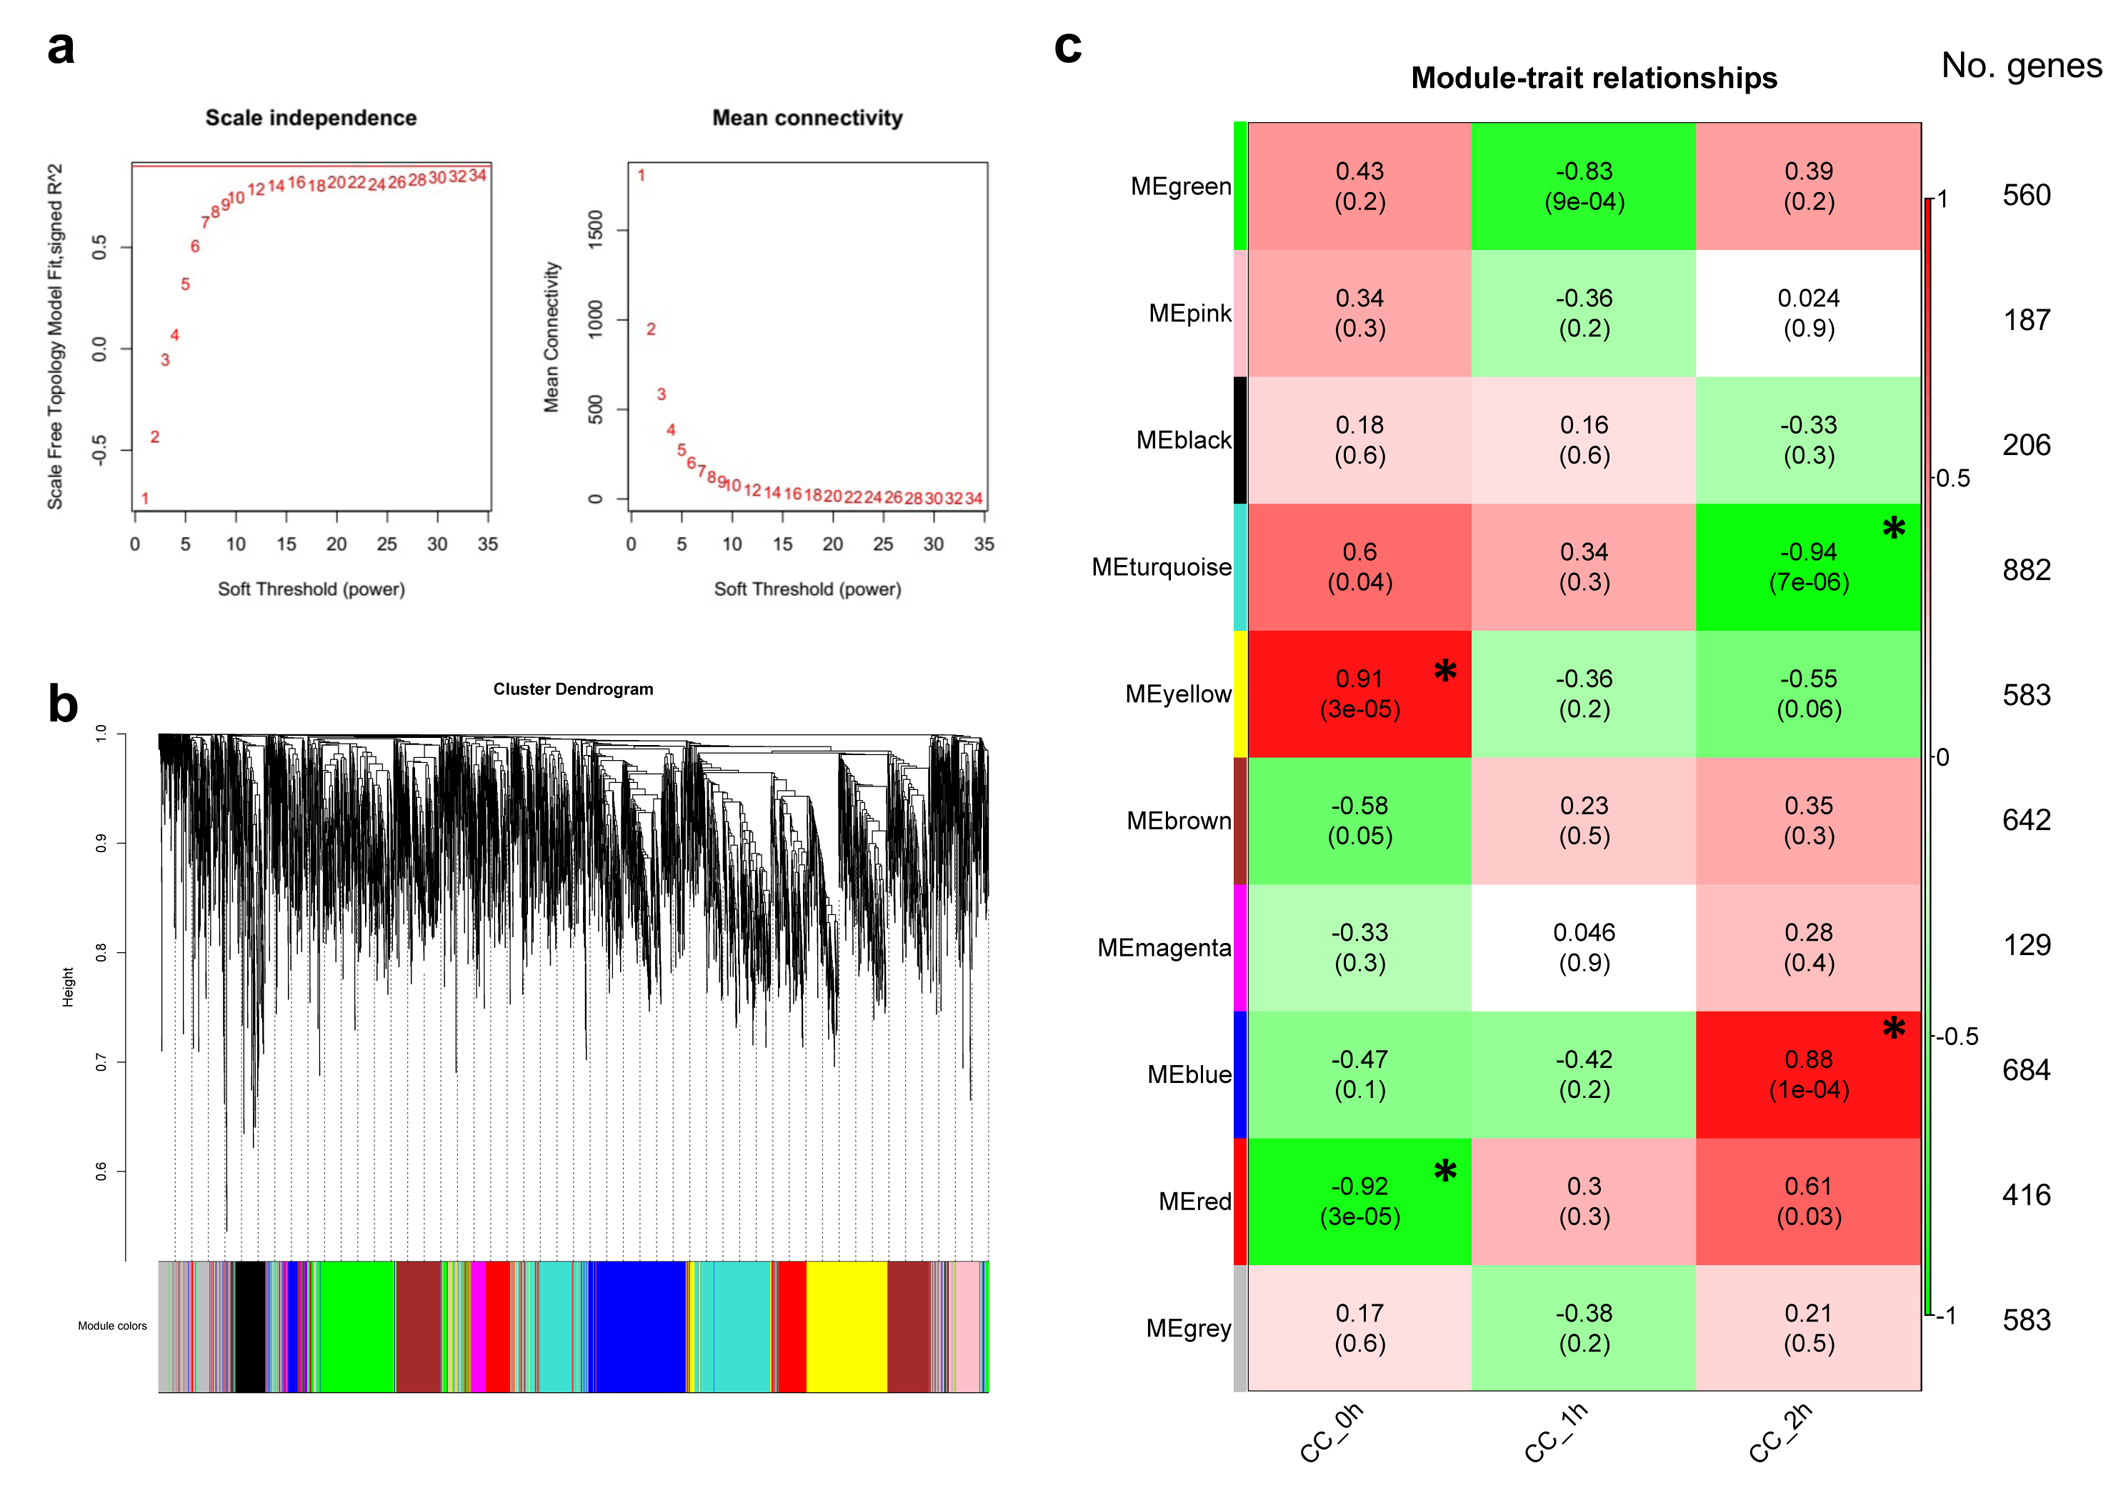
**

**Figure S3.** WGCNA for CC group. **(a)** The dataset was fit to a scale-free model of proposed values for β ranging from 1 to 35 (numbers inside the plots). Left panel shows that approximate scale-free topology is attained around soft-thresholding power of 22. The right plot shows the mean connectivity along with the soft-thresholding power. Soft threshold for scale-free topology. **(b)** Gene co-expression dendrogram and module identification. **(c)** Module-trait correlation with time-intervals. In the rows, MEs are named by their module colors. In the column it is shown the trait of interest (time-interval: CC_0h, T0; CC_1h, T1; CC_2h, T2). Numbers inside each colored box are the correlation coefficients (MS) between the ME and the specific trait, with p-value between brackets. The more intense the color of the box, the more negatively (green) or positively (red) correlated is the module with the trait. * indicates the module highly correlated with the time-interval (MS < 0.85, p < 5e04).
