# Supplementary material for: Enteroinvasive <em>Escherichia Coli</em> is Inefficient to Escape from Autophagy during Caco-2 Cellular Infection
Source: Preprints.org preprint supplement (doi:10.20944/preprints202202.0321.v1), 2022-02-25
Supplement: Supplementary file 4 [file SpreadsheetS1_BandoSY.xlsx]

## Sheet: CE group
List of over-represented KEGG terms for module genes found for CE group. Highest odds ratio-ranked terms appear in bold. Time interval boxes in red or green indicate respectively module positively or negatively correlated with specific time-interval.
Module	KEGG Terms	P-value	Odds Ratio	N. genes	Genes
Turquoise	Arginine biosynthesis	0.00102575	4.86322	6	ARG2	GOT1	NOS2	GLS2	NOS3	NAGS
T0 interval	Glyoxylate and dicarboxylate metabolism	0.000253698	4.53901	8	GRHPR	MCEE	MDH1	SHMT2	SHMT1	GLYCTK	PCCB	ACO2
	Glycine, serine and threonine metabolism	7.90995e-05	4.25532	10	AOC3	GRHPR	SHMT2	PSAT1	SHMT1	GLYCTK	PGAM1	SARDH	BPGM	SDSL
	One carbon pool by folate	0.00512636	4.25532	5	ATIC	MTHFD1L	SHMT2	SHMT1	GART
	Propanoate metabolism	0.0021841	3.7234	7	BCKDHA	MCEE	LDHA	ALDH6A1	PCCB	ABAT	LDHAL6A
	Protein export	0.00961283	3.70028	5	OXA1L	SPCS1	SEC61G	SRPRB	SEC63
	Mismatch repair	0.00961283	3.70028	5	MSH6	POLD4	RFC4	EXO1	POLD1
	Valine, leucine and isoleucine degradation	0.000397764	3.5461	10	BCKDHA	HADHB	HMGCL	MCEE	ALDH6A1	ALDH1B1	PCCB	ABAT	HMGCS2	AACS
	Pentose phosphate pathway	0.00714072	3.40426	6	RPIA	GLYCTK	TALDO1	PGLS	PGM1	RBKS
	Terpenoid backbone biosynthesis	0.0371531	3.09478	4	PDSS2	PDSS1	HMGCS2	ZMPSTE24
	SNARE interactions in vesicular transport	0.0132525	3.00375	6	GOSR2	STX8	VTI1A	SEC22B	USE1	VAMP2
	Bladder cancer	0.00921781	2.90607	7	RB1	NRAS	MMP1	ERBB2	E2F1	E2F3	EGFR
	Cysteine and methionine metabolism	0.00562452	2.89724	8	DNMT1	LDHA	GCLC	AHCYL1	GOT1	MDH1	SDSL	LDHAL6A
	Peroxisome	0.000316949	2.87106	14	NOS2	PEX11A	EPHX2	PEX11B	SOD2	PEX13	GNPAT	HMGCL	ACOX2	HACL1	MPV17	PEX11G	CRAT	PAOX
	RNA degradation	0.000655054	2.80097	13	BTG3	TTC37	BTG2	PABPC4	LSM1	ENO2	LSM2	EXOSC6	EXOSC9	CNOT2	PABPC1L	EXOSC3	EXOSC2
	Legionellosis	0.00446006	2.7853	9	BCL2L13	SAR1A	SAR1B	BNIP3	HSF1	CD14	SEC22B	CXCL2	HSPA1A
	beta-Alanine metabolism	0.0329981	2.74537	5	AOC3	ALDH6A1	ALDH1B1	ABAT	UPB1
	Mitophagy	0.00441393	2.61866	10	BCL2L13	MAPK9	NRAS	BNIP3	CSNK2B	NBR1	E2F1	TOMM7	RRAS2	MFN2
	Nucleotide excision repair	0.0190383	2.53508	7	CUL4A	POLD4	RFC4	CCNH	CETN2	POLD1	ERCC5
	Pathogenic Escherichia coli infection	0.0144286	2.47582	8	TUBA1B	TUBB2B	KRT18	ROCK2	TUBB	NCK2	CD14	EZR
	Central carbon metabolism in cancer	0.0133174	2.35679	9	NRAS	LDHA	GLS2	PGAM1	ERBB2	SLC2A1	EGFR	FGFR2	SIRT3
	Vasopressin-regulated water reabsorption	0.0424938	2.32108	6	ADCY9	CREB3L4	AVP	AQP3	DYNLL2	VAMP2
	mRNA surveillance pathway	0.00688236	2.24456	12	NXT1	PABPC4	CPSF3	CSTF2	PPP2R2D	CSTF2T	PPP2R2A	ETF1	MSI2	PPP2R5C	PPP2R3A	PABPC1L
	Ribosome biogenesis in eukaryotes	0.00617323	2.19086	13	UTP15	POP5	NXT1	REXO1	RPP40	WDR75	GNL2	RCL1	LSG1	NOB1	CSNK2B	SBDS	RIOK1
	HIF-1 signaling pathway	0.0141915	2.04255	12	LDHA	NOS2	IFNGR1	NOS3	ERBB2	PLCG2	PGK1	SLC2A1	ENO2	EIF4E	CAMK2G	EGFR
	RNA transport	0.0336618	1.65055	16	RANBP2	POP5	EIF4A1	SEC13	UBE2I	NXT1	PABPC4	RPP40	FXR1	TACC3	EIF4EBP2	STRAP	NUP98	GEMIN7	PABPC1L	EIF4E
	Protein processing in endoplasmic reticulum	0.0336618	1.65055	16	XBP1	SEC13	SAR1A	SAR1B	EIF2AK1	MAPK9	HSPH1	BAG2	MAN1A2	SEC61G	DNAJC5	DNAJB11	DNAJA2	FBXO6	SEC63	HSPA1A
	Human papillomavirus infection	0.0201056	1.49581	29	RB1	ATP6V1A	MAML1	HDAC1	TRADD	LAMA4	TCF7	PXN	LAMA3	UBR4	PPP2R2A	EGFR	NRAS	CREB3L4	E2F1	ATP6V1C1	APC2	ATP6AP1	FZD4	STAT2	PPP2R5C	PPP2R3A	MPP5	COL1A1	CCNE1	PPP2R2D	TBPL1	ITGA6	ATR
	Pathways in cancer	0.03017	1.34886	42	RB1	CSF1R	CTBP1	ROCK2	HDAC1	LAMA4	TCF7	LAMA3	MGST1	SLC2A1	LPAR2	EGFR	MAPK9	NRAS	FRAT2	ERBB2	PLCG2	E2F1	E2F3	BID	CAMK2G	IL13RA1	APC2	RALBP1	NOS2	FZD4	IFNGR1	MMP1	STAT2	PLEKHG5	GNG12	PGF	EPOR	RUNX1	MSH6	BMP2	ADCY9	SMO	CCNE1	ITGA6	BIRC7	FGFR2
Module	KEGG Terms	P-value	Odds Ratio	N. genes	Genes
Yellow	Vitamin digestion and absorption	0.00227154	7.03235	4	SLC5A6	SCARB1	APOA4	SLC19A1
T1 interval	N-Glycan biosynthesis	2.10182e-05	6.75105	8	ALG8	ALG9	RPN2	RPN1	STT3A	DOLK	MAN1B1	STT3B
	Bladder cancer	0.000381882	6.17475	6	RASSF1	MAP2K1	RPS6KA5	ARAF	FGFR3	MAPK3
	Non-small cell lung cancer	0.00093645	4.47513	7	RASSF1	MAP2K1	CDK6	PDPK1	ARAF	BAX	MAPK3
	Chronic myeloid leukemia	0.000431503	4.44148	8	MAP2K1	HDAC2	CDK6	ARAF	BAX	CRK	RELA	MAPK3
	Salmonella infection	0.00019981	4.41566	9	DYNC1LI1	FLNB	FLNC	MAPK14	RILP	WASF2	RELA	MYD88	MAPK3
	Neurotrophin signaling pathway	2.61623e-05	4.25487	12	MAP2K1	RPS6KA5	PRDM4	PDPK1	BAX	CALML4	MAPK14	CRK	RHOA	RELA	SH2B1	MAPK3
	Fc gamma R-mediated phagocytosis	0.000306891	4.17304	9	MAP2K1	PAK1	LIMK2	LIMK1	RPS6KB2	CRK	WASF2	ARF6	MAPK3
	Fat digestion and absorption	0.0157935	4.1165	4	SCARB1	DGAT2	DGAT1	APOA4
	Pancreatic cancer	0.0019896	3.93812	7	MAP2K1	CDK6	RPS6KB2	ARAF	BAX	RELA	MAPK3
	Pertussis	0.00214767	3.8863	7	C3	CALML4	MAPK14	RHOA	RELA	MYD88	MAPK3
	Acute myeloid leukemia	0.00469718	3.83583	6	MAP2K1	RPS6KB2	ARAF	PIM2	RELA	MAPK3
	T cell receptor signaling pathway	0.000664301	3.75987	9	MAP2K1	PAK1	PDPK1	MAPK14	MAP3K7	MAP3K14	RHOA	RELA	MAPK3
	Glycolysis / Gluconeogenesis	0.00543959	3.72301	6	ADPGK	ALDH3B1	AKR1A1	GALM	GAPDH	PCK2
	Endometrial cancer	0.0119742	3.63742	5	MAP2K1	PDPK1	ARAF	BAX	MAPK3
	Sphingolipid signaling pathway	0.000540632	3.54572	10	MAP2K1	PPP2R5E	PDPK1	SMPD1	BAX	PPP2R5D	MAPK14	RHOA	RELA	MAPK3
	Notch signaling pathway	0.0266877	3.51617	4	JAG2	HDAC2	NUMB	RFNG
	Leishmaniasis	0.00818099	3.42114	6	C3	MAPK14	MAP3K7	RELA	MYD88	MAPK3
	Glioma	0.00871937	3.37553	6	MAP2K1	CDK6	ARAF	BAX	CALML4	MAPK3
	RNA transport	0.000159775	3.32438	13	EIF2B5	CYFIP1	UPF1	DDX20	SRRM1	XPO1	SUMO1	XPOT	EIF3H	SMN1	RPP14	EIF1B	EIF4G3
	C-type lectin receptor signaling pathway	0.00332163	3.2457	8	PAK1	ITPR3	CALML4	MAPK14	MAP3K14	RHOA	RELA	MAPK3
	Shigellosis	0.0188873	3.2457	5	MAPK14	CRK	WASF2	RELA	MAPK3
	Human immunodeficiency virus 1 infection	4.87321e-05	3.18446	16	MAP2K1	LIMK2	LIMK1	ITPR3	CALML4	MAPK14	RELA	PAK1	GNG4	RPS6KB2	BAX	MAP3K7	CRK	AP1M2	MYD88	MAPK3
	IL-17 signaling pathway	0.00661253	3.1759	7	IL17RE	MAPK14	MAP3K7	IL17RC	RELA	HSP90B1	MAPK3
	Long-term potentiation	0.0212594	3.14881	5	MAP2K1	ARAF	ITPR3	CALML4	MAPK3
	Epithelial cell signaling in Helicobacter pylori infection	0.022515	3.10251	5	PAK1	ATP6V1H	MAPK14	MAP3K14	RELA
	Renal cell carcinoma	0.0238176	3.05754	5	MAP2K1	PAK1	ARAF	CRK	MAPK3
	Oocyte meiosis	0.00296074	3.03797	9	MAP2K1	YWHAQ	PPP2R5E	ITPR3	PPP2R5D	CALML4	ANAPC1	ADCY6	MAPK3
	Progesterone-mediated oocyte maturation	0.00921567	2.98342	7	MAP2K1	ARAF	KIF22	MAPK14	ANAPC1	ADCY6	MAPK3
	ErbB signaling pathway	0.0155694	2.97841	6	MAP2K1	PAK1	RPS6KB2	ARAF	CRK	MAPK3
	Colorectal cancer	0.0164134	2.94377	6	MAP2K1	RPS6KB2	ARAF	BAX	RHOA	MAPK3
	Proteoglycans in cancer	0.000327623	2.93889	14	MAP2K1	PDPK1	RDX	ARAF	ITPR3	MAPK14	RHOA	PAK1	RPS6KB2	SDC1	FLNB	FLNC	WNT3	MAPK3
	Melanoma	0.0280133	2.93015	5	MAP2K1	CDK6	ARAF	BAX	MAPK3
	Protein processing in endoplasmic reticulum	0.00197352	2.81294	11	RPN2	RPN1	STT3A	BAX	PREB	UBE2G1	STT3B	MAN1B1	P4HB	UBXN6	HSP90B1
	mRNA surveillance pathway	0.0211088	2.78203	6	UPF1	RNGTT	FIP1L1	PPP2R5E	PPP2R5D	SRRM1
	Insulin signaling pathway	0.00541878	2.77187	9	MAP2K1	PDPK1	MKNK2	RPS6KB2	ARAF	CALML4	CRK	PCK2	MAPK3
	Fluid shear stress and atherosclerosis	0.00594874	2.73199	9	SUMO1	DUSP1	SDC1	CALML4	MAPK14	MAP3K7	RHOA	RELA	HSP90B1
	Viral carcinogenesis	0.00105559	2.72897	13	HDAC2	TBP	CHD4	RHOA	RELA	HDAC6	C3	CCND3	CDK6	YWHAQ	DNAJA3	BAX	MAPK3
	GnRH signaling pathway	0.0232176	2.7222	6	MAP2K1	ITPR3	CALML4	MAPK14	ADCY6	MAPK3
	TNF signaling pathway	0.0158207	2.68508	7	MAP2K1	RPS6KA5	MAPK14	MAP3K7	MAP3K14	RELA	MAPK3
	Serotonergic synapse	0.0180898	2.61379	7	APP	MAP2K1	DUSP1	GNG4	ARAF	ITPR3	MAPK3
	Prostate cancer	0.0278492	2.60994	6	MAP2K1	PDPK1	ARAF	RELA	HSP90B1	MAPK3
	Circadian entrainment	0.0278492	2.60994	6	RPS6KA5	GNG4	ITPR3	CALML4	ADCY6	MAPK3
	Aldosterone synthesis and secretion	0.0290957	2.58331	6	ATF1	SCARB1	ITPR3	CALML4	ATP2B1	ADCY6
	Choline metabolism in cancer	0.0303783	2.55722	6	MAP2K1	SLC44A2	PDPK1	RPS6KB2	WASF2	MAPK3
	HIF-1 signaling pathway	0.0316973	2.53165	6	MAP2K1	MKNK2	RPS6KB2	GAPDH	RELA	MAPK3
	Longevity regulating pathway	0.034446	2.48201	6	HDAC2	AKT1S1	RPS6KB2	BAX	RELA	ADCY6
	Apelin signaling pathway	0.0165099	2.46389	8	MAP2K1	GNG4	RPS6KB2	TFAM	ITPR3	CALML4	ADCY6	MAPK3
	AMPK signaling pathway	0.0242542	2.46132	7	PPP2R5E	PDPK1	AKT1S1	RPS6KB2	PPP2R5D	MAP3K7	PCK2
	Hepatitis C	0.0117504	2.44998	9	SCARB1	MAP2K1	CDK6	YWHAQ	CLDN15	ARAF	BAX	RELA	MAPK3
	Measles	0.0171765	2.44603	8	CCND3	CDK6	BAX	EIF3H	ADAR	MAP3K7	MYD88	RELA
	Human cytomegalovirus infection	0.00287166	2.43788	13	MAP2K1	ITPR3	CALML4	MAPK14	RHOA	ADCY6	RELA	CDK6	GNG4	RPS6KB2	BAX	CRK	MAPK3
	Toll-like receptor signaling pathway	0.0373441	2.43427	6	MAP2K1	MAPK14	MAP3K7	MYD88	RELA	MAPK3
	MAPK signaling pathway	0.000720305	2.43152	17	MAP2K1	DUSP3	DUSP1	ARAF	MAPK14	RELA	PAK1	RPS6KA5	MKNK2	FLNB	FLNC	MAP3K7	MAP3K14	FGFR3	CRK	MYD88	MAPK3
	Parathyroid hormone synthesis, secretion and action	0.0403936	2.38834	6	MAP2K1	ARAF	ITPR3	RHOA	ADCY6	MAPK3
	Cell cycle	0.0283578	2.38192	7	CCND3	HDAC2	CDK6	YWHAQ	MCM5	MCM6	ANAPC1
	Cellular senescence	0.0142265	2.37342	9	CCND3	MAP2K1	CDK6	ITPR3	CALML4	MAPK14	ZFP36L2	RELA	MAPK3
	Regulation of actin cytoskeleton	0.00519364	2.36602	12	CYFIP1	PAK1	MAP2K1	LIMK2	RDX	LIMK1	ARAF	FGFR3	CRK	WASF2	RHOA	MAPK3
	Apoptosis	0.0208017	2.36051	8	MAP2K1	PDPK1	TNFRSF10B	BAX	ITPR3	MAP3K14	RELA	MAPK3
	Hepatitis B	0.015886	2.32974	9	MAP2K1	YWHAQ	ARAF	BAX	MAPK14	MAP3K7	MYD88	RELA	MAPK3
	Adrenergic signaling in cardiomyocytes	0.0223934	2.32795	8	RPS6KA5	PPP2R5E	PPP2R5D	CALML4	ATP2B1	MAPK14	ADCY6	MAPK3
	Osteoclast differentiation	0.0317275	2.32566	7	MAP2K1	FHL2	MAPK14	MAP3K7	MAP3K14	RELA	MAPK3
	Autophagy	0.0329078	2.30749	7	MAP2K1	PDPK1	AKT1S1	RPS6KB2	MAP3K7	ATG7	MAPK3
	Breast cancer	0.0240692	2.29628	8	JAG2	MAP2K1	CDK6	RPS6KB2	ARAF	BAX	WNT3	MAPK3
	Kaposi sarcoma-associated herpesvirus infection	0.0134972	2.2685	10	C3	MAP2K1	CDK6	GNG4	BAX	ITPR3	CALML4	MAPK14	RELA	MAPK3
	Vascular smooth muscle contraction	0.0379207	2.23757	7	MAP2K1	ARAF	ITPR3	CALML4	RHOA	ADCY6	MAPK3
	FoxO signaling pathway	0.0379207	2.23757	7	MAP2K1	PDPK1	PLK2	ARAF	MAPK14	PCK2	MAPK3
	Influenza A	0.0210015	2.22074	9	FDPS	MAP2K1	XPO1	TNFRSF10B	ADAR	MAPK14	MYD88	RELA	MAPK3
	mTOR signaling pathway	0.0286392	2.22074	8	MAP2K1	PDPK1	AKT1S1	RPS6KB2	ATP6V1H	WNT3	RHOA	MAPK3
	NOD-like receptor signaling pathway	0.0263689	2.13341	9	SHARPIN	ITPR3	TP53BP1	MAPK14	MAP3K7	MYD88	RHOA	RELA	MAPK3
	Tuberculosis	0.027208	2.12149	9	C3	ATP6V1H	BAX	CALML4	MAPK14	MYD88	RHOA	RELA	MAPK3
	Focal adhesion	0.0206425	2.12031	10	PAK1	CCND3	MAP2K1	PDPK1	COL6A2	FLNB	FLNC	CRK	RHOA	MAPK3
	Human T-cell leukemia virus 1 infection	0.0157076	2.11934	11	FDPS	CCND3	MAP2K1	XPO1	TBP	BAX	MAP3K14	ADCY6	RELA	ANAPC1	MAPK3
	Alcoholism	0.0280657	2.1097	9	MAP2K1	HDAC2	H2AFY	GNG4	H2AFX	ARAF	CALML4	HDAC6	MAPK3
	Necroptosis	0.0395056	2.08366	8	SHARPIN	H2AFY	SMPD1	H2AFX	TNFRSF10B	BAX	PPIA	CHMP7
	Human papillomavirus infection	0.0056796	2.04577	16	MAP2K1	HDAC2	TBP	CHD4	PPP2R5D	RFNG	RELA	CCND3	CDK6	PPP2R5E	COL6A2	RPS6KB2	ATP6V1H	BAX	WNT3	MAPK3
	PI3K-Akt signaling pathway	0.0223309	1.78789	15	MAP2K1	PDPK1	PPP2R5D	RELA	HSP90B1	CCND3	CDK6	YWHAQ	PPP2R5E	GNG4	COL6A2	RPS6KB2	FGFR3	PCK2	MAPK3
	Pathways in cancer	0.0156405	1.67184	21	JAG2	MAP2K1	HDAC2	ARAF	CALML4	ADCY6	RHOA	RELA	HSP90B1	RASSF1	CCND3	CDK6	RPS6KA5	GNG4	RPS6KB2	BAX	PIM2	CRK	FGFR3	WNT3	MAPK3
Module	KEGG Terms	P-value	Odds Ratio	N. genes	Genes
Blue	Synthesis and degradation of ketone bodies	0.0302438	7.15564	2	HMGCS1	ACAT1
T1 interval	Citrate cycle (TCA cycle)	0.00133832	5.96303	5	ACLY	SUCLA2	DLST	DLAT	SDHD
	DNA replication	0.0030856	4.96919	5	RFC3	PCNA	LIG1	MCM4	DNA2
	Glyoxylate and dicarboxylate metabolism	0.00929573	4.77042	4	GLDC	AFMID	AMT	ACAT1
	Mismatch repair	0.0253832	4.66672	3	RFC3	PCNA	LIG1
	Glycosylphosphatidylinositol (GPI)-anchor biosynthesis	0.0316446	4.29338	3	PIGC	PIGO	PIGW
	Long-term potentiation	0.000542209	4.27202	8	PPP1CB	PPP3CA	CREBBP	MAPK1	PRKCA	BRAF	RAF1	CALM2
	Thyroid cancer	0.01923	3.86791	4	TPM3	MAPK1	BRAF	POLK
	Long-term depression	0.00647742	3.57782	6	PPP2CA	PPP2CB	MAPK1	PRKCA	BRAF	RAF1
	B cell receptor signaling pathway	0.00364108	3.52743	7	GSK3B	PPP3CA	CD81	MAPK1	FOS	RAF1	NFKB1
	Colorectal cancer	0.00278198	3.3282	8	GSK3B	RALA	SMAD4	MAPK1	BRAF	POLK	FOS	RAF1
	Chronic myeloid leukemia	0.00531446	3.29536	7	SMAD4	MAPK1	PTPN11	BRAF	POLK	RAF1	NFKB1
	Renal cell carcinoma	0.0125831	3.11115	6	CREBBP	MAPK1	PTPN11	BRAF	RAF1	MET
	Endometrial cancer	0.0227769	3.08433	5	GSK3B	MAPK1	BRAF	POLK	RAF1
	Autophagy	0.000941164	3.07469	11	PPP2CA	PPP2CB	RRAGC	LAMP2	MAPK1	ULK1	NRBF2	WIPI2	RAF1	ZFYVE1	ATG4D
	Nucleotide excision repair	0.0418418	3.04495	4	RFC3	CDK7	PCNA	LIG1
	Cysteine and methionine metabolism	0.0418418	3.04495	4	DNMT3B	MTR	MAT2B	ENOPH1
	VEGF signaling pathway	0.0243333	3.03205	5	PPP3CA	MAPKAPK3	MAPK1	PRKCA	RAF1
	Adherens junction	0.0152997	2.98151	6	CREBBP	SMAD4	YES1	MAPK1	LMO7	MET
	Lysosome	0.00239398	2.90879	10	GALC	AP3M1	GAA	LAMP2	CTSZ	M6PR	SLC17A5	AP1S1	AP3S1	SGSH
	Cell cycle	0.00254059	2.88534	10	GSK3B	CREBBP	SMAD4	CDK7	STAG2	TFDP1	PCNA	MCM4	YWHAH	MAD2L1
	Glioma	0.0183979	2.86225	6	MAPK1	PRKCA	BRAF	POLK	RAF1	CALM2
	Pertussis	0.0195193	2.82459	6	ITGB2	MAPK1	FOS	TICAM1	CALM2	NFKB1
	TGF-beta signaling pathway	0.01304	2.78275	7	PPP2CA	PPP2CB	CREBBP	SMAD4	TFDP1	MAPK1	SMAD5
	Hepatitis C	0.00140267	2.76992	12	PPP2CA	GSK3B	PPP2CB	TBK1	CD81	MAPK1	BRAF	TICAM1	RAF1	NFKB1	IRF9	YWHAH
	mRNA surveillance pathway	0.0137976	2.75217	7	PPP1CB	PPP2CA	PPP2CB	NUDT21	DAZAP1	SSU72	SYMPK
	Non-small cell lung cancer	0.0371406	2.71047	5	MAPK1	PRKCA	BRAF	POLK	RAF1
	Neurotrophin signaling pathway	0.00623084	2.70591	9	GSK3B	RIPK2	KIDINS220	MAPK1	BRAF	PTPN11	RAF1	CALM2	NFKB1
	Amphetamine addiction	0.0414329	2.63075	5	PPP1CB	PPP3CA	PRKCA	FOS	CALM2
	Prostate cancer	0.0190157	2.58193	7	GSK3B	CREBBP	TMPRSS2	MAPK1	BRAF	RAF1	NFKB1
	Dopaminergic synapse	0.0113842	2.45804	9	PPP1CB	PPP2CA	GSK3B	PPP3CA	PPP2CB	GNG10	PRKCA	FOS	CALM2
	Hepatitis B	0.00621582	2.41448	11	CREBBP	SMAD4	TBK1	PCNA	MAPK1	PRKCA	BRAF	FOS	TICAM1	RAF1	NFKB1
	C-type lectin receptor signaling pathway	0.0266871	2.40815	7	PPP3CA	MAPK1	PTPN11	RAF1	CALM2	NFKB1	IRF9
	Th17 cell differentiation	0.03054	2.34063	7	PPP3CA	SMAD4	MAPK1	AHR	IL1RAP	FOS	NFKB1
	Tight junction	0.00842727	2.31506	11	ACTR3	PPP2CA	EPB41L4B	PPP2CB	PCNA	TUBAL3	MICALL2	SYMPK	ARHGAP17	SYNPO	TJAP1
	Viral carcinogenesis	0.00441185	2.31401	13	CREBBP	GSN	GTF2B	HPN	HIST1H2BK	UBE3A	RBPJ	NFKB1	HIST1H4H	MAPK1	HIST1H2BG	IRF9	YWHAH
	Kaposi sarcoma-associated herpesvirus infection	0.00621971	2.30827	12	GSK3B	PPP3CA	GNG10	CREBBP	TBK1	MAPK1	FOS	TICAM1	RAF1	CALM2	NFKB1	IRF9
	Influenza A	0.00878746	2.30152	11	GSK3B	CREBBP	TBK1	TMPRSS2	MAPK1	PRKCA	FURIN	TICAM1	RAF1	NFKB1	IRF9
	Oocyte meiosis	0.0242176	2.2898	8	PPP1CB	PPP2CA	PPP3CA	PPP2CB	MAPK1	CALM2	YWHAH	MAD2L1
	Hippo signaling pathway	0.0146552	2.23614	10	PPP1CB	PPP2CA	GSK3B	PPP2CB	SMAD4	LATS2	ITGB2	TP53BP2	CSNK1E	YWHAH
	Tuberculosis	0.0121146	2.19866	11	EEA1	PPP3CA	CREBBP	VDR	RIPK2	LAMP2	ITGB2	MAPK1	RAF1	CALM2	NFKB1
	Thyroid hormone signaling pathway	0.0442845	2.15903	7	GSK3B	CREBBP	MAPK1	PRKCA	MED4	RAF1	SLC9A1
	Insulin signaling pathway	0.0387327	2.08924	8	PPP1CB	GSK3B	GYS1	MAPK1	BRAF	RAF1	PHKA2	CALM2
	Wnt signaling pathway	0.0337201	2.038	9	GSK3B	PPP3CA	CREBBP	SMAD4	DAAM1	SIAH1	PRKCA	CSNK1E	LGR4
	Alcoholism	0.0302576	1.98768	10	PPP1CB	GNG10	H3F3A	HIST1H2BK	HIST1H4H	MAPK1	BRAF	HIST1H2BG	RAF1	CALM2
	Ras signaling pathway	0.0304813	1.8506	12	GNG10	RALA	TBK1	PLA2G2A	MAPK1	PRKCA	SHOC2	PTPN11	RAF1	CALM2	MET	NFKB1
	Endocytosis	0.0422254	1.75958	12	EEA1	CYTH3	SNX4	GIT2	BIN1	VTA1	GBF1	CHMP2B	STAM	RAB11FIP3	AP2A2	SNX6
Module	KEGG Terms	P-value	Odds Ratio	N. genes	Genes
Brown	Phosphonate and phosphinate metabolism	0.00979565	12.5786	2	PCYT1A	CHPT1
T2 interval	Riboflavin metabolism	0.0176535	9.43396	2	RFK	ACP2
	Ubiquinone and other terpenoid-quinone biosynthesis	0.0329051	6.86106	2	VKORC1	COQ5
	Mismatch repair	0.00289247	6.56276	4	RFC1	MSH2	MSH3	RPA1
	RNA polymerase	0.00123194	6.08643	5	POLR3A	POLR3C	POLR3D	POLR3H	POLR3K
	DNA replication	0.00245205	5.24109	5	RNASEH2C	PRIM2	RFC1	PRIM1	RPA1
	p53 signaling pathway	0.000623241	4.19287	8	CASP9	TP53I3	GADD45A	SESN1	CCNG2	CCNG1	MDM4	BBC3
	Cytosolic DNA-sensing pathway	0.00135294	4.19287	7	NFKBIA	POLR3A	POLR3C	POLR3D	IL18	POLR3H	POLR3K
	Colorectal cancer	0.000452907	3.9491	9	CASP9	MSH2	MSH3	GADD45A	RAC3	AREG	HRAS	BBC3	EREG
	VEGF signaling pathway	0.00462142	3.83754	6	CASP9	SPHK2	SRC	MAPKAPK2	RAC3	HRAS
	Glyoxylate and dicarboxylate metabolism	0.0442529	3.77358	3	CAT	ACO1	ACSS1
	Sphingolipid metabolism	0.0354822	3.21156	4	GAL3ST1	SPHK2	DEGS1	GLA
	Shigellosis	0.0288412	2.90276	5	ITGB1	NFKBIA	ROCK1	ARPC2	SRC
	Adipocytokine signaling pathway	0.0360556	2.73448	5	NFKBIA	PRKAB2	ACSL1	PPARA	ADIPOR1
	Peroxisome	0.0228525	2.72789	6	PHYH	PEX19	ACSL1	CAT	PEX1	SLC27A2
	Adherens junction	0.0421338	2.62055	5	CDH1	SRC	SNAI1	RAC3	ACTN4
	Hippo signaling pathway	0.003653	2.59434	11	PPP1CC	FZD5	CDH1	WWC1	SCRIB	DCHS1	AMH	BMP7	AREG	LLGL2	BBC3
	FoxO signaling pathway	0.00862026	2.5729	9	RBL2	PRKAB2	CDKN1B	BCL6	GADD45A	CCNG2	CAT	HRAS	KLF2
	AMPK signaling pathway	0.0146225	2.51572	8	CCNA2	PRKAB2	PPP2R3C	SCD	STRADB	HMGCR	ADIPOR1	CFTR
	Insulin resistance	0.0248513	2.44584	7	NFKBIA	PPP1CC	PYGB	PRKAB2	PPARA	SLC27A2	PPARGC1B
	Cell cycle	0.017503	2.43457	8	CCNA2	RBL2	ZBTB17	WEE1	CDKN1B	GADD45A	TTK	BUB1
	Small cell lung cancer	0.037138	2.43457	6	ITGB1	CASP9	NFKBIA	ZBTB17	CDKN1B	GADD45A
	Prostate cancer	0.0441566	2.33418	6	NFKBIA	CASP9	CDKN1B	HSP90AB1	SPINT1	HRAS
	Viral carcinogenesis	0.00752702	2.25289	12	NFKBIA	CCNA2	RBL2	CDKN1B	HDAC3	SRC	PSMC1	MAPKAPK2	SCRIB	ACTN4	HRAS	HDAC7
	Tight junction	0.0154111	2.21976	10	ITGB1	PRKAB2	ROCK1	SRC	MARVELD3	SCRIB	ACTN4	ACTR3B	CFTR	LLGL2
	Sphingolipid signaling pathway	0.0391501	2.21976	7	ROCK1	SPHK2	PPP2R3C	GNAI3	RAC3	DEGS1	HRAS
	Ubiquitin mediated proteolysis	0.0296573	2.20355	8	CUL7	ITCH	UBE2Q1	UBE2R2	FANCL	TRIM37	RHOBTB2	CUL4B
	Axon guidance	0.0227752	2.08485	10	ITGB1	ROCK1	SRC	RASA1	GNAI3	RAC3	SRGAP1	BMP7	HRAS	RHOD
	Endocytosis	0.0136176	2.01052	13	PDCD6IP	SRC	CLTA	VPS37B	ARFGAP3	RAB22A	ITCH	RAB31	ARPC2	CHMP1A	CHMP2A	HRAS	ARF5

## Sheet: CS group
List of over-represented KEGG terms for module genes found for CS group. Highest odds ratio-ranked terms appear in bold. Time interval boxes in red or green indicate respectively module positively or negatively correlated with specific time-interval.
Module	KEGG Terms	P-value	Odds Ratio	N. genes	Genes
Turquoise	Glyoxylate and dicarboxylate metabolism	0.000428698	3.71517	9	GCSH	MCEE	MDH1	PCCA	GLYCTK	CAT	AMT	HYI	ACO1
T0 interval	Porphyrin and chlorophyll metabolism	0.000377532	3.2434	11	UGT2B10	ALAS1	UROD	MMAB	HMBS	CPOX	BLVRB	HCCS	GUSB	BLVRA	UGT1A6
	Legionellosis	8.76951e-05	3.15227	14	HSPA8	SAR1A	SAR1B	BNIP3	ITGB2	CXCL2	CASP9	NFKBIA	BCL2L13	CYCS	CD14	SEC22B	TLR2	HSPA1A
	One carbon pool by folate	0.0189772	3.09598	5	MTHFD1L	MTHFD2	AMT	MTR	GART
	Peroxisome	7.19071e-06	2.98407	20	PEX19	NOS2	ACSL1	PEX11A	PEX11B	PEX10	PEX1	SOD2	PEX13	DHRS4	SOD1	GNPAT	HMGCL	ACOX2	CAT	AGPS	PXMP4	MPV17	CRAT	PAOX
	Prion diseases	0.00581663	2.83061	8	STIP1	PRNP	C8G	HSPA5	MAPK1	FYN	SOD1	HSPA1A
	Glycine, serine and threonine metabolism	0.00393573	2.78638	9	GCSH	ALAS1	GLYCTK	PGAM1	CTH	AMT	SARDH	BPGM	PSPH
	N-Glycan biosynthesis	0.00181242	2.72446	11	B4GALT2	B4GALT3	ALG8	ST6GAL1	DPM3	FUT8	DAD1	ALG5	ALG14	MGAT3	ALG11
	Propanoate metabolism	0.0123672	2.70898	7	MCEE	ALDH6A1	ECHS1	PCCA	ECHDC1	ABAT	LDHAL6A
	Mismatch repair	0.0336999	2.69215	5	MSH6	RFC4	MSH3	POLD1	PMS2
	Valine, leucine and isoleucine degradation	0.00438634	2.57998	10	HADHB	HMGCL	MCEE	ALDH6A1	ECHS1	ALDH1B1	PCCA	ABAT	HMGCS2	ACSF3
	Vitamin digestion and absorption	0.0398291	2.57998	5	SCARB1	SLC23A1	SLC19A3	APOA1	SLC19A2
	Pentose phosphate pathway	0.0303797	2.47678	6	RPIA	GLYCTK	PGLS	TKT	PGM1	RBKS
	Bladder cancer	0.0153656	2.41637	8	RB1	MMP1	ERBB2	DAPK3	E2F1	MAPK1	FGFR3	EGFR
	beta-Alanine metabolism	0.0351825	2.39688	6	ALDH6A1	ECHS1	ALDH1B1	ABAT	UPB1	SRM
	Cysteine and methionine metabolism	0.0117973	2.37139	9	GCLC	GOT1	MDH1	CTH	DNMT3A	DNMT3B	MTR	LDHAL6A	SRM
	Thyroid cancer	0.0266381	2.3429	7	RXRA	TFG	PAX8	GADD45A	MAPK1	POLK	DDB2
	Endocrine and other factor-regulated calcium reabsorption	0.0135075	2.32198	9	ADCY9	KLK1	VDR	ATP1A4	CLTA	PTH1R	ATP2B1	PLCB1	AP2A2
	Amino sugar and nucleotide sugar metabolism	0.0135075	2.32198	9	GMDS	UXS1	AMDHD2	MPI	UAP1L1	GFPT1	PMM2	PGM1	GNE
	Fanconi anemia pathway	0.0103376	2.29331	10	RAD51C	RAD51	RMI1	UBE2T	PMS2	POLK	FANCE	FANCG	FANCF	ATR
	p53 signaling pathway	0.00467259	2.23598	13	GADD45A	SHISA5	DDB2	CASP9	CCNB2	TP53I3	CCNE1	PERP	CCNG2	SESN2	CYCS	MDM4	ATR
	Colorectal cancer	0.00349877	2.15998	15	APC2	GADD45A	AXIN2	FOS	EGFR	EREG	DDB2	CASP9	MSH6	MSH3	RPS6KB2	BIRC5	MAPK1	CYCS	POLK
	Pancreatic cancer	0.00666427	2.14654	13	RB1	RALBP1	CHUK	GADD45A	EGFR	DDB2	CASP9	RAD51	ERBB2	RPS6KB2	E2F1	MAPK1	POLK
	Endometrial cancer	0.0168388	2.13516	10	CASP9	APC2	GADD45A	ERBB2	CTNNA1	MAPK1	POLK	AXIN2	EGFR	DDB2
	Small cell lung cancer	0.00301205	2.13056	16	RB1	CHUK	NOS2	GADD45A	LAMA4	LAMC2	DDB2	CASP9	NFKBIA	RXRA	TRAF4	COL4A2	CCNE1	E2F1	CYCS	POLK
	Glycosaminoglycan biosynthesis	0.024904	2.10293	9	B4GALT2	B4GALT3	NDST1	FUT8	CHSY1	CHST12	B3GNT2	HS6ST1	HS6ST2
	Non-small cell lung cancer	0.0159695	2.06398	11	RB1	CASP9	RXRA	GADD45A	ERBB2	E2F1	PLCG2	MAPK1	POLK	EGFR	DDB2
	Pathogenic Escherichia coli infection	0.0309619	2.02646	9	TUBA1B	TUBB2B	TUBB2A	KRT18	YWHAQ	ARPC2	TUBB	FYN	CD14
	Lysosome	0.00198593	2.01364	20	ARSA	CD63	PSAPL1	SLC11A2	AP3D1	CLTA	NAGA	GNS	SUMF1	PLA2G15	AP4M1	GALC	AP3M1	PSAP	SLC17A5	CTSH	AP3S2	AP3S1	GUSB	CTSC
	Protein processing in endoplasmic reticulum	0.000751661	1.9514	26	HSP90AB1	SAR1A	SAR1B	DERL1	DERL2	RRBP1	HSPH1	BAG2	BAG1	FBXO6	SEC23B	HSPA8	XBP1	SEC24A	HSPA5	EIF2AK1	SSR3	DNAJB12	EIF2AK2	RBX1	DAD1	DNAJB11	DNAJC10	STUB1	CALR	HSPA1A
	Antigen processing and presentation	0.0200997	1.92996	12	HSPA8	CD4	HSP90AB1	HSPA5	NFYB	PSME3	RFX5	TAP2	TAP1	RFXANK	CALR	HSPA1A
	Central carbon metabolism in cancer	0.0347922	1.90522	10	SLC7A5	PDHA1	GLS2	PGAM1	ERBB2	MAPK1	SLC16A3	FGFR3	EGFR	SIRT3
	Glioma	0.0377522	1.81631	11	RB1	GADD45A	E2F1	PLCG2	PDGFA	MAPK1	POLK	CALM1	CALM2	EGFR	DDB2
	HIF-1 signaling pathway	0.0299029	1.73375	14	EGLN1	PDHA1	NOS2	IFNGR1	ENO2	EGFR	RBX1	ERBB2	RPS6KB2	PLCG2	PGK1	MAPK1	LTBR	EIF4E
	Epstein-Barr virus infection	0.0061846	1.66351	27	RB1	TRADD	RBPJ	ICAM1	CASP9	PSMD4	PLCG2	E2F1	POLK	LYN	IFNAR2	CHUK	GADD45A	STAT2	TAP2	EIF2AK2	TAP1	DDB2	SAP30	MAPK13	NFKBIA	PSMC5	CCNE1	CYCS	CALR	NFKBIE	TLR2
	Toxoplasmosis	0.0382865	1.64388	15	HSPA8	CHUK	NOS2	IFNGR1	IL10RB	LAMA4	LAMC2	GNAI2	MAPK13	NFKBIA	CASP9	CYCS	MAPK1	TLR2	HSPA1A
	Ubiquitin mediated proteolysis	0.0273672	1.62708	18	PIAS3	DET1	UBE2I	UBE3A	WWP2	PIAS2	PML	RBX1	ANAPC11	DDB2	CUL4A	UBE2NL	UBE2N	TRIP12	STUB1	BTRC	UBE2K	TRIM32
	Cell cycle	0.0415386	1.59792	16	RB1	CDKN1C	CCNH	GADD45A	RBX1	ANAPC11	CCNB2	PTTG1	YWHAQ	TFDP2	ESPL1	CCNE1	E2F1	MCM5	BUB1	ATR
	Gastric cancer	0.0314222	1.57916	19	RB1	APC2	FZD4	GADD45A	REG4	AXIN2	EGFR	DDB2	FRAT2	RXRA	CCNE1	ERBB2	RPS6KB2	E2F1	CTNNA1	MAPK1	POLK	CDH17	WNT3
	Endocytosis	0.00797199	1.57336	31	TSG101	ASAP3	AGAP1	CLTA	AP2A2	EGFR	SNX1	SNX2	GRK5	CAPZB	CHMP1A	VPS36	RAB11FIP4	RAB11FIP5	HSPA8	IQSEC1	CAV2	GBF1	PML	ARFGAP2	ARPC2	PARD3	CHMP2B	CHMP4A	FGFR3	SMAP1	FOLR1	SPG21	RAB7A	ARF6	HSPA1A
	Apoptosis	0.0396525	1.55881	18	CHUK	PARP1	GADD45A	PARP2	TRADD	DAB2IP	FOS	CFLAR	NFKBIA	CASP9	TUBA1B	AIFM1	CYCS	CTSH	BIRC5	MAPK1	CTSC	BOK
	Adrenergic signaling in cardiomyocytes	0.0445222	1.53731	18	TPM4	CREM	ATP1A4	ATP2B4	ATP2A2	PPP2R5C	ATP2B1	AGT	GNAI2	MAPK13	CREB3	ADCY9	PPP2R3C	MAPK1	TNNI3	CALM1	PLCB1	CALM2
	Kaposi sarcoma-associated herpesvirus infection	0.0267639	1.53134	23	RB1	IFNAR2	LYN	CHUK	IFNGR1	TRADD	STAT2	EIF2AK2	FOS	GNG12	CXCL2	ICAM1	MAPK13	NFKBIA	CASP9	ZFP36	PLCG2	E2F1	CYCS	MAPK1	CALM1	CALM2	MICB
	Pathways in cancer	0.000468882	1.51878	45	RB1	HSP90AB1	LAMC2	CASP9	FRAT2	TFG	PIM1	POLK	APC2	IFNAR2	RALBP1	CHUK	IFNGR1	MMP1	PLEKHG5	DAPK3	FOS	AXIN2	DDB2	RBX1	MSH6	ADCY9	PAX8	SMO	TRAF4	COL4A2	MSH3	CCNE1	BIRC5	PLCB1	CSF1R	CTBP1	LAMA4	PDGFA	MGST2	EGFR	FOXO1	GNAI2	RXRA	ERBB2	PLCG2	E2F1	CTNNA1	MAPK1	WNT3
	Human immunodeficiency virus 1 infection	0.021405	1.51878	26	TRADD	PXN	GNAI2	CASP9	CCNB2	PLCG2	PAK6	MAPK1	BTRC	CHUK	TAP2	TAP1	FOS	GNG12	RBX1	MAPK13	NFKBIA	CUL4A	CD4	RPS6KB2	CYCS	CALR	CALM1	CALM2	ATR	TLR2
	RNA transport	0.0441413	1.50108	20	RANBP2	PRMT5	EIF2B3	UBE2I	EIF1AY	ELAC2	PABPC4	EIF4A3	MAGOHB	RANGAP1	FXR1	EIF5	TACC3	STRAP	EIF4E	EIF4G2	EIF4B	RAN	EIF4G1	EIF3B
Module	KEGG Terms	P-value	Odds Ratio	N. genes	Genes
Black	Mismatch repair	0.00268281	10.6477	3	RFC1	EXO1	SSBP1
T1 interval	Long-term depression	9.15144e-05	8.16327	6	MAP2K1	PPP2R1B	GNAI3	PRKCA	BRAF	RAF1
	Bladder cancer	0.00155894	7.96416	4	RASSF1	MAP2K1	BRAF	RAF1
	Non-small cell lung cancer	0.000156236	7.42115	6	RASSF1	MAP2K1	PRKCA	BRAF	PLCG1	RAF1
	DNA replication	0.00962464	6.80272	3	POLE4	RFC1	SSBP1
	Vitamin digestion and absorption	0.0345561	6.80272	2	LMBRD1	APOB
	Glioma	0.00031595	6.53061	6	MAP2K1	PRKCA	BRAF	CALML4	PLCG1	RAF1
	Vibrio cholerae infection	0.00325365	6.53061	4	PRKCA	PLCG1	ACTB	ACTG1
	Long-term potentiation	0.00137844	6.09199	5	MAP2K1	PRKCA	BRAF	CALML4	RAF1
	VEGF signaling pathway	0.00590306	5.53442	4	MAP2K1	PRKCA	PLCG1	RAF1
	Parathyroid hormone synthesis, secretion and action	0.00033073	5.39084	7	AKAP13	MAP2K1	GNAI3	PDE4A	PRKCA	BRAF	RAF1
	Serotonergic synapse	0.000487598	5.05689	7	MAP2K1	DUSP1	GNAI3	PRKCA	BRAF	RAF1	GNG13
	Arginine and proline metabolism	0.0221206	4.99792	3	ALDH3A2	CKMT1A	AMD1
	Acute myeloid leukemia	0.00874843	4.94743	4	MAP2K1	BRAF	PIM2	RAF1
	Thyroid hormone signaling pathway	0.000570762	4.92611	7	RCAN1	MAP2K1	PRKCA	PLCG1	RAF1	ACTB	ACTG1
	ErbB signaling pathway	0.00392035	4.80192	5	MAP2K1	PRKCA	BRAF	PLCG1	RAF1
	Fc epsilon RI signaling pathway	0.00970032	4.80192	4	MAP2K1	PRKCA	PLCG1	RAF1
	Pathogenic Escherichia coli infection	0.02987	4.45269	3	PRKCA	ACTB	ACTG1
	GnRH signaling pathway	0.0057421	4.38885	5	MAP2K1	LHB	PRKCA	CALML4	RAF1
	Gastric acid secretion	0.0135526	4.35374	4	GNAI3	PRKCA	CALML4	ACTB
	Oxytocin signaling pathway	0.00060887	4.26837	8	RCAN1	MAP2K1	GNAI3	PRKCA	CALML4	RAF1	ACTB	ACTG1
	Endometrial cancer	0.0342135	4.22238	3	MAP2K1	BRAF	RAF1
	Sphingolipid signaling pathway	0.00348879	4.11593	6	MAP2K1	PPP2R1B	GNAI3	PRKCA	PPP2R5D	RAF1
	Neurotrophin signaling pathway	0.00348879	4.11593	6	MAP2K1	MAGED1	BRAF	CALML4	PLCG1	RAF1
	Melanogenesis	0.00809175	4.04122	5	MAP2K1	GNAI3	PRKCA	CALML4	RAF1
	Dopaminergic synapse	0.00556932	3.7389	6	PPP2R1B	GNAI3	PRKCA	PPP2R5D	CALML4	GNG13
	Gap junction	0.0230139	3.71058	4	MAP2K1	GNAI3	PRKCA	RAF1
	Leukocyte transendothelial migration	0.0123087	3.64431	5	GNAI3	PRKCA	PLCG1	ACTB	ACTG1
	Morphine addiction	0.0256472	3.58825	4	GNAI3	PDE4A	PRKCA	GNG13
	Fc gamma R-mediated phagocytosis	0.0256472	3.58825	4	MAP2K1	PRKCA	PLCG1	RAF1
	Rap1 signaling pathway	0.00102465	3.56648	9	MAP2K1	GNAI3	PRKCA	BRAF	CALML4	PLCG1	RAF1	ACTB	ACTG1
	Fluid shear stress and atherosclerosis	0.00738528	3.52371	6	SUMO1	DUSP1	SUMO3	CALML4	ACTB	ACTG1
	Ras signaling pathway	0.000605085	3.51865	10	RASSF1	MAP2K1	RAB5C	NF1	PRKCA	CALML4	PLCG1	RAF1	ETS2	GNG13
	Human immunodeficiency virus 1 infection	0.00125212	3.46554	9	MAP2K1	GNAI3	AP1S1	PRKCA	CALML4	PLCG1	RNF7	RAF1	GNG13
	Apoptosis	0.00843814	3.42515	6	MAP2K1	DIABLO	RAF1	MAP3K14	ACTB	ACTG1
	Hepatocellular carcinoma	0.00474036	3.40136	7	MAP2K1	PRKCA	BRAF	PLCG1	RAF1	ACTB	ACTG1
	Circadian entrainment	0.031438	3.36629	4	GNAI3	PRKCA	CALML4	GNG13
	Progesterone-mediated oocyte maturation	0.0335253	3.29829	4	MAP2K1	GNAI3	BRAF	RAF1
	Phosphatidylinositol signaling system	0.0335253	3.29829	4	PI4KA	PRKCA	CALML4	PLCG1
	Choline metabolism in cancer	0.0335253	3.29829	4	MAP2K1	PRKCA	PLCG1	RAF1
	T cell receptor signaling pathway	0.0356917	3.23298	4	MAP2K1	PLCG1	RAF1	MAP3K14
	Alcoholism	0.00685653	3.1746	7	MAP2K1	HIST1H3A	GNAI3	BRAF	CALML4	RAF1	GNG13
	Relaxin signaling pathway	0.0220478	3.13972	5	MAP2K1	GNAI3	PRKCA	RAF1	GNG13
	C-type lectin receptor signaling pathway	0.0390899	3.13972	4	BCL3	CALML4	RAF1	MAP3K14
	Natural killer cell mediated cytotoxicity	0.0227017	3.11575	5	MAP2K1	PRKCA	BRAF	PLCG1	RAF1
	Vascular smooth muscle contraction	0.023368	3.09215	5	MAP2K1	PRKCA	BRAF	CALML4	RAF1
	Apelin signaling pathway	0.0268891	2.97929	5	MAP2K1	GNAI3	CALML4	RAF1	GNG13
	Focal adhesion	0.01154	2.8715	7	MAP2K1	ITGB4	PRKCA	BRAF	RAF1	ACTB	ACTG1
	Proteoglycans in cancer	0.0121412	2.84293	7	MAP2K1	PRKCA	BRAF	PLCG1	RAF1	ACTB	ACTG1
	Thermogenesis	0.00780272	2.8271	8	COX19	COX7A2L	NDUFB5	COX17	ACSL5	SDHC	ACTB	ACTG1
	Adrenergic signaling in cardiomyocytes	0.0331944	2.81492	5	PPP2R1B	GNAI3	PRKCA	PPP2R5D	CALML4
	mTOR signaling pathway	0.0394083	2.68528	5	MAP2K1	SEC13	PRKCA	BRAF	RAF1
	Kaposi sarcoma-associated herpesvirus infection	0.0273051	2.63331	6	RCAN1	MAP2K1	CALML4	PLCG1	RAF1	GNG13
	Human cytomegalovirus infection	0.0212145	2.53968	7	AKAP13	MAP2K1	GNAI3	PRKCA	CALML4	RAF1	GNG13
	MAPK signaling pathway	0.0294234	2.21377	8	MAP2K1	DUSP1	NF1	PRKCA	BRAF	RAF1	MAP3K14	DUSP16
Module	KEGG Terms	P-value	Odds Ratio	N. genes	Genes
Magenta	Ferroptosis	0.000107175	10.5042	5	FTH1	PCBP2	SLC40A1	ATG5	FTL
T2 interval	N-Glycan biosynthesis	0.000313319	8.40336	5	MAN2A1	RPN1	STT3A	MGAT2	DDOST
	beta-Alanine metabolism	0.00584933	8.13229	3	SMOX	ACADM	ALDH9A1
	Ascorbate and aldarate metabolism	0.0407223	6.22471	2	RGN	ALDH9A1
	Cell cycle	0.00012024	5.42152	8	CDKN1B	TFDP1	PCNA	CDC27	CDK2	BUB3	ANAPC1	CDC14B
	Nucleotide excision repair	0.0183671	5.36385	3	PCNA	CETN2	GTF2H4
	Cysteine and methionine metabolism	0.0183671	5.36385	3	DNMT1	MAT2B	BCAT2
	Valine, leucine and isoleucine degradation	0.0194233	5.2521	3	ACADM	BCAT2	ALDH9A1
	Prostate cancer	0.00106907	5.19796	6	HSP90AA1	CDKN1B	BAD	TCF7	CDK2	PTEN
	Mineral absorption	0.0227897	4.94315	3	FTH1	SLC40A1	FTL
	TGF-beta signaling pathway	0.00442773	4.66853	5	TFDP1	AMH	BMP7	RHOA	BMPR1A
	mRNA surveillance pathway	0.00464069	4.61723	5	NXT1	PPP2R5E	NCBP2	SSU72	SYMPK
	Pathogenic Escherichia coli infection	0.0277398	4.58365	3	ARPC1B	ARHGEF2	RHOA
	Endometrial cancer	0.0317971	4.34657	3	BAD	TCF7	PTEN
	Peroxisome	0.0172822	4.04981	4	ABCD4	PHYH	ABCD3	PEX12
	Tight junction	0.00100312	3.95452	8	PCNA	MAP3K1	MARVELD2	SYMPK	ARHGEF2	F11R	TJAP1	RHOA
	Colorectal cancer	0.0194328	3.90854	4	BAD	TCF7	AREG	RHOA
	Central carbon metabolism in cancer	0.0423977	3.87847	3	SCO2	PTEN	HIF1A
	Fluid shear stress and atherosclerosis	0.00644215	3.62735	6	HSP90AA1	MGST1	ARHGEF2	RHOA	BMPR1A	TNFRSF1A
	Protein processing in endoplasmic reticulum	0.00367078	3.56506	7	HSP90AA1	RPN1	DNAJA2	STT3A	DDOST	HERPUD1	UBQLN2
	Human T-cell leukemia virus 1 infection	0.00128327	3.45344	9	MAP3K1	CDC27	CDK2	PTEN	BUB3	HLA-DRB3	IL2RG	ANAPC1	TNFRSF1A
	Progesterone-mediated oocyte maturation	0.0306126	3.3953	4	HSP90AA1	CDC27	CDK2	ANAPC1
	Ribosome	0.010102	3.29544	6	MRPL3	MRPS15	RPL34	MRPS12	RPL7	RPS12
	Th17 cell differentiation	0.0390401	3.14144	4	HSP90AA1	HLA-DRB3	IL2RG	HIF1A
	Necroptosis	0.0131189	3.11236	6	HSP90AA1	FTH1	TNFRSF10B	CHMP7	FTL	TNFRSF1A
	Ubiquitin mediated proteolysis	0.0241163	3.06692	5	MAP3K1	UBE2R2	UBE2S	CDC27	ANAPC1
	Measles	0.0247889	3.0447	5	CDKN1B	IRAK1	BAD	CDK2	IL2RG
	Hepatocellular carcinoma	0.01545	3.0012	6	SMARCD1	BAD	TCF7	MGST1	PTEN	BRD7
	Hippo signaling pathway	0.0427041	2.62605	5	TCF7	AMH	BMP7	AREG	BMPR1A
Module	KEGG Terms	P-value	Odds Ratio	N. genes	Genes
Pink	One carbon pool by folate	0.0238192	8.29876	2	MTHFD1	SHMT1
T2 interval	RNA polymerase	0.00605531	8.03105	3	POLR3A	POLR3C	POLR3F
	Vibrio cholerae infection	0.00306736	6.639	4	ADCY3	SEC61B	CFTR	ATP6V0A1
	Glycine, serine and threonine metabolism	0.0122963	6.22407	3	GRHPR	SHMT1	CHDH
	Ovarian steroidogenesis	0.0211935	5.08087	3	HSD17B2	ADCY3	ADCY6
	Gastric acid secretion	0.0128259	4.426	4	ADCY3	CAMK2G	CFTR	ADCY6
	Glycerolipid metabolism	0.0372999	4.08136	3	LIPC	DGAT2	AGPAT2
	Cytosolic DNA-sensing pathway	0.0404503	3.95179	3	POLR3A	POLR3C	POLR3F
	Fluid shear stress and atherosclerosis	0.00683491	3.5822	6	MEF2A	NOS3	GSTA2	SDC1	RAC3	HSP90B1
	Oocyte meiosis	0.0177951	3.3195	5	YWHAB	ADCY3	CAMK2G	YWHAG	ADCY6
	C-type lectin receptor signaling pathway	0.0371542	3.19183	4	PAK1	CBLB	LSP1	IRF9
	Parathyroid hormone synthesis, secretion and action	0.0394134	3.13161	4	MEF2A	MMP24	ADCY3	ADCY6
	Oxytocin signaling pathway	0.0380294	2.71201	5	RGS2	NOS3	ADCY3	CAMK2G	ADCY6
	Viral carcinogenesis	0.0352642	2.47724	6	YWHAB	HLA-B	HIST1H4H	GTF2E1	YWHAG	IRF9
	cAMP signaling pathway	0.0438167	2.3487	6	PAK1	RAC3	ADCY3	CAMK2G	CFTR	ADCY6
[truncated: 20 more columns]

## Sheet: CC group
List of over-represented KEGG terms for module genes found for CC group. Highest odds ratio-ranked terms appear in bold. Time interval boxes in red or green indicate respectively module positively or negatively correlated with specific time-interval.
Module	KEGG Terms	P-value	Odds Ratio	N. genes	Genes
Yellow	Riboflavin metabolism	0.0211377	8.57633	2	ENPP1	BLVRB
T0 interval	Mismatch repair	0.000450194	7.45768	5	MSH6	POLD4	RFC4	MSH3	POLD1
	Glyoxylate and dicarboxylate metabolism	0.00161153	5.71755	5	GCSH	MCEE	MDH1	GLYCTK	CAT
	Glycosylphosphatidylinositol (GPI)-anchor biosynthesis	0.00555466	5.48885	4	PIGA	PIGP	PIGZ	PIGG
	DNA replication	0.00369368	4.76463	5	PRIM2	POLD4	RFC4	PRIM1	POLD1
	Pentose phosphate pathway	0.0107324	4.57404	4	GLYCTK	RGN	PGLS	RBKS
	Glycine, serine and threonine metabolism	0.00586145	4.28816	5	GCSH	GLYCTK	BPGM	SDSL	PSPH
	Homologous recombination	0.00651883	4.18358	5	POLD4	RAD51	POLD1	BRCC3	BRCA1
	Endometrial cancer	0.00143059	4.1403	7	GSK3B	BAD	TCF7	ARAF	PTEN	CTNNA1	POLK
	Small cell lung cancer	8.23669e-05	4.05762	11	RB1	NFKBIA	CDKN1B	TRAF4	COL4A2	CCNE1	PTEN	LAMC2	POLK	CKS1B	BCL2L1
	Alanine, aspartate and glutamate metabolism	0.0182996	3.92061	4	ALDH4A1	GOT1	GAD1	ABAT
	Prostate cancer	0.000121027	3.89029	11	RB1	NFKBIA	GSK3B	CREB3	CDKN1B	CCNE1	BAD	TCF7	PDGFC	ARAF	PTEN
	Chronic myeloid leukemia	0.00164291	3.61109	8	RB1	NFKBIA	CDKN1B	CTBP1	BAD	ARAF	POLK	BCL2L1
	Amyotrophic lateral sclerosis (ALS)	0.0161309	3.36327	5	BAD	CAT	GRIN2C	MAPK13	BCL2L1
	Tryptophan metabolism	0.0333945	3.26717	4	DDC	CAT	CYP1A1	DHTKD1
	Colorectal cancer	0.00359153	3.19119	8	MSH6	GSK3B	MSH3	BAD	TCF7	ARAF	BIRC5	POLK
	Renal cell carcinoma	0.0152061	2.98307	6	EGLN1	FLCN	PAK1	BAD	ARAF	HIF1A
	Melanoma	0.0184353	2.85878	6	RB1	BAD	PDGFC	ARAF	PTEN	POLK
	Pancreatic cancer	0.0221046	2.74443	6	RB1	RAD51	BAD	ARAF	POLK	BCL2L1
	Measles	0.00725559	2.48589	10	NFKBIA	GSK3B	CDKN1B	CCNE1	BAD	STAT2	EIF2AK2	EIF3H	IRF9	BCL2L1
	Hepatocellular carcinoma	0.00386446	2.45038	12	RB1	GSK3B	SMARCC2	BAD	TCF7	ARAF	PTEN	KEAP1	MGST2	DVL3	POLK	BCL2L1
	ErbB signaling pathway	0.0377864	2.42155	6	GSK3B	PAK1	CDKN1B	BAD	ARAF	EIF4EBP1
	Gastric cancer	0.0120996	2.30237	10	RB1	GSK3B	CDKN1B	CCNE1	TCF7	ARAF	CTNNA1	DVL3	POLK	CDH17
	Human papillomavirus infection	0.000293815	2.28702	22	RB1	GSK3B	ATP6V0B	CDKN1B	BAD	STAT2	TCF7	PTEN	EIF2AK2	LAMC2	RBPJ	SLC9A3R1	CREB3	COL4A2	NFX1	CCNE1	RHEB	PPP2R3C	PARD3	EIF4EBP1	DVL3	IRF9
	Epstein-Barr virus infection	0.00622332	2.21875	13	RB1	CDKN1B	STAT2	EIF2AK2	RBPJ	SAP30	MAPK13	NFKBIA	CCNE1	POLK	VIM	NFKBIE	IRF9
	RNA transport	0.0230434	2.07911	10	FXR1	UPF2	POP5	PRMT5	UBE2I	NCBP2	EIF4EBP1	EIF3H	PABPC1L	EIF3B
	FoxO signaling pathway	0.0396017	2.07911	8	CDKN1B	PRMT1	PLK2	BNIP3	CAT	ARAF	PTEN	MAPK13
	Viral carcinogenesis	0.0151318	2.04808	12	RB1	NFKBIA	CREB3	CDKN1B	HDAC3	CCNE1	BAD	DNAJA3	HIST1H2BK	EIF2AK2	RBPJ	IRF9
	Alzheimer disease	0.0285822	2.00616	10	GSK3B	ADAM17	NDUFB5	BAD	ATP2A2	UQCRC2	NAE1	GRIN2C	COX7C	COX5A
	Pathways in cancer	0.000446977	1.94181	30	RB1	CSF1R	GSK3B	CDKN1B	CTBP1	TCF7	ARAF	PTEN	KEAP1	MGST2	LAMC2	HIF1A	CKS1B	GNA12	CTNNA1	DVL3	POLK	EGLN1	ARHGEF11	BAD	STAT2	MSH6	NFKBIA	RAD51	TRAF4	COL4A2	MSH3	CCNE1	BIRC5	BCL2L1
	PI3K-Akt signaling pathway	0.0312246	1.64743	17	CSF1R	GSK3B	CDKN1B	BAD	PTEN	LAMC2	BRCA1	CREB3	COL4A2	CCNE1	RHEB	PPP2R3C	PDGFC	EIF4EBP1	EPHA2	MCL1	BCL2L1
Module	KEGG Terms	P-value	Odds Ratio	N. genes	Genes
Red	Thyroid cancer	0.000957399	6.49688	5	NRAS	PAX8	TPM3	GADD45A	MAPK1
T0 interval	RNA polymerase	0.00372189	6.20347	4	POLR1A	POLR1B	POLR1D	POLR3H
	B cell receptor signaling pathway	0.000677445	4.73998	7	PPP3CA	NRAS	MAPK1	RAC1	FOS	PIK3R1	NFKB1
	Colorectal cancer	0.000421955	4.47227	8	NRAS	SMAD3	GADD45A	MAPK1	RAC1	FOS	PIK3R1	AREG
	Chronic myeloid leukemia	0.00101919	4.42814	7	NRAS	SMAD3	GADD45A	MAPK1	PIK3R1	NFKB1	RUNX1
	Non-small cell lung cancer	0.00247825	4.37063	6	NRAS	PDPK1	GADD45A	MAPK1	PIK3R1	STK4
	Renal cell carcinoma	0.00310413	4.1806	6	FH	NRAS	EGLN2	MAPK1	RAC1	PIK3R1
	Endometrial cancer	0.00705521	4.14456	5	NRAS	PDPK1	GADD45A	MAPK1	PIK3R1
	VEGF signaling pathway	0.00757997	4.07432	5	PPP3CA	NRAS	MAPK1	RAC1	PIK3R1
	Drug metabolism	0.000425713	4.00641	9	GSTK1	UCK2	CYP2B6	GSTM1	IMPDH1	UPB1	ITPA	CES1	UGT1A6
	Glycerolipid metabolism	0.00870982	3.94073	5	ALDH1B1	AKR1A1	DGKZ	AGPAT2	MGLL
	Aldosterone-regulated sodium reabsorption	0.0412142	3.89813	3	PDPK1	MAPK1	PIK3R1
	Choline metabolism in cancer	0.00107787	3.885	8	NRAS	PDPK1	PDGFA	MAPK1	PIK3R1	RAC1	FOS	DGKZ
	Pancreatic cancer	0.00470015	3.84615	6	SMAD3	GADD45A	MAPK1	RAC1	PIK3R1	NFKB1
	T cell receptor signaling pathway	0.00122756	3.80807	8	PPP3CA	NRAS	PDPK1	MAPK1	PIK3R1	FOS	MAP3K7	NFKB1
	FoxO signaling pathway	0.000445594	3.64219	10	NRAS	SMAD3	BCL6	GADD45A	PDPK1	CCNG2	MAPK1	PIK3R1	STK4	FOXO1
	Acute myeloid leukemia	0.0120322	3.64219	5	NRAS	MAPK1	PIK3R1	NFKB1	RUNX1
	Fc epsilon RI signaling pathway	0.0135728	3.53507	5	NRAS	PDPK1	MAPK1	RAC1	PIK3R1
	Prostate cancer	0.00413406	3.46947	7	NRAS	PDPK1	PDGFA	MAPK1	PIK3R1	FOXO1	NFKB1
	Prolactin signaling pathway	0.0152409	3.43407	5	NRAS	MAPK1	FOS	PIK3R1	NFKB1
	AGE-RAGE signaling pathway in diabetic complications	0.00488682	3.36538	7	NRAS	SMAD3	MAPK1	PIK3R1	RAC1	FOXO1	NFKB1
	Melanoma	0.0170408	3.33868	5	NRAS	GADD45A	PDGFA	MAPK1	PIK3R1
	Adherens junction	0.0170408	3.33868	5	SMAD3	MAPK1	LMO7	RAC1	MAP3K7
	Glioma	0.019996	3.20513	5	NRAS	GADD45A	PDGFA	MAPK1	PIK3R1
	Th17 cell differentiation	0.00704057	3.14522	7	PPP3CA	SMAD3	MAPK1	AHR	FOS	NFKB1	RUNX1
	Transcriptional misregulation in cancer	0.00054016	3.10174	12	DDX5	CEBPB	BCL6	PAX8	MAX	GADD45A	BMP2K	JMJD1C	PDGFA	FOXO1	NFKB1	RUNX1
	Osteoclast differentiation	0.00511726	3.02847	8	PPP3CA	MAPK1	TNFRSF11B	PIK3R1	RAC1	FOS	MAP3K7	NFKB1
	Ribosome biogenesis in eukaryotes	0.0189312	2.85605	6	UTP6	POP1	RPP40	HEATR1	SBDS	PWP2
	Sphingolipid signaling pathway	0.0122627	2.82805	7	PPP2CB	NRAS	PDPK1	MAPK1	PIK3R1	RAC1	NFKB1
	Neurotrophin signaling pathway	0.0122627	2.82805	7	NRAS	PRDM4	PDPK1	MAPK1	PIK3R1	RAC1	NFKB1
Module	KEGG Terms	P-value	Odds Ratio	N. genes	Genes
Turquoise	Terpenoid backbone biosynthesis	0.00170197	5.52975	5	FDPS	PMVK	PDSS2	HMGCR	ACAT1
T2 interval	Bladder cancer	0.000225072	4.74749	8	MAP2K1	CDH1	MMP1	ERBB2	E2F1	HRAS	EGFR	TYMP
	Citrate cycle (TCA cycle)	0.0070229	4.05515	5	PDHA1	OGDHL	ACO1	SDHD	PCK2
	Pathogenic Escherichia coli infection	0.000372446	3.98142	9	ITGB1	TUBA1B	TUBB2A	ROCK1	ARPC2	CDH1	ARHGEF2	ACTB	RHOA
	Legionellosis	0.000372446	3.98142	9	EEF1A1	BCL2L13	HSPA8	CASP7	ITGB2	CXCL2	RELA	TLR2	HSPA1A
	Arginine and proline metabolism	0.000795185	3.97239	8	ARG2	OAT	NOS3	AMD1	PYCR2	ALDH7A1	ALDH9A1	SRM
	Thyroid cancer	0.00369829	3.94555	6	MAP2K1	RXRA	CDH1	PPARG	HRAS	DDB2
	beta-Alanine metabolism	0.00809587	3.92434	5	ALDH6A1	ACADM	ALDH7A1	SRM	ALDH9A1
	RNA polymerase	0.00809587	3.92434	5	POLR3GL	POLR3C	POLR3D	POLR2F	POLR2H
	Peroxisome	3.20807e-05	3.81086	13	ABCD4	PECR	PHYH	ACSL1	EPHX2	PEX1	PEX13	PMVK	NUDT19	FAR1	SLC27A2	CRAT	PAOX
	Pyruvate metabolism	0.00484224	3.74322	6	PDHA1	ACSS1	ALDH7A1	ACAT1	PCK2	ALDH9A1
	Central carbon metabolism in cancer	0.00129961	3.36889	9	G6PD	MAP2K1	PDHA1	ERBB2	SLC1A5	HRAS	EGFR	FGFR2	SIRT3
	Endometrial cancer	0.00244386	3.35599	8	APC2	MAP2K1	CDH1	ERBB2	AXIN1	HRAS	EGFR	DDB2
	Glyoxylate and dicarboxylate metabolism	0.0332176	3.24412	4	SHMT2	ACO1	ACSS1	ACAT1
	Cysteine and methionine metabolism	0.0120893	3.10607	6	DNMT1	ADI1	CTH	AMD1	DNMT3B	SRM
	Basal cell carcinoma	0.00412705	3.08964	8	APC2	BMP4	SMO	FZD5	FZD4	DVL1	AXIN1	DDB2
	Sphingolipid signaling pathway	0.000109688	3.06692	15	MAP2K1	ROCK1	SPHK2	NOS3	TRADD	PPP2R2A	PPP2R5C	RHOA	RELA	GNAI2	SGPL1	SMPD1	PPP2R2D	PLCB1	HRAS
	Propanoate metabolism	0.0408911	3.04136	4	ALDH6A1	ACADM	ACSS1	ACAT1
	PPAR signaling pathway	0.00323979	2.95916	9	RXRA	MMP1	ACSL1	SCD	DBI	PPARG	ACADM	SLC27A2	PCK2
	Melanogenesis	0.000891117	2.8908	12	MAP2K1	ADCY9	FZD5	CREB3L4	FZD4	DVL1	CALM3	CALML4	PLCB1	HRAS	CAMK2G	GNAI2
	Viral myocarditis	0.0102794	2.88672	7	CXADR	ITGB2	HLA-B	HLA-A	EIF4G3	ACTB	EIF4G1
	Pertussis	0.00388416	2.88129	9	ITGB1	CASP7	IRAK1	ITGB2	CALM3	CALML4	RHOA	RELA	GNAI2
	Oxytocin signaling pathway	5.91381e-05	2.86246	18	PRKAB2	MAP2K1	ROCK1	NOS3	CALML4	ACTB	RHOA	EGFR	GNAI2	PPP1CA	RCAN1	RGS2	ADCY9	CALM3	PPP1R12B	PLCB1	HRAS	CAMK2G
	Fatty acid degradation	0.0335116	2.76488	5	ACSL1	ACADM	ALDH7A1	ACAT1	ALDH9A1
	Prostate cancer	0.00210333	2.75917	11	MAP2K1	HSP90AA1	CREB3L4	ERBB2	E2F1	TMPRSS2	HRAS	FGFR2	RELA	EGFR	HSP90B1
	Estrogen signaling pathway	0.000519907	2.66397	15	HSPA8	MAP2K1	HSP90AA1	NOS3	NCOA3	CALML4	EGFR	HSP90B1	GNAI2	ADCY9	CREB3L4	CALM3	PLCB1	HRAS	HSPA1A
	cGMP-PKG signaling pathway	0.000169762	2.63829	18	VASP	MAP2K1	TRPC6	ROCK1	NOS3	ATP2B4	CALML4	RHOA	GNAI2	PPP1CA	RGS2	ADCY9	CREB3L4	KCNMB4	GTF2IRD1	CALM3	PLCB1	GTF2I
	Shigellosis	0.0170045	2.62025	7	ITGB1	ROCK1	ARPC2	RIPK2	PFN1	ACTB	RELA
	Glioma	0.0117173	2.5953	8	MAP2K1	E2F1	CALM3	CALML4	HRAS	CAMK2G	EGFR	DDB2
	Gastric acid secretion	0.0117173	2.5953	8	ADCY9	CALM3	CALML4	PLCB1	CAMK2G	ACTB	SLC9A1	GNAI2
	Nucleotide excision repair	0.0428631	2.58839	5	CETN2	ERCC2	RPA1	ERCC5	DDB2
	Non-small cell lung cancer	0.0183697	2.58055	7	MAP2K1	RXRA	ERBB2	E2F1	HRAS	EGFR	DDB2
	Platelet activation	0.00178197	2.55082	13	VASP	ITGB1	ROCK1	NOS3	FGG	RASGRP2	ACTB	RHOA	GNAI2	PPP1CA	COL1A1	ADCY9	PLCB1
	Long-term potentiation	0.0198101	2.54203	7	MAP2K1	CALM3	CALML4	PLCB1	HRAS	CAMK2G	PPP1CA
	Glycolysis / Gluconeogenesis	0.0213275	2.50465	7	PDHA1	ADPGK	PGK1	ACSS1	ALDH7A1	ALDH9A1	PCK2
	Neurotrophin signaling pathway	0.00363341	2.45354	12	MAP2K1	IRAK1	RIPK2	CALM3	CALML4	PSEN1	HRAS	CAMK2G	RHOA	RELA	SH2B2	SH2B1
	Fluid shear stress and atherosclerosis	0.00177508	2.45059	14	HSP90AA1	DUSP1	NOS3	CALML4	ACTB	RHOA	RELA	KLF2	HSP90B1	BMP4	GSTA4	SUMO3	CALM3	ARHGEF2
	Gastric cancer	0.00124388	2.44942	15	APC2	MAP2K1	FZD5	FZD4	REG4	AXIN1	EGFR	DDB2	RXRA	CDH1	DVL1	ERBB2	E2F1	HRAS	FGFR2
	mRNA surveillance pathway	0.0124403	2.40635	9	UPF1	CPSF3	EIF4A3	PPP2R2D	PPP2R2A	PPP2R5C	SMG5	SRRM1	PPP1CA
	Regulation of actin cytoskeleton	0.000209291	2.38761	21	APC2	ITGB1	MAP2K1	ROCK1	LIMK2	RDX	ITGB2	ACTB	RHOA	EGFR	PPP1CA	SLC9A1	ABI2	ARPC2	PIP4K2A	ITGA7	ITGA6	PFN1	PPP1R12B	HRAS	FGFR2
	Cushing syndrome	0.00184665	2.3546	15	APC2	MAP2K1	FZD5	FZD4	AXIN1	EGFR	AGT	GNAI2	ADCY9	CREB3L4	DVL1	E2F1	PLCB1	PDE8A	CAMK2G
	Adrenergic signaling in cardiomyocytes	0.00263643	2.34919	14	ATP2B4	PPP2R2A	CALML4	PPP2R5C	AGT	SLC9A1	GNAI2	PPP1CA	ADCY9	CREB3L4	PPP2R2D	CALM3	PLCB1	CAMK2G
	Cytosolic DNA-sensing pathway	0.0443194	2.31723	6	POLR3GL	POLR3C	POLR3D	POLR2F	POLR2H	RELA
	Apelin signaling pathway	0.00427542	2.30877	13	PRKAB2	MAP2K1	SPHK2	NOS3	CALML4	KLF2	SLC9A1	GNAI2	ADCY9	CDH1	CALM3	PLCB1	HRAS
	Thyroid hormone signaling pathway	0.00826431	2.30724	11	BMP4	RCAN1	MAP2K1	RXRA	NCOA3	PLCE1	DIO3	PLCB1	HRAS	ACTB	SLC9A1
	Insulin resistance	0.013458	2.25286	10	PRKAB2	CREB3L4	NOS3	NR1H2	PPP1R3D	SLC27A2	RELA	AGT	PCK2	PPP1CA
	Rap1 signaling pathway	0.00088103	2.24411	19	VASP	ITGB1	MAP2K1	ITGB2	CALML4	RASGRP2	ACTB	RHOA	EGFR	GNAI2	EFNA1	ADCY9	CDH1	PLCE1	CALM3	PFN1	PLCB1	HRAS	FGFR2
	Aldosterone synthesis and secretion	0.0194372	2.23447	9	ADCY9	CREB3L4	ATP2B4	CALM3	CALML4	DAGLB	PLCB1	CAMK2G	AGT
	AMPK signaling pathway	0.0105413	2.23033	11	CCNA2	PRKAB2	CREB3L4	SCD	STRADB	PPP2R2D	PPP2R2A	PPARG	PPP2R5C	HMGCR	PCK2
	Vascular smooth muscle contraction	0.00826596	2.2119	12	MAP2K1	ADCY9	ROCK1	PLA2G2A	KCNMB4	CALM3	CALML4	PPP1R12B	PLCB1	RHOA	AGT	PPP1CA
	Gap junction	0.0281895	2.2119	8	TUBA1B	MAP2K1	TUBB2A	ADCY9	PLCB1	HRAS	EGFR	GNAI2
	Antigen processing and presentation	0.0387221	2.2119	7	HSPA8	HSP90AA1	HLA-B	TAP1	HLA-A	CTSB	HSPA1A
	HIF-1 signaling pathway	0.0218752	2.18978	9	MAP2K1	PDHA1	NOS3	ERBB2	PGK1	LTBR	CAMK2G	RELA	EGFR
	Proteoglycans in cancer	0.00165974	2.17889	18	ITGB1	MAP2K1	FZD5	ROCK1	FZD4	RDX	ACTB	RHOA	EGFR	PPP1CA	SLC9A1	SMO	ERBB2	PLCE1	PPP1R12B	HRAS	CAMK2G	TLR2
	Longevity regulating pathway	0.0245251	2.14684	9	HSPA8	PRKAB2	ADCY9	CREB3L4	EIF4EBP2	PPARG	HRAS	RELA	HSPA1A
	Hippo signaling pathway	0.00635616	2.12895	14	TEAD4	APC2	FZD5	FZD4	ITGB2	AXIN1	PPP2R2A	ACTB	PPP1CA	BMP4	CDH1	DVL1	PPP2R2D	AMH
	IL-17 signaling pathway	0.0374702	2.09298	8	HSP90AA1	MMP1	TRADD	CXCL2	IL17RC	IL17RB	RELA	HSP90B1
	GnRH signaling pathway	0.0374702	2.09298	8	MAP2K1	ADCY9	CALM3	CALML4	PLCB1	HRAS	CAMK2G	EGFR
	Parathyroid hormone synthesis, secretion and action	0.0304945	2.06583	9	MAP2K1	ADCY9	RXRA	CREB3L4	MMP15	PLCB1	RHOA	EGFR	GNAI2
	Human papillomavirus infection	0.000248709	2.06444	28	ITGB1	MAML1	TRADD	LAMA4	PPP2R2A	PSEN1	RELA	EGFR	CREB3L4	DVL1	E2F1	ATP6V1H	ATP6V1E1	HRAS	APC2	MAP2K1	FZD5	ATP6AP1	FZD4	HLA-B	AXIN1	HLA-A	PPP2R5C	COL1A1	CCNA2	PPP2R2D	ITGA7	ITGA6
	Relaxin signaling pathway	0.0183278	2.05877	11	COL1A1	MAP2K1	ADCY9	CREB3L4	MMP1	NOS3	PLCB1	HRAS	RELA	EGFR	GNAI2
	Dopaminergic synapse	0.0192932	2.04305	11	CREB3L4	PPP2R2D	PPP2R2A	CALM3	CALML4	PPP2R5C	PLCB1	CAMK2G	ARNTL	GNAI2	PPP1CA
	Breast cancer	0.0182944	1.9862	12	APC2	MAP2K1	FZD5	FZD4	NCOA3	DVL1	ERBB2	AXIN1	E2F1	HRAS	EGFR	DDB2
	Oocyte meiosis	0.0334059	1.94647	10	MAP2K1	ADCY9	STAG3	CALM3	CALML4	PPP2R5C	CAMK2G	BUB1	ANAPC1	PPP1CA
	Toxoplasmosis	0.0432475	1.93786	9	ITGB1	HSPA8	IRAK1	LAMA4	ITGA6	RELA	TLR2	GNAI2	HSPA1A
	Phagosome	0.0231184	1.92086	12	ITGB1	TUBA1B	TUBB2A	ATP6AP1	ITGB2	HLA-B	TAP1	ATP6V1H	HLA-A	ATP6V1E1	ACTB	TLR2
	Tight junction	0.0234538	1.8606	13	VASP	ITGB1	PRKAB2	ROCK1	RDX	PPP2R2A	ACTB	RHOA	TUBA1B	ERBB2	PPP2R2D	ARHGEF2	CGNL1
	Human cytomegalovirus infection	0.011833	1.83833	17	MAP2K1	ROCK1	TRADD	HLA-B	TAP1	CALML4	HLA-A	RHOA	RELA	EGFR	GNAI2	ADCY9	CREB3L4	E2F1	CALM3	PLCB1	HRAS
	Pathways in cancer	0.000171077	1.83629	40	ITGB1	CTBP2	ROCK1	LAMA4	CALML4	RASGRP2	EGFR	RELA	HSP90B1	GNAI2	CASP7	RXRA	CDH1	DVL1	ERBB2	PIM1	E2F1	HRAS	CAMK2G	IL13RA1	APC2	MAP2K1	HSP90AA1	FZD5	FZD4	MMP1	NCOA3	AXIN1	AGT	RHOA	DDB2	BMP4	ADCY9	SMO	GSTA4	PPARG	ITGA6	CALM3	PLCB1	FGFR2
	cAMP signaling pathway	0.0144589	1.83629	16	MAP2K1	ROCK1	ATP2B4	CALML4	RHOA	RELA	GNAI2	PPP1CA	SLC9A1	ADCY9	CREB3L4	PLCE1	CALM3	AMH	CAMK2G	HCN2
	Focal adhesion	0.017689	1.83399	15	VASP	ITGB1	MAP2K1	ROCK1	LAMA4	ACTB	RHOA	EGFR	PPP1CA	COL1A1	ERBB2	ITGA7	ITGA6	PPP1R12B	HRAS
	RNA transport	0.0399571	1.76952	12	EEF1A1	UPF1	EIF5	XPO1	EIF1AY	SUMO3	EIF4A3	EIF4EBP2	NUP98	EIF4G3	SRRM1	EIF4G1
	Tuberculosis	0.0337785	1.76705	13	ATP6AP1	SPHK2	RIPK2	TRADD	ITGB2	CALML4	RHOA	RELA	IRAK1	ATP6V1H	CALM3	CAMK2G	TLR2
	PI3K-Akt signaling pathway	0.0210058	1.58082	23	ITGB1	MAP2K1	HSP90AA1	NOS3	LAMA4	PPP2R2A	PPP2R5C	RELA	EGFR	HSP90B1	COL1A1	EFNA1	RXRA	CREB3L4	CDC37	ERBB2	PPP2R2D	ITGA7	ITGA6	HRAS	FGFR2	PCK2	TLR2
Module	KEGG Terms	P-value	Odds Ratio	N. genes	Genes
Blue	Non-homologous end-joining	0.00765916	8.96754	3	FEN1	XRCC6	XRCC4
T2 interval	Galactose metabolism	0.00300962	5.76148	5	GALT	GAA	GALM	PGM1	PFKP
	DNA replication	0.00584537	4.83096	5	POLE4	FEN1	RNASEH2B	RFC3	LIG1
	Basal transcription factors	0.00318901	4.61323	6	GTF2B	TAF9	TBPL1	TAF4	GTF2E1	GTF2F2
	RNA polymerase	0.0173361	4.43137	4	POLR2E	POLR3F	POLR3K	POLR2L
	Propanoate metabolism	0.0193165	4.27289	4	LDHA	SUCLA2	ECHDC1	HIBCH
	Cytosolic DNA-sensing pathway	0.0163196	3.15348	6	TBK1	CHUK	POLR2E	POLR3F	POLR3K	POLR2L
	Glutathione metabolism	0.0349966	2.93342	5	GCLC	GPX3	GSTP1	MGST3	MGST1
	RNA transport	0.00101339	2.7988	14	POM121	NXT1	NUP210	NUP155	THOC3	EIF2S1	XPOT	STRAP	GEMIN6	EIF2B1	RPP14	NUPL2	EIF3C	EIF4E
	Huntington disease	0.0106299	2.17347	13	HDAC2	DCTN4	NDUFA3	COX5B	SDHA	BBC3	SOD1	COX7A2L	SIN3A	POLR2E	TBPL1	TAF4	POLR2L
	Protein processing in endoplasmic reticulum	0.0191809	2.14576	11	TRAM1	DNAJC1	HSPH1	SAR1A	SAR1B	MAN1A2	DERL3	LMAN2	MAN1A1	P4HB	EIF2S1
	mTOR signaling pathway	0.0269123	2.11356	10	CLIP1	WDR59	CHUK	CAB39	SESN2	TBC1D7	SLC38A9	BRAF	EIF4E	TNFRSF1A
	Ubiquitin mediated proteolysis	0.0349849	2.1085	9	PIAS4	CUL7	FANCL	UBE2Q2	UBE2NL	ANAPC4	UBE2A	RNF7	PML

## Sheet: Venn-T0_CExCSxCC
List of the KEGG terms in each Venn diagram areas found for modules genes positively correlated with T0 interval to three data sets (CE, CS, and CC groups). Terms related to cellular response to bacterial infection are highlighted in bold.
Diagram area	no. terms	KEGG terms
Intersection area of three sets: CE, CS, and CC groups	4	Glyoxylate and dicarboxylate metabolism
		Mismatch repair
		Pentose phosphate pathway
		Glycine, serine and threonine metabolism
Intersection area of two sets: CE and CS groups	8	Peroxisome
		One carbon pool by folate
		Bladder cancer
		Legionellosis
		Valine, leucine and isoleucine degradation
		beta-Alanine metabolism
		Cysteine and methionine metabolism
		Propanoate metabolism
CE group	8	Nucleotide excision repair
		Mitophagy
		RNA degradation
		Arginine biosynthesis
		SNARE interactions in vesicular transport
		Protein export
		Pathogenic Escherichia coli infection
		Terpenoid backbone biosynthesis
CS group	8	Porphyrin and chlorophyll metabolism
		N-Glycan biosynthesis
		Amino sugar and nucleotide sugar metabolism
		Endocrine and other factor-regulated calcium reabsorption
		Vitamin digestion and absorption
		Thyroid cancer
		Fanconi anemia pathway
		Prion diseases
CC group	16	Riboflavin metabolism
		Glycosylphosphatidylinositol (GPI)-anchor biosynthesis
		DNA replication
		Homologous recombination
		Endometrial cancer
		Small cell lung cancer
		Alanine, aspartate and glutamate metabolism
		Prostate cancer
		Chronic myeloid leukemia
		Amyotrophic lateral sclerosis (ALS)
		Tryptophan metabolism
		Colorectal cancer
		Renal cell carcinoma
		Melanoma
		Pancreatic cancer
		Measles

## Sheet: Venn-T1_CExCS
List of the KEGG terms in each Venn diagram areas found for modules genes negatively correlated with T1 interval to three data sets (CE, CS, and CC groups). Terms related to cellular response to bacterial infection are highlighted in bold.
Diagram area	no. terms	KEGG terms
Intersection area of two sets: CE and CS groups	5	Acute myeloid leukemia
		Bladder cancer
		Vitamin digestion and absorption
		Glioma
		Non-small cell lung cancer
CE group	15	N-Glycan biosynthesis
		Endometrial cancer
		Leishmaniasis
		Fat digestion and absorption
		Glycolysis / Gluconeogenesis
		Pancreatic cancer
		Fc gamma R-mediated phagocytosis
		RNA transport
		Sphingolipid signaling pathway
		Pertussis
		Chronic myeloid leukemia
		Salmonella infection
		T cell receptor signaling pathway
		Neurotrophin signaling pathway
		Notch signaling pathway
CS group	15	Parathyroid hormone synthesis, secretion and action
		Long-term potentiation
		Thyroid hormone signaling pathway
		Mismatch repair
		DNA replication
		Serotonergic synapse
		GnRH signaling pathway
		VEGF signaling pathway
		Long-term depression
		Gastric acid secretion
		ErbB signaling pathway
		Pathogenic Escherichia coli infection
		Arginine and proline metabolism
		Fc epsilon RI signaling pathway
		Vibrio cholerae infection

## Sheet: Venn-T2_CExCSxCC
List of the KEGG terms in each Venn diagram areas found for modules genes negatively correlated with T2 interval to three data sets (CE, CS, and CC groups). Terms related to cellular response to bacterial infection are highlighted in bold.
Diagram area	no. terms	KEGG terms
Intersection area of three sets: CE, CS, and CC groups	1	Peroxisome
Intersection area of two sets: CE and CS groups	1	Colorectal cancer
Intersection area of two sets: CE and CC groups	2	Glyoxylate and dicarboxylate metabolism
		RNA polymerase
Intersection area of two sets: CS and CC groups	5	Endometrial cancer
		Central carbon metabolism in cancer
		beta-Alanine metabolism
		Cysteine and methionine metabolism
		Pathogenic Escherichia coli infection
CE group	16	Hippo signaling pathway
		AMPK signaling pathway
		Phosphonate and phosphinate metabolism
		FoxO signaling pathway
		Mismatch repair
		Shigellosis
		Adherens junction
		Insulin resistance
		Cytosolic DNA-sensing pathway
		DNA replication
		p53 signaling pathway
		Ubiquinone and other terpenoid-quinone biosynthesis
		VEGF signaling pathway
		Sphingolipid metabolism
		Adipocytokine signaling pathway
		Riboflavin metabolism
CS group	13	Cell cycle
		mRNA surveillance pathway
		TGF-beta signaling pathway
		N-Glycan biosynthesis
		Nucleotide excision repair
		Prostate cancer
		Protein processing in endoplasmic reticulum
		Mineral absorption
		Valine, leucine and isoleucine degradation
		Ascorbate and aldarate metabolism
		Fluid shear stress and atherosclerosis
		Tight junction
		Ferroptosis
CC group	12	Pyruvate metabolism
		Citrate cycle (TCA cycle)
		Melanogenesis
		PPAR signaling pathway
		Bladder cancer
		Sphingolipid signaling pathway
		Legionellosis
		Thyroid cancer
		Basal cell carcinoma
		Propanoate metabolism
		Arginine and proline metabolism
		Terpenoid backbone biosynthesis

## Sheet: Venn-T2_CSxCC
List of the KEGG terms in each Venn diagram areas found for modules genes positively correlated with T2 interval to two data sets (CS and CC groups). Terms related to cellular response to bacterial infection are highlighted in bold.
Description	no. terms	KEGG terms
Intersection area of two sets: CS and CC groups	2	Cytosolic DNA-sensing pathway
		RNA polymerase
CS group	13	Parathyroid hormone synthesis, secretion and action
		Glycerolipid metabolism
		Gastric acid secretion
		C-type lectin receptor signaling pathway
		cAMP signaling pathway
		Fluid shear stress and atherosclerosis
		Oocyte meiosis
		Viral carcinogenesis
		Ovarian steroidogenesis
		Glycine, serine and threonine metabolism
		Oxytocin signaling pathway
		One carbon pool by folate
		Vibrio cholerae infection
CC group	11	mTOR signaling pathway
		Huntington disease
		Basal transcription factors
		Ubiquitin mediated proteolysis
		Glutathione metabolism
		Non-homologous end-joining
		Protein processing in endoplasmic reticulum
		Propanoate metabolism
		RNA transport
		DNA replication
		Galactose metabolism
