# Supplementary material for: Enteroinvasive <em>Escherichia Coli</em> is Inefficient to Escape from Autophagy during Caco-2 Cellular Infection
Source: Preprints.org preprint supplement (doi:10.20944/preprints202202.0321.v1), 2022-02-25
Supplement: Supplementary file 5 [file TableS1_BandoSY.xlsx]

## Sheet: Table S1
Table S1. Biological functions of the differentially expressed genes and genes expressed only in EIEC (E-EE) or S. flexneri (S-EE).
Gene	GE Profile	Description	Function	Functional categories
ycgV	DE	putative adhesion and penetration protein [b1202]	Adhesion protein	Adhesion/fimbrial or flagellar proteins
ECs2139	DE	multiple antibiotic resistance protein [ECs2139]	Antibiotic resistance protein/Drug binding	Virulence factors
marB	DE	multiple antibiotic resistance protein [Z2169]	Antibiotic resistance protein/Drug binding	Virulence factors
marR	DE	multiple antibiotic resistance protein; repressor of mar operon [b1530]	Antibiotic resistance protein/Drug binding	Virulence factors
marA	DE	multiple antibiotic resistance; transcriptional activator of defense systems [b1531]	Antibiotic resistance protein/Drug binding	Virulence factors
pbpC	DE	Penicillin-binding protein 1C [c_3042]	Antibiotic resistance protein/Drug binding	Virulence factors
ftsI	DE	septum formation; penicillin-binding protein 3; peptidoglycan synthetase [b0084]	Antibiotic resistance protein/Drug binding	Virulence factors
mukB	DE	Cell division protein mukB [c_1066]	Cell division	Other cell processes
ftsQ	DE	cell division protein; ingrowth of wall at septum [b0093]	Cell division	Other cell processes
ftsW	DE	cell division; membrane protein involved in shape determination [b0089]	Cell division	Other cell processes
mukF	DE	mukF protein [Z1269]	Cell division	Other cell processes
ACA-0244216 (letB)	DE	cytotoxic protein LetB	Cytotoxic protein	Virulence factors
ECs4519	DE	putative alpha helix protein [ECs4519]	DNA replication	Other cell processes
yicC	DE	putative alpha helix protein [Z5069]	DNA replication	Other cell processes
pgl	DE	putative isomerase [b0767]	DNA replication	Other cell processes
yidX	DE	putative replicase EC 2.7.- [b3696]	DNA replication	Other cell processes
umuC	DE	SOS mutagenesis and repair [b1184]	DNA replication	Other cell processes
umuD	DE	SOS mutagenesis; error-prone repair; processed to UmuD; forms complex with UmuC [b1183]	DNA replication	Other cell processes
fimH	DE	minor fimbrial subunit, D-mannose specific adhesin [b4320]	Fimbrial protein	Adhesion/fimbrial or flagellar proteins
fimG	DE	fimbrial morphology [b4319]	Fimbrial protein	Adhesion/fimbrial or flagellar proteins
yadL	DE	putative fimbrial protein [b0137]	Fimbrial protein	Adhesion/fimbrial or flagellar proteins
flhA	DE	flagellar biosynthesis; possible export of flagellar proteins [b1879]	Flagellar protein	Adhesion/fimbrial or flagellar proteins
flhE	DE	flagellar protein [b1878]	Flagellar protein	Adhesion/fimbrial or flagellar proteins
c_0396	DE	Insertion element IS1 1/2/3/5/6 protein insA [c_0396]	Insertion element	Other "foreign" genes
c_2511	DE	Insertion sequence ATP-binding protein [c_2511]	Insertion element	Other "foreign" genes
Z1826	DE	putative IS encoded protein [Z1826]	Insertion element	Other "foreign" genes
Z3664	DE	putative virulence protein [Z3664]	Insertion element	Other "foreign" genes
Z5816	DE	putative virulence protein [Z5816]	Insertion element	Other "foreign" genes
ECs0810	DE	NinE protein [ECs0810]	Lambda DNA	Other "foreign" genes
yibH	DE	putative membrane protein [b3597]	Membrane protein	Membrane/structural proteins
Z4403	DE	putative membrane protein [Z4403]	Membrane protein	Membrane/structural proteins
yiaC	DE	Hypothetical acetyltransferase yiaC [c_4368]; peptide-lysine-N-acetyltransferase activity (PubMed)	Metabolic process	Other cell processes
yajB	DE	Hypothetical protein yajB [c_0514]; alias acpH, acyl carrier protein phosphodiesterase (PubMed)	Metabolic process	Other cell processes
c_2485 (ybdN)	DE	Hypothetical protein ybdN [c_2485]; putative PAPS reductase/DUF3440 domain-containing protein YbdN (PubMed)	Metabolic process	Other cell processes
yiiL	DE	Hypothetical protein yiiL [c_4850]; alias rhaM, L-rhamnose mutarotase (PubMed)	Metabolic process	Other cell processes
ygjU	DE	Hypothetical symporter ygjU [c_3847]; alias sstT, serine/threonine:Na(+) symporter (PubMed)	Metabolic process	Other cell processes
c_2026 (ydgR)	DE	Hypothetical transporter ydgR [c_2026]; alias dtpA, dipeptide/tripeptide:H(+) symporter DtpA (PubMed)	Metabolic process	Other cell processes
relA	DE	(p)ppGpp synthetase I/GTP pyrophosphokinase [b2784]	Metabolic process	Other cell processes
entA	DE	2,3-dihydro-2,3-dihydroxybenzoate dehydrogenase [c_0683]	Metabolic process	Other cell processes
entB	DE	2,3-dihydro-2,3-dihydroxybenzoate synthetase, isochroismatase [b0595]	Metabolic process	Other cell processes
entE	DE	2,3-dihydroxybenzoate-AMP ligase [b0594]	Metabolic process	Other cell processes
kdgK	DE	2-dehydro-3-deoxygluconokinase [c_4337]	Metabolic process	Other cell processes
dgoA	DE	2-oxo-3-deoxygalactonate 6-phosphate aldolase and galactonate dehydratase [b3692]	Metabolic process	Other cell processes
fadA	DE	3-ketoacyl-CoA thiolase [c_4792]	Metabolic process	Other cell processes
cysH	DE	3-phosphoadenosine 5-phosphosulfate reductase [b2762]	Metabolic process	Other cell processes
metF	DE	5,10-methylenetetrahydrofolate reductase [b3941]	Metabolic process	Other cell processes
folK	DE	7,8-dihydro-6-hydroxymethylpterin-pyrophosphokinase [Z0153]	Metabolic process	Other cell processes
ECs2128	DE	altronate oxidoreductase [ECs2128]	Metabolic process	Other cell processes
ECs4889	DE	argininosuccinate lyase [ECs4889]	Metabolic process	Other cell processes
argH	DE	argininosuccinate lyase [Z5518]	Metabolic process	Other cell processes
ascG	DE	ascBF operon repressor [b2714]	Metabolic process	Other cell processes
pstB	DE	ATP-binding component of high-affinity phosphate-specific transport system [b3725]	Metabolic process	Other cell processes
srmB	DE	ATP-dependent RNA helicase srmB [c_3100]	Metabolic process	Other cell processes
cstA	DE	carbon starvation protein [b0598]	Metabolic process	Other cell processes
cdh	DE	CDP-diacylglycerol phosphotidylhydrolase [b3918]	Metabolic process	Other cell processes
pheA	DE	chorismate mutase-P and prephenate dehydratase [b2599]	Metabolic process	Other cell processes
aroC	DE	chorismate synthase [b2329]	Metabolic process	Other cell processes
adhE	DE	CoA-linked acetaldehyde dehydrogenase and iron-dependent alcohol dehydrogenase; pyruvate-formate-lyase deactivase [b1241]	Metabolic process	Other cell processes
cyoA	DE	cytochrome o ubiquinol oxidase subunit II [b0432]	Metabolic process	Other cell processes
dgoT	DE	D-galactonate transport [b3691]	Metabolic process	Other cell processes
dinD	DE	DNA-damage-inducible protein [b3645]	Metabolic process	Other cell processes
ECs0819	DE	endolysin [ECs0819]	Metabolic process	Other cell processes
ldhA	DE	fermentative D-lactate dehydrogenase, NAD-dependent [b1380]	Metabolic process	Other cell processes
fepB	DE	ferric enterobactin [b0592]	Metabolic process	Other cell processes
ECs0629	DE	ferric enterobactin [ECs0629]	Metabolic process	Other cell processes
hemH	DE	ferrochelatase: final enzyme of heme biosynthesis [b0475]	Metabolic process	Other cell processes
pflB	DE	formate acetyltransferase 1 [b0903]	Metabolic process	Other cell processes
gltD	DE	glutamate synthase, small subunit [b3213]	Metabolic process	Other cell processes
cspG	DE	homolog of Salmonella cold shock protein [b0990]	Metabolic process	Other cell processes
galF	DE	homolog of Salmonella UTP--glucose-1-P uridyltransferase, probably a UDP-gal transferase [b2042]	Metabolic process	Other cell processes
kefB	DE	K+ efflux; NEM-activable K+/H+ antiporter [b3350]	Metabolic process	Other cell processes
murC	DE	L-alanine adding enzyme, UDP-N-acetyl-muramate:alanine ligase [b0091]	Metabolic process	Other cell processes
mscL	DE	Large-conductance mechanosensitive channel [c_4051]	Metabolic process	Other cell processes
lipA	DE	lipoate synthesis, sulfur insertion? [b0628]	Metabolic process	Other cell processes
rfaC	DE	Lipopolysaccharide heptosyltransferase-1 [c_4447]	Metabolic process	Other cell processes
lldD	DE	L-lactate dehydrogenase [b3605]	Metabolic process	Other cell processes
ldcC	DE	lysine decarboxylase 2, constitutive [b0186]	Metabolic process	Other cell processes
metJ	DE	Met repressor [c_4891]	Metabolic process	Other cell processes
metK	DE	methionine adenosyltransferase 1 [b2942]	Metabolic process	Other cell processes
mgtA	DE	Mg2+ transport ATPase, P-type 1 [b4242]	Metabolic process	Other cell processes
narH	DE	nitrate reductase 1, beta subunit [b1225]	Metabolic process	Other cell processes
narJ	DE	nitrate reductase 1, delta subunit, assembly function [b1226]	Metabolic process	Other cell processes
nirD	DE	nitrite reductase [b3366]	Metabolic process	Other cell processes
torD	DE	part of trimethylamine-N-oxide oxidoreductase [Z1416]	Metabolic process	Other cell processes
hypC	DE	pleiotrophic effects on 3 hydrogenase isozymes [b2728]	Metabolic process	Other cell processes
phoB	DE	positive response regulator for pho regulon, sensor is PhoR [b0399]	Metabolic process	Other cell processes
fdhE	DE	Protein fdhE [c_4841]	Metabolic process	Other cell processes
mngA	DE	protein modification enzyme, induction of ompC [b0731]	Metabolic process	Other cell processes
c_2059 (ydhR)	DE	Protein ydhR precursor [c_2059]	Metabolic process	Other cell processes
manX	DE	PTS enzyme IIAB, mannose-specific [b1817]	Metabolic process	Other cell processes
ascF	DE	PTS system enzyme II ABC [b2715]	Metabolic process	Other cell processes
nadA	DE	Quinolinate synthetase A [c_0825]	Metabolic process	Other cell processes
ECs0778	DE	quinolinate synthetase A protein [ECs0778]	Metabolic process	Other cell processes
nadB	DE	quinolinate synthetase, B protein [b2574]	Metabolic process	Other cell processes
rhaD	DE	rhamnulose-phosphate aldolase [Z5446]	Metabolic process	Other cell processes
sitA	DE	SitA protein [c_1600]	Metabolic process	Other cell processes
sitB	DE	SitB protein [c_1599]	Metabolic process	Other cell processes
sitD	DE	SitD protein [c_1597]	Metabolic process	Other cell processes
cysI	DE	sulfite reductase, alpha subunit [b2763]	Metabolic process	Other cell processes
ftsP	DE	suppressor of ftsI [b3017]	Metabolic process	Other cell processes
sulA	DE	suppressor of lon; inhibits cell division and ftsZ ring formation [b0958]	Metabolic process	Other cell processes
gatY	DE	Tagatose-bisphosphate aldolase gatY [c_2621]	Metabolic process	Other cell processes
gntK	DE	Thermoresistant gluconokinase [c_4225]	Metabolic process	Other cell processes
dsbG	DE	Thiol:disulfide interchange protein dsbG precursor [c_0692]	Metabolic process	Other cell processes
thrC	DE	threonine synthase [b0004]	Metabolic process	Other cell processes
tam	DE	Trans-aconitate 2-methyltransferase [c_1942]	Metabolic process	Other cell processes
c_2388	DE	Transthyretin-like protein precursor [c_2388]	Metabolic process	Other cell processes
treA	DE	trehalase, periplasmic [b1197]	Metabolic process	Other cell processes
ugd	DE	UDP-glucose 6-dehydrogenase [b2028]	Metabolic process	Other cell processes
murB	DE	UDP-N-acetylenolpyruvoylglucosamine reductase [c_4931]	Metabolic process	Other cell processes
exbD	DE	uptake of enterochelin; tonB-dependent uptake of B colicins [b3005]	Metabolic process	Other cell processes
dkgB	DE	putative aldose reductase [b0207]	Metabolic process	Other cell processes
yfbQ	DE	putative aminotransferase [b2290]	Metabolic process	Other cell processes
adiY	DE	putative ARAC-type regulatory protein [b4116]	Metabolic process	Other cell processes
sufC	DE	putative ATP-binding component of a transport system [b1682]	Metabolic process	Other cell processes
ypjA	DE	putative ATP-binding component of a transport system [b2647]	Metabolic process	Other cell processes
yhbU	DE	putative collagenase [b3158]	Metabolic process	Other cell processes
yiaK	DE	putative dehydrogenase [b3575]	Metabolic process	Other cell processes
yjjV	DE	Putative deoxyribonuclease yjjV [c_5461]	Metabolic process	Other cell processes
ECs2184	DE	putative endopeptidase [ECs2184]	Metabolic process	Other cell processes
idi	DE	putative enzyme [b2889]	Metabolic process	Other cell processes
ECs2517	DE	putative enzyme [ECs2517]	Metabolic process	Other cell processes
ybjP	DE	putative enzyme [Z1095]	Metabolic process	Other cell processes
Z2851	DE	putative enzyme [Z2851]	Metabolic process	Other cell processes
ulaF	DE	putative epimerase/aldolase [b4198]	Metabolic process	Other cell processes
ECs1697	DE	putative ferric enterobactin transport ATP-binding protein [ECs1697]	Metabolic process	Other cell processes
acpH	DE	putative glycoprotein [b0404]	Metabolic process	Other cell processes
L7004	DE	putative hemolysin expression modulating protein [L7004]	Metabolic process	Other cell processes
sgaU	DE	putative hexulose-6-phosphate isomerase [Z5806]	Metabolic process	Other cell processes
yihV	DE	putative kinase [b3883]	Metabolic process	Other cell processes
ybjS	DE	putative nucleotide di-P-sugar epimerase or dehydratase [b0868]	Metabolic process	Other cell processes
yphC	DE	putative oxidoreductase [b2545]	Metabolic process	Other cell processes
b2931	DE	putative oxidoreductase [b2931]	Metabolic process	Other cell processes
yqhD	DE	putative oxidoreductase [b3011]	Metabolic process	Other cell processes
Z3817	DE	putative oxidoreductase [Z3817]	Metabolic process	Other cell processes
Z3818	DE	putative oxidoreductase [Z3818]	Metabolic process	Other cell processes
ECs0794	DE	putative phosphatase [ECs0794]	Metabolic process	Other cell processes
ybhA	DE	putative phosphatase [Z0936]	Metabolic process	Other cell processes
etp	DE	putative phosphatase [Z1399]	Metabolic process	Other cell processes
c_2922 (ypdD)	DE	Putative phosphoenolpyruvate-protein phosphotransferase ypdD [c_2922]	Metabolic process	Other cell processes
ECs3263	DE	putative PTS system enzyme IIA component [ECs3263]	Metabolic process	Other cell processes
Z3648	DE	putative PTS system enzyme IIA component, enzyme [Z3648]	Metabolic process	Other cell processes
fryA	DE	putative PTS system enzyme IIA component, enzyme I [b2383]	Metabolic process	Other cell processes
yjfC	DE	putative synthetase/amidase [b4186]	Metabolic process	Other cell processes
pldA	DE	outer membrane phospholipase A [b3821]	Outer membrane	Membrane/structural proteins
ompC	DE	outer membrane protein 1b [Z3473]	Outer membrane	Membrane/structural proteins
ECs3104	DE	outer membrane protein C OmpC [ECs3104]	Outer membrane	Membrane/structural proteins
ompX	DE	outer membrane protein X [b0814]	Outer membrane	Membrane/structural proteins
slyB	DE	putative outer membrane protein [b1641]	Outer membrane	Membrane/structural proteins
ccdA	DE	pINV gene	pINV gene	pINV-derived genes
pWR501_0277_S	DE	pINV gene	pINV gene	pINV-derived genes
insB_pWR501_0226	DE	pINV gene	pINV gene	pINV-derived genes
ipaC	DE	pINV gene	pINV gene	pINV-derived genes
IpaH4_5	DE	pINV gene	pINV gene	pINV-derived genes
ipgH	DE	pINV gene	pINV gene	pINV-derived genes
mvpA	DE	pINV gene	pINV gene	pINV-derived genes
pWR501_0006_S0006	DE	pINV gene	pINV gene	pINV-derived genes
pWR501_0007_S0007	DE	pINV gene	pINV gene	pINV-derived genes
pWR501_0025_S0025	DE	pINV gene	pINV gene	pINV-derived genes
pWR501_0031_S0031_	DE	pINV gene	pINV gene	pINV-derived genes
pWR501_0034_S0034_	DE	pINV gene	pINV gene	pINV-derived genes
pWR501_0035_S0035	DE	pINV gene	pINV gene	pINV-derived genes
pWR501_0036_S0036	DE	pINV gene	pINV gene	pINV-derived genes
pWR501_0037_S0037	DE	pINV gene	pINV gene	pINV-derived genes
pWR501_0038_S0038	DE	pINV gene	pINV gene	pINV-derived genes
pWR501_0046_S0046_	DE	pINV gene	pINV gene	pINV-derived genes
pWR501_0049_S0049_	DE	pINV gene	pINV gene	pINV-derived genes
pWR501_0050_S0050	DE	pINV gene	pINV gene	pINV-derived genes
pWR501_0066_S0066_	DE	pINV gene	pINV gene	pINV-derived genes
pWR501_0081_S0081_	DE	pINV gene	pINV gene	pINV-derived genes
pWR501_0082_S0082	DE	pINV gene	pINV gene	pINV-derived genes
pWR501_0083_S0083	DE	pINV gene	pINV gene	pINV-derived genes
pWR501_0088_S0088	DE	pINV gene	pINV gene	pINV-derived genes
pWR501_0117_S0117_	DE	pINV gene	pINV gene	pINV-derived genes
pWR501_0118_S0118_	DE	pINV gene	pINV gene	pINV-derived genes
pWR501_0119_S0119_	DE	pINV gene	pINV gene	pINV-derived genes
pWR501_0120_S0120_	DE	pINV gene	pINV gene	pINV-derived genes
pWR501_0121_S0121	DE	pINV gene	pINV gene	pINV-derived genes
pWR501_0122_S0122	DE	pINV gene	pINV gene	pINV-derived genes
pWR501_0128_S0128_	DE	pINV gene	pINV gene	pINV-derived genes
pWR501_0200_S020	DE	pINV gene	pINV gene	pINV-derived genes
pWR501_0219_S021	DE	pINV gene	pINV gene	pINV-derived genes
pWR501_0227_S0227	DE	pINV gene	pINV gene	pINV-derived genes
pWR501_0230_S0230	DE	pINV gene	pINV gene	pINV-derived genes
pWR501_0231_S0231	DE	pINV gene	pINV gene	pINV-derived genes
pWR501_0277_S	DE	pINV gene	pINV gene	pINV-derived genes
sopA	DE	pINV gene	pINV gene	pINV-derived genes
spa24	DE	pINV gene	pINV gene	pINV-derived genes
spa29	DE	pINV gene	pINV gene	pINV-derived genes
spa40	DE	pINV gene	pINV gene	pINV-derived genes
spa-orf10	DE	pINV gene	pINV gene	pINV-derived genes
tnpE	DE	pINV gene	pINV gene	pINV-derived genes
tnpF	DE	pINV gene	pINV gene	pINV-derived genes
tnpG	DE	pINV gene	pINV gene	pINV-derived genes
tnpG	DE	pINV gene	pINV gene	pINV-derived genes
tnpG	DE	pINV gene	pINV gene	pINV-derived genes
traI	DE	pINV gene	pINV gene	pINV-derived genes
traI	DE	pINV gene	pINV gene	pINV-derived genes
virA	DE	pINV gene	pINV gene	pINV-derived genes
yihA	DE	pINV gene	pINV gene	pINV-derived genes
c_1572	DE	Putative capsid assembly protein of prophage [c_1572]	Prophage gene	Other "foreign" genes
c_3167	DE	Putative DNA packaging protein of prophage [c_3167]	Prophage gene	Other "foreign" genes
c_1445	DE	Putative DNA packaging protein of prophage terminase [c_1445]	Prophage gene	Other "foreign" genes
Z1352	DE	putative endolysin of cryptic prophage CP-933M [Z1352]	Prophage gene	Other "foreign" genes
ECs3000	DE	putative host-nuclease inhibitor protein Gam [ECs3000]	Prophage gene	Other "foreign" genes
Z3365	DE	putative host-nuclease inhibitor protein Gam of prophage [Z3365]	Prophage gene	Other "foreign" genes
Z0960	DE	putative lysozyme protein R of prophage CP-933K [Z0960]	Prophage gene	Other "foreign" genes
Z1376	DE	putative tail component encoded by cryptic prophage [Z1376]	Prophage gene	Other "foreign" genes
c_1587	DE	Putative tail component of prophage [c_1587]	Prophage gene	Other "foreign" genes
c_1588	DE	Putative tail component of prophage [c_1588]	Prophage gene	Other "foreign" genes
c_3155	DE	Putative tail component of prophage [c_3155]	Prophage gene	Other "foreign" genes
Z0970	DE	putative tail component of prophage CP-933K [Z0970]	Prophage gene	Other "foreign" genes
Z0971	DE	putative tail component of prophage CP-933K [Z0971]	Prophage gene	Other "foreign" genes
Z0974	DE	putative tail component of prophage CP-933K [Z0974]	Prophage gene	Other "foreign" genes
Z0978	DE	putative tail component of prophage CP-933K [Z0978]	Prophage gene	Other "foreign" genes
Z3082	DE	putative tail fiber component L of prophage [Z3082]	Prophage gene	Other "foreign" genes
Z2397	DE	unknown protein encoded within prophage CP-933R [Z2397]	Prophage gene	Other "foreign" genes
Z3124	DE	unknown protein encoded within prophage CP-933U [Z3124]	Prophage gene	Other "foreign" genes
cysP	DE	thiosulfate binding protein [b2425]	Protein binding	Other cell processes
ECs3296	DE	thiosulfate binding protein [ECs3296]	Protein binding	Other cell processes
syd	DE	interacts with secY [b2793]	Protein binding	Other cell processes
murQ	DE	putative regulator [b2428]	Regulator protein	Regulator protein
yhhX	DE	putative regulator [b3440]	Regulator protein	Regulator protein
yibD	DE	putative regulator [b3615]	Regulator protein	Regulator protein
evgS	DE	putative sensor for regulator EvgA [Z3632]	Regulator protein	Regulator protein
rutR	DE	putative tet operon regulator [b1013]	Regulator protein	Regulator protein
ycjZ	DE	putative transcriptional regulator LYSR-type [b1328]	Regulator protein	Regulator protein
b3695	DE	regulator protein for dgo operon [b3695]	Regulator protein	Regulator protein
ECs4266	DE	repressor of the glp operon [ECs4266]	Regulator protein	Regulator protein
yfcA	DE	putative structural protein [b2327]	Strutural protein	Other cell processes
ECs0840	DE	putative tail assembly protein [ECs0840]	Tail protein	Other "foreign" genes
ECs0834	DE	putative major tail protein [ECs0834]	Tail protein	Other "foreign" genes
ECs0832	DE	putative minor tail protein [ECs0832]	Tail protein	Other "foreign" genes
ECs0833	DE	putative minor tail protein [ECs0833]	Tail protein	Other "foreign" genes
ECs0836	DE	putative minor tail protein [ECs0836]	Tail protein	Other "foreign" genes
ECs0838	DE	putative minor tail protein [ECs0838]	Tail protein	Other "foreign" genes
cspC	DE	cold shock protein [b1823]	Transcription	Other cell processes
cspE	DE	Cold shock-like protein cspE [c_0714]	Transcription	Other cell processes
c_0460 (lacI)	DE	LacI protein [c_0460]	Transcription	Other cell processes
ECs1645	DE	minor tail protein [ECs1645]	Transcription	Other cell processes
pspF	DE	psp operon transcriptional activator [b1303]	Transcription	Other cell processes
rpiA	DE	ribosephosphate isomerase, constitutive [b2914]	Transcription	Other cell processes
c_3116	DE	Ribosomal large subunit pseudouridine synthase D [c_3116]	Transcription	Other cell processes
rnb	DE	RNase II, mRNA degradation [b1286]	Transcription	Other cell processes
cbl	DE	transcriptional regulator cys regulon; accessory regulatory circuit affecting cysM [b1987]	Transcription	Other cell processes
pdhR	DE	transcriptional regulator for pyruvate dehydrogenase complex [b0113]	Transcription	Other cell processes
uxuR	DE	Uxu operon transcriptional regulator [c_5404]	Transcription	Other cell processes
yhgE	DE	Hypothetical protein yhgE [c_4173]; putative transport protein YhgE (PubMed)	Transport	Other cell processes
pstA	DE	high-affinity phosphate-specific transport system [b3726]	Transport	Other cell processes
pstC	DE	high-affinity phosphate-specific transport system, cytoplasmic membrane component [b3727]	Transport	Other cell processes
pstS	DE	high-affinity phosphate-specific transport system; periplasmic phosphate-binding protein [b3728]	Transport	Other cell processes
secA	DE	preprotein translocase; secretion protein [b0098]	Transport	Other cell processes
puuP	DE	putative amino acid/amine transport protein [b1296]	Transport	Other cell processes
yeeF	DE	putative amino acid/amine transport protein [b2014]	Transport	Other cell processes
ECs0539	DE	putative amino acid/amine transport protein [ECs0539]	Transport	Other cell processes
ycaM	DE	putative transport [b0899]	Transport	Other cell processes
ECs4244	DE	putative transport [ECs4244]	Transport	Other cell processes
yhiD	DE	putative transport ATPase [b3508]	Transport	Other cell processes
mppA	DE	putative transport periplasmic protein [b1329]	Transport	Other cell processes
tppB	DE	putative transport protein [b1634]	Transport	Other cell processes
yejB	DE	putative transport system permease protein [b2178]	Transport	Other cell processes
insK	DE	IS150 putative transposase [b3558]	Transposase	Other "foreign" genes
Z2562	DE	putative transposase [Z2562]	Transposase	Other "foreign" genes
ECs5182	DE	putative transposase TnpA of insertion sequence IS609 [ECs5182]	Transposase	Other "foreign" genes
ECs5183	DE	putative transposase TnpB of insertion sequence IS609 [ECs5183]	Transposase	Other "foreign" genes
c_2503	DE	Transposase [c_2503]	Transposase	Other "foreign" genes
c_1225	DE	Transposase insE for insertion sequence IS3A/B/C/D/E/fA/fB [c_1225]	Transposase	Other "foreign" genes
c_5341	DE	Mg [c_5341]	Unknown	Unknown/Pseudogene
c_2670	DE	Putative conserved protein [c_2670]	Unknown	Unknown/Pseudogene
ygaC	DE	Hypothetical protein ygaC [c_3222]	Unknown	Unknown/Pseudogene
yjfM	DE	Hypothetical protein yjfM [c_5272]; DUF1190 domain-containing protein YjfM (Pubmed)	Unknown	Unknown/Pseudogene
ybdD	DE	conserved protein [b4512]	Unknown	Unknown/Pseudogene
ymdF	DE	conserved protein [b4518]	Unknown	Unknown/Pseudogene
c_1870 (ortT)	S-EE	Hypothetical protein ydcX [c_1870]; alias ortT, orphan toxin OrtT (PubMed)	Autolysis	Virulence factors
Z2046	S-EE	putative regulator of cell division encoded by [Z2046]	Cell division	Other cell processes
ECs1189	S-EE	replication protein O [ECs1189]	Cell division	Other cell processes
ydaV	S-EE	putative DNA replication factor [b1360]	DNA replication	Other cell processes
ECs1945	S-EE	putative DNA replication factor [ECs1945]	DNA replication	Other cell processes
Z2396	S-EE	putative DNA replication factor encoded by prophage [Z2396]	DNA replication	Other cell processes
Z6069	S-EE	putative DNA replication factor encoded within cryptic [Z6069]	DNA replication	Other cell processes
ECs2275	S-EE	putative DNA replication protein [ECs2275]	DNA replication	Other cell processes
ECs1759	S-EE	putative exonuclease [ECs1759]	DNA replication	Other cell processes
exoO	S-EE	putative exonuclease VIII, ds DNA exonuclease, 5 [Z2037]	DNA replication	Other cell processes
ECs1597	S-EE	putative terminase small subunit [ECs1597]	DNA replication	Other cell processes
tehA	S-EE	tellurite resistance [b1429]	Drug resistance	Virulence factors
fimF	S-EE	FimF protein precursor [c_5397]; type 1 fimbriae minor subunit FimF (Pubmed)	Fimbrial protein	Adhesion/fimbrial or flagellar proteins
ECs5273	S-EE	major type 1 subunit fimbrin [ECs5273]	Fimbrial protein	Adhesion/fimbrial or flagellar proteins
fimB	S-EE	recombinase involved in phase variation; regulator for fimA [b4312]	Fimbrial protein/regulator	Adhesion/fimbrial or flagellar proteins
flhE	S-EE	Flagellar protein flhE precursor [c_2292]	Flagellar protein	Adhesion/fimbrial or flagellar proteins
insB	S-EE	Insertion element IS1 1/5/6 protein insB [c_4504]	Insertion element	Other "foreign" genes
c_4507	S-EE	Transposase insF for insertion sequence IS3A/B/C/D/E/fA [c_4507]	Insertion element	Other "foreign" genes
c_1542	S-EE	Lambda ant-restriction protein [c_1542]	Lambda DNA	Other "foreign" genes
ECs0811	S-EE	NinF protein [ECs0811]	Lambda DNA	Other "foreign" genes
waaD	S-EE	putative LPS biosynthesis enzyme [Z5050]	LPS	Membrane/structural proteins
waaJ	S-EE	putative LPS biosynthesis enzyme [Z5051]	LPS	Membrane/structural proteins
yfcA	S-EE	Hypothetical protein yfcA [c_2873]; membrane protein (PubMed)	Membrane protein	Membrane/structural proteins
ynbA	S-EE	Hypothetical protein ynbA [c_1834]; putative inner membrane protein (PubMed)	Membrane protein	Membrane/structural proteins
rimL	S-EE	acetylation of N-terminal serine of 30S ribosomal subunit protein L7; acetyl transferase [b1427]	Metabolic process	Other cell processes
azoR	S-EE	acyl carrier protein phosphodiesterase [b1412]	Metabolic process	Other cell processes
aldA	S-EE	aldehyde dehydrogenase, NAD-linked [b1415]	Metabolic process	Other cell processes
aslA	S-EE	arylsulfatase [b3801]	Metabolic process	Other cell processes
betA	S-EE	Choline dehydrogenase [c_0431]	Metabolic process	Other cell processes
betA	S-EE	choline dehydrogenase, a flavoprotein [b0311]	Metabolic process	Other cell processes
betA	S-EE	choline dehydrogenase, a flavoprotein [Z0398]	Metabolic process	Other cell processes
c_3523	S-EE	Conserved hypothetical protein [c_3523]	Metabolic process	Other cell processes
cybB	S-EE	cytochrome b [b1418]	Metabolic process	Other cell processes
rfbB	S-EE	dTDP-glucose 4,6 dehydratase [b2041]	Metabolic process	Other cell processes
emrE	S-EE	EmrE protein [c_2352]	Metabolic process	Other cell processes
recE	S-EE	Exodeoxyribonuclease VIII [c_1402]	Metabolic process	Other cell processes
sbcB	S-EE	exonuclease I, 3 --> 5 specific; deoxyribophosphodiesterase [b2011]	Metabolic process	Other cell processes
fdnI	S-EE	formate dehydrogenase-N, nitrate-inducible, cytochrome B556 [b1476]	Metabolic process	Other cell processes
fdnH	S-EE	formate dehydrogenase-N, nitrate-inducible, iron-sulfur beta subunit [b1475]	Metabolic process	Other cell processes
hrpA	S-EE	helicase, ATP-dependent [b1413]	Metabolic process	Other cell processes
ECs4499	S-EE	heptosyl transferase I [ECs4499]	Metabolic process	Other cell processes
ECs4356	S-EE	HicB-like protein [ECs4356]	Metabolic process	Other cell processes
iucA	S-EE	IucA protein [c_3627]; aerobactin siderophore biosynthesis protein IucA (PubMed)	Metabolic process	Other cell processes
iucB	S-EE	IucB protein [c_3626]; aerobactin siderophore biosynthesis protein IucB (PubMed)	Metabolic process	Other cell processes
iucC	S-EE	IucC protein [c_3625]; aerobactin synthase IucC (PubMed)	Metabolic process	Other cell processes
ECs4500	S-EE	lipid A-core:surface polymer ligase [ECs4500]	Metabolic process	Other cell processes
ECs4503	S-EE	lipopolysaccharide core biosynthesis protein WaaY [ECs4503]	Metabolic process	Other cell processes
ynbA	S-EE	probable enzyme [b1408]	Metabolic process	Other cell processes
ybcL	S-EE	Protein ybcL precursor [c_2350]	Metabolic process	Other cell processes
ECs3802	S-EE	putative ABC transporter ATP-binding subunit [ECs3802]	Metabolic process	Other cell processes
ydcW	S-EE	putative aldehyde dehydrogenase [b1444]	Metabolic process	Other cell processes
yidL	S-EE	putative ARAC-type regulatory protein [b3680]	Metabolic process	Other cell processes
ddpF	S-EE	putative ATP-binding component of a transport system [b1483]	Metabolic process	Other cell processes
c_3509	S-EE	Putative ATP-binding protein of ABC transport system [c_3509]	Metabolic process	Other cell processes
ydcP	S-EE	putative collagenase [b1435]	Metabolic process	Other cell processes
c_1874	S-EE	Putative conserved protein [c_1874]	Metabolic process	Other cell processes
ECs2464	S-EE	putative cytochrome oxidase [ECs2464]	Metabolic process	Other cell processes
c_0330	S-EE	Putative deoxyribose operon repressor [c_0330]	Metabolic process	Other cell processes
ynfE	S-EE	Putative dimethyl sulfoxide reductase chain ynfE precursor [c_1977]	Metabolic process	Other cell processes
ECs3242	S-EE	putative fructokinase [ECs3242]	Metabolic process	Other cell processes
ECs1100	S-EE	putative holin protein [ECs1100]	Metabolic process	Other cell processes
ECs2188	S-EE	putative holin protein [ECs2188]	Metabolic process	Other cell processes
Z1794	S-EE	putative holin protein [Z1794]	Metabolic process	Other cell processes
frcK	S-EE	putative kinase [ECs3804]	Metabolic process	Other cell processes
ynfE	S-EE	putative oxidoreductase, major subunit [b1587]	Metabolic process	Other cell processes
ynbB	S-EE	putative phosphatidate cytidiltransferase [b1409]	Metabolic process	Other cell processes
c_4985	S-EE	Putative sorbose PTS component [c_4985]	Metabolic process	Other cell processes
Z5616	S-EE	putative sorbose PTS component [Z5616]	Metabolic process	Other cell processes
yidJ	S-EE	putative sulfatase [b3678]	Metabolic process	Other cell processes
yidJ	S-EE	putative sulfatase [Z5173]	Metabolic process	Other cell processes
ECs4502	S-EE	putative UDP-glucose: [ECs4502]	Metabolic process	Other cell processes
ECs5001	S-EE	sorbose-permease PTS system IIB component [ECs5001]	Metabolic process	Other cell processes
ECs3243	S-EE	sucrose-6 phosphate hydrolase [ECs3243]	Metabolic process	Other cell processes
ECs1693	S-EE	putative TonB dependent outer membrane receptor [ECs1693]	Outer membrane	Membrane/structural proteins
pWR501_0205_S020	S-EE	pINV gene	pINV	pINV-derived genes
pWR501_0215_S021	S-EE	pINV gene	pINV	pINV-derived genes
Z2101	S-EE	putative endonuclease encoded within prophage CP-933O [Z2101]	Prophage gene	Other "foreign" genes
Z2057	S-EE	putative endonuclease of prophage CP-933O [Z2057]	Prophage gene	Other "foreign" genes
exoP	S-EE	putative exodeoxyribonuclease encoded by cryptic prophage CP-933P [Z6080]	Prophage gene	Other "foreign" genes
Z2122	S-EE	putative holin protein of prophage CP-933O [Z2122]	Prophage gene	Other "foreign" genes
Z3106	S-EE	putative holin protein of prophage CP-933U [Z3106]	Prophage gene	Other "foreign" genes
intL	S-EE	putative integrase for prophage 933L and the [Z5087]	Prophage gene	Other "foreign" genes
intC	S-EE	Putative prophage integrase [c_4491]	Prophage gene	Other "foreign" genes
Z1380	S-EE	putative tail component encoded by cryptic prophage [Z1380]	Prophage gene	Other "foreign" genes
Z6062	S-EE	unknown protein encoded by cryptic prophage CP-933P [Z6062]	Prophage gene	Other "foreign" genes
c_1505	S-EE	Unknown protein encoded by prophage [c_1505]	Prophage gene	Other "foreign" genes
Z2382	S-EE	unknown protein encoded within prophage CP-933R [Z2382]	Prophage gene	Other "foreign" genes
ECs1765	S-EE	putative regulatory protein [ECs1765]	Regulator protein	Regulator protein
ECs1766	S-EE	putative regulatory protein [ECs1766]	Regulator protein	Regulator protein
Z5000	S-EE	putative regulatory protein [Z5000]	Regulator protein	Regulator protein
Z2045	S-EE	similar to DicA, regulator of DicB encoded [Z2045]	Regulator protein	Regulator protein
ECs5004	S-EE	sor-operon regulator [ECs5004]	Regulator protein	Regulator protein
ECs3244	S-EE	sucrose operon repressor [ECs3244]	Regulator protein	Regulator protein
Z3626	S-EE	sucrose specific transcriptional regulator [Z3626]	Regulator protein	Regulator protein
yddM	S-EE	Hypothetical protein yddM [c_1909]; putative DNA-binding transcriptional regulator YddM (PubMed)	Transcription	Other cell processes
c_3273 (higA)	S-EE	Hypothetical protein ygjM [c_3273]; alias higA, antitoxin/DNA-binding transcriptional repressor HigA (PubMed)	Transcription	Other cell processes
ydcI	S-EE	putative transcriptional regulator LYSR-type [b1422]	Transcription	Other cell processes
Z5619	S-EE	putative transcriptional regulator of sorbose uptake and [Z5619]	Transcription	Other cell processes
chaC	S-EE	cation transport regulator [b1218]	Transport	Other cell processes
betT	S-EE	high-affinity choline transport [b0314]	Transport	Other cell processes
ECs0360	S-EE	high-affinity choline transport [ECs0360]	Transport	Other cell processes
betT	S-EE	High-affinity choline transport protein [c_0434]	Transport	Other cell processes
yjiZ	S-EE	Hypothetical transport protein yjjL [c_4921]; alias lgoT, galactonate:H(+) symporter (PubMed)	Transport	Other cell processes
ddpC	S-EE	putative transport protein [b1485]	Transport	Other cell processes
ECs0346	S-EE	putative transporter [ECs0346]	Transport	Other cell processes
shiF	S-EE	shiF protein [c_3628]; transport protein (PubMed)	Unknown	Unknown
dicB	E-EE	inhibition of cell division [b1575]	Cell division	Other cell processes
chpA	E-EE	probable growth inhibitor, PemK-like, autoregulated [b2782]	Cell division	Other cell processes
ACA-0244256	E-EE	Replication protein []	Cell division	Other cell processes
fdrA	E-EE	involved in protein transport; multicopy suppressor of dominant negative ftsH mutants [b0518]	Cell division	Other cell processes
sbmC	E-EE	SbmC protein [b2009]; DNA gyrase inhibitor (PubMed)	DNA replication	Other cell processes
chpR	E-EE	suppressor of inhibitory function of ChpA, PemI-like, autoregulated [b2783]	DNA replication	Other cell processes
ECs0303	E-EE	putative DNA primase [ECs0303]	DNA replication	Other cell processes
yeeS	E-EE	putative DNA repair protein, RADC family [b2002]	DNA replication	Other cell processes
ECs2622	E-EE	putative DNA-binding protein [ECs2622]	DNA replication	Other cell processes
acrF	E-EE	integral transmembrane protein; acridine resistance [b3266]	Drug resistance	Virulence factors
yadK	E-EE	putative fimbrial protein [b0136]	Fimbrial protein	Adhesion/fimbrial or flagellar proteins
yadN	E-EE	putative fimbrial-like protein [b0141]	Fimbrial protein	Adhesion/fimbrial or flagellar proteins
ycbQ	E-EE	putative fimbrial-like protein [b0938]	Fimbrial protein	Adhesion/fimbrial or flagellar proteins
b0374	E-EE	putative flagellin structural protein [b0374]	Flagellar protein	Adhesion/fimbrial or flagellar proteins
Z2428	E-EE	partial putative pump protein disrupted by IS629 [Z2428]	Insertion element	Other "foreign" genes
rlpB	E-EE	a minor lipoprotein [Z0788]	Lipoprotein	Other cell processes
Z0250	E-EE	putative macrophage toxin [Z0250]	Macrophage toxin	Virulence factors
ycfZ	E-EE	homolog of virulence factor [b1121]; putative inner membrane protein (PubMed)	Membrane protein	Membrane/structural proteins
ECs2619	E-EE	putative membrane protein [ECs2619]	Membrane protein	Membrane/structural proteins
acrE	E-EE	transmembrane protein affects septum formation and cell membrane permeability [b3265]	Membrane protein	Membrane/structural proteins
gspO	E-EE	leader peptidase, integral membrane protein [b3335]	Membrane protein	Membrane/structural proteins
yjiN	E-EE	Hypothetical protein yjiN [c_5419]; DUF445 domain-containing protein YjiN (PubMed)	Membrane protein	Membrane/structural proteins
mhpB	E-EE	2,3-dihydroxyphenylpropionate 1,2-dioxygenase [b0348]	Metabolic process	Other cell processes
mhpC	E-EE	2-hydroxy-6-ketonona-2,4-dienedioic acid hydrolase [b0349]	Metabolic process	Other cell processes
mhpD	E-EE	2-keto-4-pentenoate hydratase [b0350]	Metabolic process	Other cell processes
mhpA	E-EE	putative 3-(3-hydroxyphenyl)propanoate/3-hydroxycinnamate hydroxylase [b0347]	Metabolic process	Other cell processes
atoB	E-EE	acetyl-CoA acetyltransferase [b2224]	Metabolic process	Other cell processes
atoD	E-EE	acetyl-CoA:acetoacetyl-CoA transferase alpha subunit [b2221]	Metabolic process	Other cell processes
atoA	E-EE	acetyl-CoA:acetoacetyl-CoA transferase beta subunit [b2222]	Metabolic process	Other cell processes
frmA	E-EE	alcohol dehydrogenase class III; formaldehyde dehydrogenase, glutathione-dependent [b0356]	Metabolic process	Other cell processes
ECs0573	E-EE	allantoinase [ECs0573]	Metabolic process	Other cell processes
phnN	E-EE	ATP-binding component of phosphonate transport [b4094]	Metabolic process	Other cell processes
srmB	E-EE	ATP-dependent RNA helicase srmB [c_3100]	Metabolic process	Other cell processes
lacZ	E-EE	beta-D-galactosidase [b0344]	Metabolic process	Other cell processes
lacZ	E-EE	Beta-galactosidase [c_0459]	Metabolic process	Other cell processes
tynA	E-EE	copper amine oxidase [b1386]	Metabolic process	Other cell processes
yhaG	E-EE	D-galactarate dehydratase [c_3883]	Metabolic process	Other cell processes
dsdC	E-EE	D-serine dehydratase [b2364]	Metabolic process	Other cell processes
eutC	E-EE	ethanolamine ammonia-lyase, light chain [Z3705]	Metabolic process	Other cell processes
eutD	E-EE	ethanolamine utilization; homolog of Salmonella acetyl/butyryl P transferase [b2458]	Metabolic process	Other cell processes
eutG	E-EE	ethanolamine utilization; homolog of Salmonella enzyme, similar to iron-containing alcohol dehydrogenase [b2453]	Metabolic process	Other cell processes
eutE	E-EE	ethanolamine utilization; similar to acetaldehyde dehydrogenase [b2455]	Metabolic process	Other cell processes
ybbZ	E-EE	Glycerate kinase 1 [c_0628]	Metabolic process	Other cell processes
yjaZ	E-EE	heat shock protein htrC [b3989]	Metabolic process	Other cell processes
ECs4912	E-EE	heat shock protein htrC [ECs4912]	Metabolic process	Other cell processes
ydgJ	E-EE	Hypothetical oxidoreductase ydgJ [c_2016]	Metabolic process	Other cell processes
phnP	E-EE	phosphonate metabolism [b4092]	Metabolic process	Other cell processes
agaC	E-EE	PTS system N-acetylgalactosamine-specific IIC component 1 [b3139]	Metabolic process	Other cell processes
cmtB	E-EE	PTS system, mannitol-specific enzyme II component, cryptic [b2934]	Metabolic process	Other cell processes
putA	E-EE	PutA protein [c_1151]	Metabolic process	Other cell processes
c_5300	E-EE	Putative acetyl-CoA:acetoacetyl-CoA transferase [c_5300]	Metabolic process	Other cell processes
yeaN	E-EE	putative amino acid/amine transport protein [b1791]	Metabolic process	Other cell processes
ECs2500	E-EE	putative amino acid/amine transport protein [ECs2500]	Metabolic process	Other cell processes
yeaN	E-EE	putative amino acid/amine transport protein [Z2833]	Metabolic process	Other cell processes
c_2419	E-EE	Putative anthranilate synthase [c_2419]	Metabolic process	Other cell processes
ydiP	E-EE	putative ARAC-type regulatory protein [b1696]	Metabolic process	Other cell processes
b1169	E-EE	putative ATP-binding component of a transport system [b1169]	Metabolic process	Other cell processes
ygeX	E-EE	putative dehydratase [b2871]	Metabolic process	Other cell processes
yagX	E-EE	putative enzyme [b0291]	Metabolic process	Other cell processes
paaF	E-EE	putative enzyme [b1393]	Metabolic process	Other cell processes
paaH	E-EE	putative enzyme [b1395]	Metabolic process	Other cell processes
yjiL	E-EE	putative enzyme [b4334]	Metabolic process	Other cell processes
Z0243	E-EE	putative enzyme Unknown function [Z0243]	Metabolic process	Other cell processes
frmB	E-EE	putative esterase [b0355]	Metabolic process	Other cell processes
yaiM	E-EE	putative esterase [Z0455]	Metabolic process	Other cell processes
ykgJ	E-EE	putative ferredoxin [b0288]	Metabolic process	Other cell processes
agaI	E-EE	putative galactosamine-6-phosphate isomerase [b3141]	Metabolic process	Other cell processes
Z4497	E-EE	putative galactosamine-6-phosphate isomerase [Z4497]	Metabolic process	Other cell processes
allB	E-EE	putative hydrolase [b0512]	Metabolic process	Other cell processes
ECs2617	E-EE	putative integrase [ECs2617]	Metabolic process	Other cell processes
yqeA	E-EE	putative kinase [b2874]	Metabolic process	Other cell processes
yggC	E-EE	putative kinase [b2928]	Metabolic process	Other cell processes
yiaL	E-EE	putative lipase [b3576]	Metabolic process	Other cell processes
allD	E-EE	putative malate dehydrogenase [b0517]	Metabolic process	Other cell processes
ECs0022	E-EE	putative outer membrane usher protein precursor [ECs0022]	Metabolic process	Other cell processes
ydiO	E-EE	putative oxidoreductase [b1695]	Metabolic process	Other cell processes
ygcW	E-EE	putative oxidoreductase [b2774]	Metabolic process	Other cell processes
b2885	E-EE	putative oxidoreductase [b2885]	Metabolic process	Other cell processes
ygcU	E-EE	putative oxidoreductase subunit [b2773]	Metabolic process	Other cell processes
ygfT	E-EE	putative oxidoreductase, Fe-S subunit [b2887]	Metabolic process	Other cell processes
ybfP	E-EE	putative pectinase [b0689]	Metabolic process	Other cell processes
pppA	E-EE	putative peptidase [b2972]	Metabolic process	Other cell processes
c_2424	E-EE	Putative peptide synthetase [c_2424]	Metabolic process	Other cell processes
c_2436	E-EE	Putative pesticin receptor precursor [c_2436]	Metabolic process	Other cell processes
Z4487	E-EE	putative phosphotransferase system enzyme subunit [Z4487]	Metabolic process	Other cell processes
ECs2634	E-EE	putative plasmid partition protein [ECs2634]	Metabolic process	Other cell processes
ycgG	E-EE	putative proteases [b1168]	Metabolic process	Other cell processes
c_3712	E-EE	Putative saframycin Mx1 synthetase B [c_3712]	Metabolic process	Other cell processes
yeeU	E-EE	putative structural protein [b2004]	Metabolic process	Other cell processes
yqeB	E-EE	putative synthases [b2875]	Metabolic process	Other cell processes
b0359	E-EE	putative transferase [b0359]	Metabolic process	Other cell processes
c_0468	E-EE	Putative transferase [c_0468]	Metabolic process	Other cell processes
c_2489	E-EE	Putative transferase [c_2489]	Metabolic process	Other cell processes
ECs2847	E-EE	putative UDP-galactose 4-epimerase [ECs2847]	Metabolic process	Other cell processes
Z3206	E-EE	putative UDP-galactose 4-epimerase [Z3206]	Metabolic process	Other cell processes
Z0022	E-EE	putative usher protein [Z0022]	Metabolic process	Other cell processes
yagT	E-EE	putative xanthine dehydrogenase [b0286]	Metabolic process	Other cell processes
cadB	E-EE	transport of lysine/cadaverine [Z5735]	Metabolic process	Other cell processes
yeiI	E-EE	Hypothetical sugar kinase yeiI [c_2695]	Metabolic process	Other cell processes
rfaC	E-EE	Lipopolysaccharide heptosyltransferase-1 [c_4447]	Metabolic process	Other cell processes
cadA	E-EE	lysine decarboxylase 1 [b4131]	Metabolic process	Other cell processes
feaB	E-EE	phenylacetaldehyde dehydrogenase [b1385]	Metabolic process	Other cell processes
ygfT	E-EE	Hypothetical protein ygfT [c_3464]; fused putative oxidoreductase, Fe-S subunit and nucleotide-binding subunit (PubMed)	Metabolic process	Other cell processes
ynjF	E-EE	Hypothetical protein ynjF [c_2159]; putative phosphatidyl transferase, inner membrane protein (PubMed)	Metabolic process	Other cell processes
phnI	E-EE	PhnI protein [c_5105]; carbon-phosphorus lyase core complex subunit PhnI (PubMed)	Metabolic process	Other cell processes
phnO	E-EE	PhnO protein [c_5099]; aminoalkylphosphonate N-acetyltransferase (PubMed)	Metabolic process	Other cell processes
c_3153	E-EE	Putative outer membrane protein of prophage [c_3153]	Outer membrane	Membrane/structural proteins
yfeN	E-EE	Hypothetical protein yfeN [c_2941]; conserved outer membrane protein YfeN (PubMed)	Outer membrane	Membrane/structural proteins
ymgB	E-EE	Hypothetical protein ymgB [c_1609]; alias ariR regulator of acid resistance, influenced by indole (PubMed)	pH stress	Other cell processes
L7011	E-EE	hypothetical protein [L7011]	pO157 gene	Other "foreign" genes
Z0339	E-EE	alpha replication protein of prophage CP-933I [Z0339]	Prophage gene	Other "foreign" genes
racC	E-EE	defective prophage rac; contains recE and oriJ [b1351]	Prophage gene	Other "foreign" genes
Z2979	E-EE	putative stability/partitioning protein encoded within prophage CP-933T [Z2979]	Prophage gene	Other "foreign" genes
Z2986	E-EE	putative tail fiber protein of prophage CP-933T [Z2986]	Prophage gene	Other "foreign" genes
Z3311	E-EE	putative tail fiber protein of prophage CP-933V [Z3311]	Prophage gene	Other "foreign" genes
Z1840	E-EE	unknown protein encoded by prophage CP-933C [Z1840]	Prophage gene	Other "foreign" genes
Z2967	E-EE	unknown protein encoded by prophage CP-933T [Z2967]	Prophage gene	Other "foreign" genes
Z2969	E-EE	unknown protein encoded by prophage CP-933T [Z2969]	Prophage gene	Other "foreign" genes
Z2976	E-EE	unknown protein encoded by prophage CP-933T [Z2976]	Prophage gene	Other "foreign" genes
Z2095	E-EE	unknown protein encoded within prophage CP-933O [Z2095]	Prophage gene	Other "foreign" genes
Z3123	E-EE	unknown protein encoded within prophage CP-933U [Z3123]	Prophage gene	Other "foreign" genes
Z0313	E-EE	partial replication protein P for prophage CP-933H [Z0313]	Prophage gene	Other "foreign" genes
ECs2640	E-EE	phage tail protein [ECs2640]	Prophage gene	Other "foreign" genes
c_0278 (yafZ)	E-EE	Hypothetical protein yafZ [c_0278]; CP4-6 prophage (PubMed)	Prophage gene	Other "foreign" genes
ydfD	E-EE	Hypothetical protein ydfD [c_1404]; Qin prophage; lysis protein (PubMed)	Prophage gene	Other "foreign" genes
c_3676 (yeeU)	E-EE	Hypothetical protein yeeU [c_3676]; alias cbeA CP4-44 prophage; cytoskeleton bundling-enhancing antitoxin CbeA (PubMed)	Prophage gene	Other "foreign" genes
c_4576 (yeeV)	E-EE	Hypothetical protein yeeV [c_4576]; alias cbtA CP4-44 prophage; cytoskeleton-binding toxin CbtA (PubMed)	Prophage gene	Other "foreign" genes
c_1272 (yeeP)	E-EE	Hypothetical protein yeeP [c_1272]	Pseudogene	Unknown/Pseudogene
b1401	E-EE	split orf [b1401]; alias ydbA	Pseudogene	Unknown/Pseudogene
agaR	E-EE	putative DEOR-type transcriptional regulator of aga operon [b3131]	Regulator protein	Regulator protein
ECs2631	E-EE	putative derepression protein [ECs2631]	Regulator protein	Regulator protein
frvR	E-EE	putative frv operon regulatory protein [b3897]	Regulator protein	Regulator protein
frvR	E-EE	putative frv operon regulatory protein [Z5440]	Regulator protein	Regulator protein
yfaX	E-EE	putative regulator [b2248]	Regulator protein	Regulator protein
psb1	E-EE	putative regulator of SOS induction [L7087]	Regulator protein	Regulator protein
phnO	E-EE	putative regulator, phn operon [b4093]	Regulator protein	Regulator protein
yqeI	E-EE	putative sensory transducer [b2847]	Regulator protein	Regulator protein
zntR	E-EE	putative transcriptional regulator [b3292]	Regulator protein	Regulator protein
yagP	E-EE	putative transcriptional regulator LYSR-type [b0282]	Regulator protein	Regulator protein
xapR	E-EE	regulator for xapA [b2405]	Regulator protein	Regulator protein
dpiA	E-EE	sequence similarity to Shigella regulator [b0620]	Regulator protein	Regulator protein
mhpR	E-EE	transcriptional regulator for mhp operon [b0346]	Regulator protein	Regulator protein
ycgF	E-EE	Hypothetical protein ycgF [c_1606]; alias bluF; blue light-responsive regulator of BluR (PubMed)	Regulator protein	Regulator protein
ycgZ	E-EE	Hypothetical protein ycgZ [c_1607]; putative two-component system connector protein YcgZ (PubMed)	Regulator protein	Regulator protein
ECs2643	E-EE	putative tail protein [ECs2643]	Tail protein	Other "foreign" genes
cpb2	E-EE	CopB protein (RepA2 protein) [L7006]	Transcription	Other cell processes
agaR	E-EE	Putative aga operon transcriptional repressor [c_3886]	Transcription	Other cell processes
ygeY	E-EE	putative deacetylase [Z4211]	Transcription	Other cell processes
alsB	E-EE	putative LACI-type transcriptional regulator [b4088]	Transcription	Other cell processes
alsK	E-EE	putative NAGC-like transcriptional regulator [b4084]	Transcription	Other cell processes
gspA	E-EE	putative export protein A for general secretion pathway [b3323]	Transport	Other cell processes
gspI	E-EE	putative export protein for general secretion pathway [b3330]	Transport	Other cell processes
yghF	E-EE	putative general secretion pathway for protein export [b2970]	Transport	Other cell processes
yghD	E-EE	Putative general secretion pathway protein M-type yghD [c_3699]	Transport	Other cell processes
c_2422	E-EE	Putative inner membrane ABC-transporter [c_2422]	Transport	Other cell processes
yjdL	E-EE	putative peptide transporter [b4130]	Transport	Other cell processes
ybbY	E-EE	putative transport [b0513]	Transport	Other cell processes
mhpT	E-EE	putative transport protein [b0353]	Transport	Other cell processes
yajR	E-EE	putative transport protein [b0427]	Transport	Other cell processes
mdtG	E-EE	putative transport protein [b1053]	Transport	Other cell processes
ygbN	E-EE	putative transport protein [b2740]	Transport	Other cell processes
ECs0481	E-EE	putative transport protein [ECs0481]	Transport	Other cell processes
ECs3631	E-EE	putative transport protein [ECs3631]	Transport	Other cell processes
yajR	E-EE	putative transport protein [Z0530]	Transport	Other cell processes
yqcE	E-EE	putative transport protein [Z4086]	Transport	Other cell processes
alsC	E-EE	putative transport system permease protein [b4086]	Transport	Other cell processes
setC	E-EE	two-module transport protein [b3659]	Transport	Other cell processes
ybfQ	E-EE	predicted transposase [b4514]	Transposase	Other "foreign" genes
Z4181	E-EE	putative Type III secretion apparatus protein [Z4181]	Type III secretion	Virulence factors
ECs3726	E-EE	type III secretion protein EpaO [ECs3726]	Type III secretion	Virulence factors
ECs3718	E-EE	type III secretion protein EprI [ECs3718]	Type III secretion	Virulence factors
ECs3717	E-EE	type III secretion protein EprJ [ECs3717]	Type III secretion	Virulence factors
c_2193	E-EE	Conserved hypothetical protein [c_2193]	Unknown	Unknown/Pseudogene
c_2522	E-EE	Conserved hypothetical protein [c_2522]	Unknown	Unknown/Pseudogene
yjdP	E-EE	conserved protein [b4487]	Unknown	Unknown/Pseudogene
rhsC	E-EE	rhsC protein in rhs element, interrupted [Z0847]	Unknown	Unknown/Pseudogene
yaiL	E-EE	Hypothetical protein yaiL [c_0462]; DUF2058 domain-containing protein YaiL (PubMed)	Unknown	Unknown/Pseudogene
ydbL	E-EE	Hypothetical protein ydbL precursor [c_1830]; DUF1318 domain-containing protein YdbL (PubMed)	Unknown	Unknown/Pseudogene
yeaR	E-EE	Hypothetical protein yeaR [c_2204]; DUF1971 domain-containing protein YeaR (PubMed)	Unknown	Unknown/Pseudogene
yegL	E-EE	Hypothetical protein yegL [c_2599]; IPR002035 domain-containing protein YegL (PubMed)	Unknown	Unknown/Pseudogene
yehP	E-EE	Hypothetical protein yehP [c_2651]; VWA domain-containing protein YehP (PubMed)	Unknown	Unknown/Pseudogene
ECs0218	E-EE	IcmF-like protein [ECs0218]	Unknown	Unknown/Pseudogene
