# Supplementary material for: Enteroinvasive <em>Escherichia Coli</em> is Inefficient to Escape from Autophagy during Caco-2 Cellular Infection
Source: Preprints.org preprint supplement (doi:10.20944/preprints202202.0321.v1), 2022-02-25
Supplement: Supplementary file 6 [file TableS2_BandoSY.xlsx]

## Sheet: Table S2
Table S2. Genes included for EIEC or S. flexneri co-expression networks construction.
Gene	Profile	Gene description	Expression profile in EIEC
ACA-0244216	DE	cytotoxic protein LetB	Hyper
acpH	DE	putative glycoprotein [b0404]	Hypo
adhE	DE	CoA-linked acetaldehyde dehydrogenase and iron-dependent alcohol dehydrogenase; pyruvate-formate-lyase deactivase [b1241]	Hyper
adiY	DE	putative ARAC-type regulatory protein [b4116]	Hyper
argH	DE	argininosuccinate lyase [Z5518]	Hypo
aroC	DE	chorismate synthase [b2329]	Hypo
ascF	DE	PTS system enzyme II ABC [b2715]	Hypo
ascG	DE	ascBF operon repressor [b2714]	Hypo
b2931	DE	putative oxidoreductase [b2931]	Hypo
b3695	DE	regulator protein for dgo operon [b3695]	HHypo
c_0396	DE	Insertion element IS1 1/2/3/5/6 protein insA [c_0396]	Hyper
c_0460	DE	LacI protein [c_0460]	Hyper
c_1225	DE	Transposase insE for insertion sequence IS3A/B/C/D/E/fA/fB [c_1225]	HHypo
c_1445	DE	Putative DNA packaging protein of prophage terminase [c_1445]	Hyper
c_1572	DE	Putative capsid assembly protein of prophage [c_1572]	Hypo
c_1587	DE	Putative tail component of prophage [c_1587]	Hypo
c_1588	DE	Putative tail component of prophage [c_1588]	Hypo
c_2026	DE	Hypothetical transporter ydgR [c_2026]	Hypo
c_2059	DE	Protein ydhR precursor [c_2059]	Hyper
c_2388	DE	Transthyretin-like protein precursor [c_2388]	Hyper
c_2485	DE	Hypothetical protein ybdN [c_2485]	HHyper
c_2503	DE	Transposase [c_2503]	Hypo
c_2511	DE	Insertion sequence ATP-binding protein [c_2511]	Hyper
c_2670	DE	Putative conserved protein [c_2670]	Hypo
c_2922	DE	Putative phosphoenolpyruvate-protein phosphotransferase ypdD [c_2922]	HHypo
c_3116	DE	Ribosomal large subunit pseudouridine synthase D [c_3116]	Hypo
c_3155	DE	Putative tail component of prophage [c_3155]	Hypo
c_3167	DE	Putative DNA packaging protein of prophage [c_3167]	HHypo
c_5341	DE	Mg [c_5341]	Hypo
cbl	DE	transcriptional regulator cys regulon; accessory regulatory circuit affecting cysM [b1987]	Hyper
ccdA	DE	pINV gene	Hyper
cdh	DE	CDP-diacylglycerol phosphotidylhydrolase [b3918]	Hyper
cspC	DE	cold shock protein [b1823]	Hyper
cspE	DE	Cold shock-like protein cspE [c_0714]	Hyper
cspG	DE	homolog of Salmonella cold shock protein [b0990]	Hyper
cstA	DE	carbon starvation protein [b0598]	Hypo
cyoA	DE	cytochrome o ubiquinol oxidase subunit II [b0432]	Hyper
cysH	DE	3-phosphoadenosine 5-phosphosulfate reductase [b2762]	Hypo
cysI	DE	sulfite reductase, alpha subunit [b2763]	Hypo
cysP	DE	thiosulfate binding protein [b2425]	Hypo
dgoA	DE	2-oxo-3-deoxygalactonate 6-phosphate aldolase and galactonate dehydratase [b3692]	HHypo
dgoT	DE	D-galactonate transport [b3691]	Hypo
dinD	DE	DNA-damage-inducible protein [b3645]	Hypo
dkgB	DE	putative aldose reductase [b0207]	Hypo
dsbG	DE	Thiol:disulfide interchange protein dsbG precursor [c_0692]	HHypo
ECs0539	DE	putative amino acid/amine transport protein [ECs0539]	Hypo
ECs0629	DE	ferric enterobactin [ECs0629]	Hypo
ECs0778	DE	quinolinate synthetase A protein [ECs0778]	Hypo
ECs0794	DE	putative phosphatase [ECs0794]	Hypo
ECs0810	DE	NinE protein [ECs0810]	Hypo
ECs0819	DE	endolysin [ECs0819]	HHyper
ECs0832	DE	putative minor tail protein [ECs0832]	Hypo
ECs0833	DE	putative minor tail protein [ECs0833]	HHypo
ECs0834	DE	putative major tail protein [ECs0834]	HHypo
ECs0836	DE	putative minor tail protein [ECs0836]	Hypo
ECs0838	DE	putative minor tail protein [ECs0838]	Hypo
ECs0840	DE	putative tail assembly protein [ECs0840]	Hypo
ECs1645	DE	minor tail protein [ECs1645]	Hypo
ECs1697	DE	putative ferric enterobactin transport ATP-binding protein [ECs1697]	Hypo
ECs2128	DE	altronate oxidoreductase [ECs2128]	Hypo
ECs2139	DE	multiple antibiotic resistance protein [ECs2139]	Hyper
ECs2184	DE	putative endopeptidase [ECs2184]	Hyper
ECs2517	DE	putative enzyme [ECs2517]	Hypo
ECs3000	DE	putative host-nuclease inhibitor protein Gam [ECs3000]	Hyper
ECs3104	DE	outer membrane protein C OmpC [ECs3104]	Hyper
ECs3263	DE	putative PTS system enzyme IIA component [ECs3263]	HHypo
ECs3296	DE	thiosulfate binding protein [ECs3296]	Hypo
ECs4244	DE	putative transport [ECs4244]	Hypo
ECs4266	DE	repressor of the glp operon [ECs4266]	Hypo
ECs4519	DE	putative alpha helix protein [ECs4519]	Hypo
ECs4889	DE	argininosuccinate lyase [ECs4889]	Hypo
ECs5182	DE	putative transposase TnpA of insertion sequence IS609 [ECs5182]	Hypo
ECs5183	DE	putative transposase TnpB of insertion sequence IS609 [ECs5183]	Hypo
entA	DE	2,3-dihydro-2,3-dihydroxybenzoate dehydrogenase [c_0683]	HHypo
entB	DE	2,3-dihydro-2,3-dihydroxybenzoate synthetase, isochroismatase [b0595]	Hypo
entE	DE	2,3-dihydroxybenzoate-AMP ligase [b0594]	HHypo
etp	DE	putative phosphatase [Z1399]	Hyper
evgS	DE	putative sensor for regulator EvgA [Z3632]	Hyper
exbD	DE	uptake of enterochelin; tonB-dependent uptake of B colicins [b3005]	Hypo
fadA	DE	3-ketoacyl-CoA thiolase [c_4792]	Hypo
fdhE	DE	Protein fdhE [c_4841]	Hyper
fepB	DE	ferric enterobactin [b0592]	Hypo
fimG	DE	fimbrial morphology [b4319]	Hyper
fimH	DE	minor fimbrial subunit, D-mannose specific adhesin [b4320]	Hyper
flhA	DE	flagellar biosynthesis; possible export of flagellar proteins [b1879]	Hypo
flhE	DE	flagellar protein [b1878]	Hypo
folK	DE	7,8-dihydro-6-hydroxymethylpterin-pyrophosphokinase [Z0153]	Hypo
fryA	DE	putative PTS system enzyme IIA component, enzyme I [b2383]	HHypo
ftsI	DE	septum formation; penicillin-binding protein 3; peptidoglycan synthetase [b0084]	Hypo
ftsP	DE	suppressor of ftsI [b3017]	Hyper
ftsQ	DE	cell division protein; ingrowth of wall at septum [b0093]	Hypo
ftsW	DE	cell division; membrane protein involved in shape determination [b0089]	Hypo
galF	DE	homolog of Salmonella UTP--glucose-1-P uridyltransferase, probably a UDP-gal transferase [b2042]	Hyper
gatY	DE	Tagatose-bisphosphate aldolase gatY [c_2621]	Hypo
gltD	DE	glutamate synthase, small subunit [b3213]	Hypo
gntK	DE	Thermoresistant gluconokinase [c_4225]	Hypo
hemH	DE	ferrochelatase: final enzyme of heme biosynthesis [b0475]	Hypo
pWR501_0277_S	DE	pINV gene	Hyper
hypC	DE	pleiotrophic effects on 3 hydrogenase isozymes [b2728]	Hyper
idi	DE	putative enzyme [b2889]	Hyper
insB_pWR501_0226	DE	pINV gene	Hyper
insK	DE	IS150 putative transposase [b3558]	Hyper
ipaC	DE	pINV gene	Hyper
IpaH4_5	DE	pINV gene	Hyper
ipgH	DE	pINV gene	Hyper
kdgK	DE	2-dehydro-3-deoxygluconokinase [c_4337]	Hyper
kefB	DE	K+ efflux; NEM-activable K+/H+ antiporter [b3350]	Hypo
L7004	DE	putative hemolysin expression modulating protein [L7004]	Hyper
ldcC	DE	lysine decarboxylase 2, constitutive [b0186]	Hypo
ldhA	DE	fermentative D-lactate dehydrogenase, NAD-dependent [b1380]	Hyper
lipA	DE	lipoate synthesis, sulfur insertion? [b0628]	Hyper
lldD	DE	L-lactate dehydrogenase [b3605]	HHyper
manX	DE	PTS enzyme IIAB, mannose-specific [b1817]	Hyper
marA	DE	multiple antibiotic resistance; transcriptional activator of defense systems [b1531]	HHyper
marB	DE	multiple antibiotic resistance protein [Z2169]	Hyper
marR	DE	multiple antibiotic resistance protein; repressor of mar operon [b1530]	HHyper
metF	DE	5,10-methylenetetrahydrofolate reductase [b3941]	Hyper
metJ	DE	Met repressor [c_4891]	Hyper
metK	DE	methionine adenosyltransferase 1 [b2942]	Hyper
mgtA	DE	Mg2+ transport ATPase, P-type 1 [b4242]	Hypo
mngA	DE	protein modification enzyme, induction of ompC [b0731]	Hyper
mppA	DE	putative transport periplasmic protein [b1329]	Hyper
mscL	DE	Large-conductance mechanosensitive channel [c_4051]	Hyper
mukB	DE	Cell division protein mukB [c_1066]	Hypo
mukF	DE	mukF protein [Z1269]	Hypo
murB	DE	UDP-N-acetylenolpyruvoylglucosamine reductase [c_4931]	Hypo
murC	DE	L-alanine adding enzyme, UDP-N-acetyl-muramate:alanine ligase [b0091]	Hypo
murQ	DE	putative regulator [b2428]	Hypo
mvpA	DE	pINV gene	Hypo
nadA	DE	Quinolinate synthetase A [c_0825]	Hypo
nadB	DE	quinolinate synthetase, B protein [b2574]	Hypo
narH	DE	nitrate reductase 1, beta subunit [b1225]	Hypo
narJ	DE	nitrate reductase 1, delta subunit, assembly function [b1226]	Hypo
nirD	DE	nitrite reductase [b3366]	Hyper
ompC	DE	outer membrane protein 1b [Z3473]	Hyper
ompX	DE	outer membrane protein X [b0814]	Hyper
pbpC	DE	Penicillin-binding protein 1C [c_3042]	HHypo
pdhR	DE	transcriptional regulator for pyruvate dehydrogenase complex [b0113]	Hyper
pflB	DE	formate acetyltransferase 1 [b0903]	Hyper
pgl	DE	putative isomerase [b0767]	Hypo
pheA	DE	chorismate mutase-P and prephenate dehydratase [b2599]	Hyper
phoB	DE	positive response regulator for pho regulon, sensor is PhoR [b0399]	Hyper
pldA	DE	outer membrane phospholipase A [b3821]	Hyper
pspF	DE	psp operon transcriptional activator [b1303]	HHypo
pstA	DE	high-affinity phosphate-specific transport system [b3726]	Hyper
pstB	DE	ATP-binding component of high-affinity phosphate-specific transport system [b3725]	Hyper
pstC	DE	high-affinity phosphate-specific transport system, cytoplasmic membrane component [b3727]	Hyper
pstS	DE	high-affinity phosphate-specific transport system; periplasmic phosphate-binding protein [b3728]	Hyper
puuP	DE	putative amino acid/amine transport protein [b1296]	Hypo
pWR501_0006_S0006	DE	pINV gene	Hyper
pWR501_0007_S0007	DE	pINV gene	Hyper
pWR501_0025_S0025	DE	pINV gene	Hyper
pWR501_0031_S0031	DE	pINV gene	Hyper
pWR501_0034_S0034	DE	pINV gene	Hyper
pWR501_0035_S0035	DE	pINV gene	Hyper
pWR501_0036_S0036	DE	pINV gene	Hyper
pWR501_0037_S0037	DE	pINV gene	Hyper
pWR501_0038_S0038	DE	pINV gene	Hyper
pWR501_0046_S0046	DE	pINV gene	Hyper
pWR501_0049_S0049	DE	pINV gene	Hyper
pWR501_0050_S0050	DE	pINV gene	Hyper
pWR501_0066_S0066	DE	pINV gene	Hyper
pWR501_0081_S0081	DE	pINV gene	Hyper
pWR501_0082_S0082	DE	pINV gene	Hyper
pWR501_0083_S0083	DE	pINV gene	Hyper
pWR501_0088_S0088	DE	pINV gene	Hyper
pWR501_0117_S0117	DE	pINV gene	Hypo
pWR501_0118_S0118	DE	pINV gene	Hypo
pWR501_0119_S0119	DE	pINV gene	Hypo
pWR501_0120_S0120	DE	pINV gene	Hypo
pWR501_0121_S0121	DE	pINV gene	Hyper
pWR501_0122_S0122	DE	pINV gene	Hyper
pWR501_0128_S0128	DE	pINV gene	Hypo
pWR501_0200_S020	DE	pINV gene	Hyper
pWR501_0219_S021	DE	pINV gene	Hypo
pWR501_0227_S0227	DE	pINV gene	Hyper
pWR501_0230_S0230	DE	pINV gene	Hyper
pWR501_0231_S0231	DE	pINV gene	Hyper
pWR501_0277_S	DE	pINV gene	Hyper
relA	DE	(p)ppGpp synthetase I/GTP pyrophosphokinase [b2784]	Hypo
rfaC	DE	Lipopolysaccharide heptosyltransferase-1 [c_4447]	Hyper
rhaD	DE	rhamnulose-phosphate aldolase [Z5446]	Hypo
rnb	DE	RNase II, mRNA degradation [b1286]	Hypo
rpiA	DE	ribosephosphate isomerase, constitutive [b2914]	Hyper
rutR	DE	putative tet operon regulator [b1013]	Hypo
secA	DE	preprotein translocase; secretion protein [b0098]	Hypo
sgaU	DE	putative hexulose-6-phosphate isomerase [Z5806]	Hypo
sitA	DE	SitA protein [c_1600]	Hypo
sitB	DE	SitB protein [c_1599]	Hypo
sitD	DE	SitD protein [c_1597]	Hypo
slyB	DE	putative outer membrane protein [b1641]	Hyper
sopA	DE	pINV gene	Hyper
spa24	DE	pINV gene	Hyper
spa29	DE	pINV gene	HHyper
spa40	DE	pINV gene	Hyper
spa-orf10	DE	pINV gene	Hyper
srmB	DE	ATP-dependent RNA helicase srmB [c_3100]	Hyper
sufC	DE	putative ATP-binding component of a transport system [b1682]	Hypo
sulA	DE	suppressor of lon; inhibits cell division and ftsZ ring formation [b0958]	HHyper
syd	DE	interacts with secY [b2793]	HHypo
tam	DE	Trans-aconitate 2-methyltransferase [c_1942]	Hypo
thrC	DE	threonine synthase [b0004]	Hypo
tnpE	DE	pINV gene	Hyper
tnpF	DE	pINV gene	Hypo
tnpG	DE	pINV gene	Hypo
tnpG	DE	pINV gene	Hypo
tnpG	DE	pINV gene	Hypo
torD	DE	part of trimethylamine-N-oxide oxidoreductase [Z1416]	HHypo
tppB	DE	putative transport protein [b1634]	Hypo
traI	DE	pINV gene	Hyper
traI	DE	pINV gene	Hyper
treA	DE	trehalase, periplasmic [b1197]	Hypo
ugd	DE	UDP-glucose 6-dehydrogenase [b2028]	Hypo
ulaF	DE	putative epimerase/aldolase [b4198]	Hypo
umuC	DE	SOS mutagenesis and repair [b1184]	Hyper
umuD	DE	SOS mutagenesis; error-prone repair; processed to UmuD; forms complex with UmuC [b1183]	Hyper
uxuR	DE	Uxu operon transcriptional regulator [c_5404]	Hyper
virA	DE	pINV gene	Hyper
yadL	DE	putative fimbrial protein [b0137]	Hyper
yajB	DE	Hypothetical protein yajB [c_0514]	Hypo
ybdD	DE	conserved protein [b4512]	Hypo
ybhA	DE	putative phosphatase [Z0936]	Hypo
ybjP	DE	putative enzyme [Z1095]	Hypo
ybjS	DE	putative nucleotide di-P-sugar epimerase or dehydratase [b0868]	Hyper
ycaM	DE	putative transport [b0899]	Hyper
ycgV	DE	putative adhesion and penetration protein [b1202]	HHypo
ycjZ	DE	putative transcriptional regulator LYSR-type [b1328]	Hyper
yeeF	DE	putative amino acid/amine transport protein [b2014]	Hyper
yejB	DE	putative transport system permease protein [b2178]	Hypo
yfbQ	DE	putative aminotransferase [b2290]	Hypo
yfcA	DE	putative structural protein [b2327]	Hypo
ygaC	DE	Hypothetical protein ygaC [c_3222]	Hypo
ygjU	DE	Hypothetical symporter ygjU [c_3847]	Hypo
yhbU	DE	putative collagenase [b3158]	Hyper
yhgE	DE	Hypothetical protein yhgE [c_4173]	Hypo
yhhX	DE	putative regulator [b3440]	Hypo
yhiD	DE	putative transport ATPase [b3508]	Hyper
yiaC	DE	Hypothetical acetyltransferase yiaC [c_4368]	Hypo
yiaK	DE	putative dehydrogenase [b3575]	Hypo
yibD	DE	putative regulator [b3615]	Hyper
yibH	DE	putative membrane protein [b3597]	HHypo
yicC	DE	putative alpha helix protein [Z5069]	Hypo
yidX	DE	putative replicase EC 2.7.- [b3696]	Hypo
yihA	DE	pINV gene	Hyper
yihV	DE	putative kinase [b3883]	Hypo
yiiL	DE	Hypothetical protein yiiL [c_4850]	Hypo
yjfC	DE	putative synthetase/amidase [b4186]	Hypo
yjfM	DE	Hypothetical protein yjfM [c_5272]	Hypo
yjjV	DE	Putative deoxyribonuclease yjjV [c_5461]	Hypo
ymdF	DE	conserved protein [b4518]	Hyper
yphC	DE	putative oxidoreductase [b2545]	Hypo
ypjA	DE	putative ATP-binding component of a transport system [b2647]	Hyper
yqhD	DE	putative oxidoreductase [b3011]	Hyper
Z0960	DE	putative lysozyme protein R of prophage CP-933K [Z0960]	HHyper
Z0970	DE	putative tail component of prophage CP-933K [Z0970]	Hypo
Z0971	DE	putative tail component of prophage CP-933K [Z0971]	HHypo
Z0974	DE	putative tail component of prophage CP-933K [Z0974]	HHypo
Z0978	DE	putative tail component of prophage CP-933K [Z0978]	Hypo
Z1352	DE	putative endolysin of cryptic prophage CP-933M [Z1352]	Hypo
Z1376	DE	putative tail component encoded by cryptic prophage [Z1376]	Hypo
Z1826	DE	putative IS encoded protein [Z1826]	Hypo
Z2397	DE	unknown protein encoded within prophage CP-933R [Z2397]	Hypo
Z2562	DE	putative transposase [Z2562]	Hypo
Z2851	DE	putative enzyme [Z2851]	Hypo
Z3082	DE	putative tail fiber component L of prophage [Z3082]	Hypo
Z3124	DE	unknown protein encoded within prophage CP-933U [Z3124]	Hyper
Z3365	DE	putative host-nuclease inhibitor protein Gam of prophage [Z3365]	Hyper
Z3648	DE	putative PTS system enzyme IIA component, enzyme [Z3648]	HHypo
Z3664	DE	putative virulence protein [Z3664]	HHypo
Z3817	DE	putative oxidoreductase [Z3817]	Hypo
Z3818	DE	putative oxidoreductase [Z3818]	Hypo
Z4403	DE	putative membrane protein [Z4403]	Hypo
Z5816	DE	putative virulence protein [Z5816]	Hypo
rimL	S-EE	acetylation of N-terminal serine of 30S ribosomal subunit protein L7; acetyl transferase [b1427]
azoR	S-EE	acyl carrier protein phosphodiesterase [b1412]
aldA	S-EE	aldehyde dehydrogenase, NAD-linked [b1415]
aslA	S-EE	arylsulfatase [b3801]
chaC	S-EE	cation transport regulator [b1218]
betA	S-EE	Choline dehydrogenase [c_0431]
betA	S-EE	choline dehydrogenase, a flavoprotein [b0311]
betA	S-EE	choline dehydrogenase, a flavoprotein [Z0398]
c_3523	S-EE	Conserved hypothetical protein [c_3523]
cybB	S-EE	cytochrome b [b1418]
rfbB	S-EE	dTDP-glucose 4,6 dehydratase [b2041]
emrE	S-EE	EmrE protein [c_2352]
recE	S-EE	Exodeoxyribonuclease VIII [c_1402]
sbcB	S-EE	exonuclease I, 3 --> 5 specific; deoxyribophosphodiesterase [b2011]
fimF	S-EE	FimF protein precursor [c_5397]
flhE	S-EE	Flagellar protein flhE precursor [c_2292]
fdnI	S-EE	formate dehydrogenase-N, nitrate-inducible, cytochrome B556 [b1476]
fdnH	S-EE	formate dehydrogenase-N, nitrate-inducible, iron-sulfur beta subunit [b1475]
hrpA	S-EE	helicase, ATP-dependent [b1413]
ECs4499	S-EE	heptosyl transferase I [ECs4499]
ECs4356	S-EE	HicB-like protein [ECs4356]
betT	S-EE	high-affinity choline transport [b0314]
ECs0360	S-EE	high-affinity choline transport [ECs0360]
betT	S-EE	High-affinity choline transport protein [c_0434]
c_1870	S-EE	Hypothetical protein ydcX [c_1870]
yddM	S-EE	Hypothetical protein yddM [c_1909]
yfcA	S-EE	Hypothetical protein yfcA [c_2873]
c_3273	S-EE	Hypothetical protein ygjM [c_3273]
ynbA	S-EE	Hypothetical protein ynbA [c_1834]
yjiZ	S-EE	Hypothetical transport protein yjjL [c_4921]
insB	S-EE	Insertion element IS1 1/5/6 protein insB [c_4504]
iucA	S-EE	IucA protein [c_3627]
iucB	S-EE	IucB protein [c_3626]
iucC	S-EE	IucC protein [c_3625]
c_1542	S-EE	Lambda ant-restriction protein [c_1542]
ECs4500	S-EE	lipid A-core:surface polymer ligase [ECs4500]
ECs4503	S-EE	lipopolysaccharide core biosynthesis protein WaaY [ECs4503]
ECs5273	S-EE	major type 1 subunit fimbrin [ECs5273]
ECs0811	S-EE	NinF protein [ECs0811]
ynbA	S-EE	probable enzyme [b1408]
ybcL	S-EE	Protein ybcL precursor [c_2350]
ECs3802	S-EE	putative ABC transporter ATP-binding subunit [ECs3802]
ydcW	S-EE	putative aldehyde dehydrogenase [b1444]
yidL	S-EE	putative ARAC-type regulatory protein [b3680]
ddpF	S-EE	putative ATP-binding component of a transport system [b1483]
c_3509	S-EE	Putative ATP-binding protein of ABC transport system [c_3509]
ydcP	S-EE	putative collagenase [b1435]
c_1874	S-EE	Putative conserved protein [c_1874]
ECs2464	S-EE	putative cytochrome oxidase [ECs2464]
c_0330	S-EE	Putative deoxyribose operon repressor [c_0330]
ynfE	S-EE	Putative dimethyl sulfoxide reductase chain ynfE precursor [c_1977]
ydaV	S-EE	putative DNA replication factor [b1360]
ECs1945	S-EE	putative DNA replication factor [ECs1945]
Z2396	S-EE	putative DNA replication factor encoded by prophage [Z2396]
Z6069	S-EE	putative DNA replication factor encoded within cryptic [Z6069]
ECs2275	S-EE	putative DNA replication protein [ECs2275]
Z2101	S-EE	putative endonuclease encoded within prophage CP-933O [Z2101]
Z2057	S-EE	putative endonuclease of prophage CP-933O [Z2057]
exoP	S-EE	putative exodeoxyribonuclease encoded by cryptic prophage CP-933P [Z6080]
ECs1759	S-EE	putative exonuclease [ECs1759]
exoO	S-EE	putative exonuclease VIII, ds DNA exonuclease, 5 [Z2037]
ECs3242	S-EE	putative fructokinase [ECs3242]
ECs1100	S-EE	putative holin protein [ECs1100]
ECs2188	S-EE	putative holin protein [ECs2188]
Z1794	S-EE	putative holin protein [Z1794]
Z2122	S-EE	putative holin protein of prophage CP-933O [Z2122]
Z3106	S-EE	putative holin protein of prophage CP-933U [Z3106]
intL	S-EE	putative integrase for prophage 933L and the [Z5087]
frcK	S-EE	putative kinase [ECs3804]
waaD	S-EE	putative LPS biosynthesis enzyme [Z5050]
waaJ	S-EE	putative LPS biosynthesis enzyme [Z5051]
ynfE	S-EE	putative oxidoreductase, major subunit [b1587]
ynbB	S-EE	putative phosphatidate cytidiltransferase [b1409]
intC	S-EE	Putative prophage integrase [c_4491]
Z2046	S-EE	putative regulator of cell division encoded by [Z2046]
ECs1765	S-EE	putative regulatory protein [ECs1765]
ECs1766	S-EE	putative regulatory protein [ECs1766]
Z5000	S-EE	putative regulatory protein [Z5000]
c_4985	S-EE	Putative sorbose PTS component [c_4985]
Z5616	S-EE	putative sorbose PTS component [Z5616]
yidJ	S-EE	putative sulfatase [b3678]
yidJ	S-EE	putative sulfatase [Z5173]
Z1380	S-EE	putative tail component encoded by cryptic prophage [Z1380]
ECs1597	S-EE	putative terminase small subunit [ECs1597]
ECs1693	S-EE	putative TonB dependent outer membrane receptor [ECs1693]
ydcI	S-EE	putative transcriptional regulator LYSR-type [b1422]
Z5619	S-EE	putative transcriptional regulator of sorbose uptake and [Z5619]
ddpC	S-EE	putative transport protein [b1485]
ECs0346	S-EE	putative transporter [ECs0346]
ECs4502	S-EE	putative UDP-glucose: [ECs4502]
fimB	S-EE	recombinase involved in phase variation; regulator for fimA [b4312]
ECs1189	S-EE	replication protein O [ECs1189]
shiF	S-EE	shiF protein [c_3628]
Z2045	S-EE	similar to DicA, regulator of DicB encoded [Z2045]
ECs5001	S-EE	sorbose-permease PTS system IIB component [ECs5001]
ECs5004	S-EE	sor-operon regulator [ECs5004]
ECs3244	S-EE	sucrose operon repressor [ECs3244]
Z3626	S-EE	sucrose specific transcriptional regulator [Z3626]
ECs3243	S-EE	sucrose-6 phosphate hydrolase [ECs3243]
tehA	S-EE	tellurite resistance [b1429]
c_4507	S-EE	Transposase insF for insertion sequence IS3A/B/C/D/E/fA [c_4507]
Z6062	S-EE	unknown protein encoded by cryptic prophage CP-933P [Z6062]
c_1505	S-EE	Unknown protein encoded by prophage [c_1505]
Z2382	S-EE	unknown protein encoded within prophage CP-933R [Z2382]
pWR501_0205_S020	S-EE	pINV gene
pWR501_0215_S021	S-EE	pINV gene
yjdP	E-EE	conserved protein [b4487]
cpb2	E-EE	CopB protein (RepA2 protein) [L7006]
L7011	E-EE	hypothetical protein [L7011]
ybfQ	E-EE	predicted transposase [b4514]
psb1	E-EE	putative regulator of SOS induction [L7087]
ACA-0244256	E-EE	Replication protein []
mhpB	E-EE	2,3-dihydroxyphenylpropionate 1,2-dioxygenase [b0348]
mhpC	E-EE	2-hydroxy-6-ketonona-2,4-dienedioic acid hydrolase [b0349]
mhpD	E-EE	2-keto-4-pentenoate hydratase [b0350]
mhpA	E-EE	3- [b0347]
rlpB	E-EE	a minor lipoprotein [Z0788]
atoB	E-EE	acetyl-CoA acetyltransferase [b2224]
atoD	E-EE	acetyl-CoA:acetoacetyl-CoA transferase alpha subunit [b2221]
atoA	E-EE	acetyl-CoA:acetoacetyl-CoA transferase beta subunit [b2222]
frmA	E-EE	alcohol dehydrogenase class III; formaldehyde dehydrogenase, glutathione-dependent [b0356]
ECs0573	E-EE	allantoinase [ECs0573]
Z0339	E-EE	alpha replication protein of prophage CP-933I [Z0339]
phnN	E-EE	ATP-binding component of phosphonate transport [b4094]
srmB	E-EE	ATP-dependent RNA helicase srmB [c_3100]
lacZ	E-EE	beta-D-galactosidase [b0344]
lacZ	E-EE	Beta-galactosidase [c_0459]
c_2193	E-EE	Conserved hypothetical protein [c_2193]
c_2522	E-EE	Conserved hypothetical protein [c_2522]
tynA	E-EE	copper amine oxidase [b1386]
racC	E-EE	defective prophage rac; contains recE and oriJ [b1351]
yhaG	E-EE	D-galactarate dehydratase [c_3883]
dsdC	E-EE	D-serine dehydratase [b2364]
eutC	E-EE	ethanolamine ammonia-lyase, light chain [Z3705]
eutD	E-EE	ethanolamine utilization; homolog of Salmonella acetyl/butyryl P transferase [b2458]
eutG	E-EE	ethanolamine utilization; homolog of Salmonella enzyme, similar to iron-containing alcohol dehydrogenase [b2453]
eutE	E-EE	ethanolamine utilization; similar to acetaldehyde dehydrogenase [b2455]
ybbZ	E-EE	Glycerate kinase 1 [c_0628]
yjaZ	E-EE	heat shock protein htrC [b3989]
ECs4912	E-EE	heat shock protein htrC [ECs4912]
ycfZ	E-EE	homolog of virulence factor [b1121]
ydgJ	E-EE	Hypothetical oxidoreductase ydgJ [c_2016]
c_0278	E-EE	Hypothetical protein yafZ [c_0278]
yaiL	E-EE	Hypothetical protein yaiL [c_0462]
ycgF	E-EE	Hypothetical protein ycgF [c_1606]
ycgZ	E-EE	Hypothetical protein ycgZ [c_1607]
ydbL	E-EE	Hypothetical protein ydbL precursor [c_1830]
ydfD	E-EE	Hypothetical protein ydfD [c_1404]
yeaR	E-EE	Hypothetical protein yeaR [c_2204]
c_1272	E-EE	Hypothetical protein yeeP [c_1272]
c_3676	E-EE	Hypothetical protein yeeU [c_3676]
c_4576	E-EE	Hypothetical protein yeeV [c_4576]
yegL	E-EE	Hypothetical protein yegL [c_2599]
yehP	E-EE	Hypothetical protein yehP [c_2651]
yfeN	E-EE	Hypothetical protein yfeN [c_2941]
ygfT	E-EE	Hypothetical protein ygfT [c_3464]
yjiN	E-EE	Hypothetical protein yjiN [c_5419]
ymgB	E-EE	Hypothetical protein ymgB [c_1609]
ynjF	E-EE	Hypothetical protein ynjF [c_2159]
yeiI	E-EE	Hypothetical sugar kinase yeiI [c_2695]
ECs0218	E-EE	IcmF-like protein [ECs0218]
dicB	E-EE	inhibition of cell division [b1575]
acrF	E-EE	integral transmembrane protein; acridine resistance [b3266]
fdrA	E-EE	involved in protein transport; multicopy suppressor of dominant negative ftsH mutants [b0518]
gspO	E-EE	leader peptidase, integral membrane protein [b3335]
rfaC	E-EE	Lipopolysaccharide heptosyltransferase-1 [c_4447]
cadA	E-EE	lysine decarboxylase 1 [b4131]
Z2428	E-EE	partial putative pump protein disrupted by IS629 [Z2428]
Z0313	E-EE	partial replication protein P for prophage CP-933H [Z0313]
ECs2640	E-EE	phage tail protein [ECs2640]
feaB	E-EE	phenylacetaldehyde dehydrogenase [b1385]
phnI	E-EE	PhnI protein [c_5105]
phnO	E-EE	PhnO protein [c_5099]
phnP	E-EE	phosphonate metabolism [b4092]
chpA	E-EE	probable growth inhibitor, PemK-like, autoregulated [b2782]
agaC	E-EE	PTS system N-acetylgalactosamine-specific IIC component 1 [b3139]
cmtB	E-EE	PTS system, mannitol-specific enzyme II component, cryptic [b2934]
putA	E-EE	PutA protein [c_1151]
c_5300	E-EE	Putative acetyl-CoA:acetoacetyl-CoA transferase [c_5300]
agaR	E-EE	Putative aga operon transcriptional repressor [c_3886]
yeaN	E-EE	putative amino acid/amine transport protein [b1791]
ECs2500	E-EE	putative amino acid/amine transport protein [ECs2500]
yeaN	E-EE	putative amino acid/amine transport protein [Z2833]
c_2419	E-EE	Putative anthranilate synthase [c_2419]
ydiP	E-EE	putative ARAC-type regulatory protein [b1696]
b1169	E-EE	putative ATP-binding component of a transport system [b1169]
ygeY	E-EE	putative deacetylase [Z4211]
ygeX	E-EE	putative dehydratase [b2871]
agaR	E-EE	putative DEOR-type transcriptional regulator of aga operon [b3131]
ECs2631	E-EE	putative derepression protein [ECs2631]
ECs0303	E-EE	putative DNA primase [ECs0303]
yeeS	E-EE	putative DNA repair protein, RADC family [b2002]
ECs2622	E-EE	putative DNA-binding protein [ECs2622]
yagX	E-EE	putative enzyme [b0291]
paaF	E-EE	putative enzyme [b1393]
paaH	E-EE	putative enzyme [b1395]
yjiL	E-EE	putative enzyme [b4334]
Z0243	E-EE	putative enzyme Unknown function [Z0243]
frmB	E-EE	putative esterase [b0355]
yaiM	E-EE	putative esterase [Z0455]
gspA	E-EE	putative export protein A for general secretion pathway [b3323]
gspI	E-EE	putative export protein for general secretion pathway [b3330]
ykgJ	E-EE	putative ferredoxin [b0288]
yadK	E-EE	putative fimbrial protein [b0136]
yadN	E-EE	putative fimbrial-like protein [b0141]
ycbQ	E-EE	putative fimbrial-like protein [b0938]
b0374	E-EE	putative flagellin structural protein [b0374]
frvR	E-EE	putative frv operon regulatory protein [b3897]
frvR	E-EE	putative frv operon regulatory protein [Z5440]
agaI	E-EE	putative galactosamine-6-phosphate isomerase [b3141]
Z4497	E-EE	putative galactosamine-6-phosphate isomerase [Z4497]
yghF	E-EE	putative general secretion pathway for protein export [b2970]
yghD	E-EE	Putative general secretion pathway protein M-type yghD [c_3699]
allB	E-EE	putative hydrolase [b0512]
c_2422	E-EE	Putative inner membrane ABC-transporter [c_2422]
ECs2617	E-EE	putative integrase [ECs2617]
yqeA	E-EE	putative kinase [b2874]
yggC	E-EE	putative kinase [b2928]
alsB	E-EE	putative LACI-type transcriptional regulator [b4088]
yiaL	E-EE	putative lipase [b3576]
Z0250	E-EE	putative macrophage toxin [Z0250]
allD	E-EE	putative malate dehydrogenase [b0517]
ECs2619	E-EE	putative membrane protein [ECs2619]
alsK	E-EE	putative NAGC-like transcriptional regulator [b4084]
c_3153	E-EE	Putative outer membrane protein of prophage [c_3153]
ECs0022	E-EE	putative outer membrane usher protein precursor [ECs0022]
ydiO	E-EE	putative oxidoreductase [b1695]
ygcW	E-EE	putative oxidoreductase [b2774]
b2885	E-EE	putative oxidoreductase [b2885]
ygcU	E-EE	putative oxidoreductase subunit [b2773]
ygfT	E-EE	putative oxidoreductase, Fe-S subunit [b2887]
ybfP	E-EE	putative pectinase [b0689]
pppA	E-EE	putative peptidase [b2972]
c_2424	E-EE	Putative peptide synthetase [c_2424]
yjdL	E-EE	putative peptide transporter [b4130]
c_2436	E-EE	Putative pesticin receptor precursor [c_2436]
Z4487	E-EE	putative phosphotransferase system enzyme subunit [Z4487]
ECs2634	E-EE	putative plasmid partition protein [ECs2634]
ycgG	E-EE	putative proteases [b1168]
yfaX	E-EE	putative regulator [b2248]
phnO	E-EE	putative regulator, phn operon [b4093]
c_3712	E-EE	Putative saframycin Mx1 synthetase B [c_3712]
yqeI	E-EE	putative sensory transducer [b2847]
yqeI	E-EE	putative sensory transducer [Z4167]
Z2979	E-EE	putative stability/partitioning protein encoded within prophage CP-933T [Z2979]
yeeU	E-EE	putative structural protein [b2004]
yqeB	E-EE	putative synthases [b2875]
Z2986	E-EE	putative tail fiber protein of prophage CP-933T [Z2986]
Z3311	E-EE	putative tail fiber protein of prophage CP-933V [Z3311]
ECs2643	E-EE	putative tail protein [ECs2643]
zntR	E-EE	putative transcriptional regulator [b3292]
yagP	E-EE	putative transcriptional regulator LYSR-type [b0282]
b0359	E-EE	putative transferase [b0359]
c_0468	E-EE	Putative transferase [c_0468]
c_2489	E-EE	Putative transferase [c_2489]
ybbY	E-EE	putative transport [b0513]
mhpT	E-EE	putative transport protein [b0353]
yajR	E-EE	putative transport protein [b0427]
mdtG	E-EE	putative transport protein [b1053]
ygbN	E-EE	putative transport protein [b2740]
ECs0481	E-EE	putative transport protein [ECs0481]
ECs3631	E-EE	putative transport protein [ECs3631]
yajR	E-EE	putative transport protein [Z0530]
yqcE	E-EE	putative transport protein [Z4086]
alsC	E-EE	putative transport system permease protein [b4086]
Z4181	E-EE	putative Type III secretion apparatus protein [Z4181]
ECs2847	E-EE	putative UDP-galactose 4-epimerase [ECs2847]
Z3206	E-EE	putative UDP-galactose 4-epimerase [Z3206]
Z0022	E-EE	putative usher protein [Z0022]
yagT	E-EE	putative xanthine dehydrogenase [b0286]
xapR	E-EE	regulator for xapA [b2405]
rhsC	E-EE	rhsC protein in rhs element, interrupted [Z0847]
sbmC	E-EE	SbmC protein [b2009]
dpiA	E-EE	sequence similarity to Shigella regulator [b0620]
b1401	E-EE	split orf [b1401]
chpR	E-EE	suppressor of inhibitory function of ChpA, PemI-like, autoregulated [b2783]
mhpR	E-EE	transcriptional regulator for mhp operon [b0346]
acrE	E-EE	transmembrane protein affects septum formation and cell membrane permeability [b3265]
cadB	E-EE	transport of lysine/cadaverine [Z5735]
setC	E-EE	two-module transport protein [b3659]
ECs3726	E-EE	type III secretion protein EpaO [ECs3726]
ECs3718	E-EE	type III secretion protein EprI [ECs3718]
ECs3717	E-EE	type III secretion protein EprJ [ECs3717]
Z1840	E-EE	unknown protein encoded by prophage CP-933C [Z1840]
Z2967	E-EE	unknown protein encoded by prophage CP-933T [Z2967]
Z2969	E-EE	unknown protein encoded by prophage CP-933T [Z2969]
Z2976	E-EE	unknown protein encoded by prophage CP-933T [Z2976]
Z2095	E-EE	unknown protein encoded within prophage CP-933O [Z2095]
Z3123	E-EE	unknown protein encoded within prophage CP-933U [Z3123]
icsB	NDE	pINV gene
insA	NDE	pINV gene
ipaA	NDE	pINV gene
ipaB	NDE	pINV gene
ipaD	NDE	pINV gene
ipaJ	NDE	pINV gene
ipgA	NDE	pINV gene
ipgB	NDE	pINV gene
ipgC	NDE	pINV gene
ipgD	NDE	pINV gene
ipgE	NDE	pINV gene
ipgF	NDE	pINV gene
virB	NDE	pINV gene
virF	NDE	pINV gene
virG	NDE	pINV gene
virK	NDE	pINV gene
ipaH1_4	NDE	pINV gene
ipaH2_5	NDE	pINV gene
IpaH7_8	NDE	pINV gene
ipaH9_8	NDE	pINV gene
